# Supplementary material for: Restricting the use of antibiotics in food-producing animals and its associations with antibiotic resistance in food-producing animals and human beings: a systematic review and meta-analysis
Source: PubMed Central journal article supplement — Lancet Planet Health. 2017 Nov;1(8):e316–27. doi: 10.1016/S2542-5196(17)30141-9 (PMC5785333; doi:10.1016/s2542-5196(17)30141-9), 2017-11
Supplement: mmc1.pdf [file mmc1.pdf]

# THE LANCET

## Planetary Health

### Supplementary appendix

This appendix formed part of the original submission and has been peer reviewed. We post it as supplied by the authors.

Supplement to: Tang K L, Caffrey N P, Nóbrega D B, et al. Restricting the use of antibiotics in food-producing animals and its associations with antibiotic resistance in food-producing animals and human beings: a systematic review and meta-analysis. *Lancet Planet Health* 2017; published online Nov 6, 2017. [http://dx.doi.org/10.1016/S2542-5196\(17\)30141-9](http://dx.doi.org/10.1016/S2542-5196(17)30141-9)

## Appendix: Table of Contents

|                                                                                                                                                           |    |
|-----------------------------------------------------------------------------------------------------------------------------------------------------------|----|
| Section 1: MEDLINE search strategy.....                                                                                                                   | 2  |
| Section 2: Grey literature search strategy .....                                                                                                          | 6  |
| Figure 1: Geographic representation of countries* from which animal studies (human studies in parentheses) originate, with enlarged European insert ..... | 16 |
| Table 1: Study characteristics of individual animal studies.....                                                                                          | 17 |
| Table 2: Study characteristics of individual human studies.....                                                                                           | 33 |
| Table 3: Assessment of study quality for individual animal studies .....                                                                                  | 36 |
| Table 4: Assessment of study quality for individual human studies .....                                                                                   | 45 |
| Table 5: Trends in the prevalence of antibiotic resistance by bacterial class for studies not included in meta-analyses .....                             | 47 |
| Figure 2: Funnel plot for animal (Panel A) and human (Panel B) studies included in meta-analysis.....                                                     | 51 |
| References for included studies .....                                                                                                                     | 52 |

## Section 1: MEDLINE search strategy

| #  | Searches                                                                                                                                                                                                                                                                                                                                                                                                                                                                                                                                                                                                                                                                                                                                                 | Results   |
|----|----------------------------------------------------------------------------------------------------------------------------------------------------------------------------------------------------------------------------------------------------------------------------------------------------------------------------------------------------------------------------------------------------------------------------------------------------------------------------------------------------------------------------------------------------------------------------------------------------------------------------------------------------------------------------------------------------------------------------------------------------------|-----------|
| 1  | exp Poultry/                                                                                                                                                                                                                                                                                                                                                                                                                                                                                                                                                                                                                                                                                                                                             | 135,574   |
| 2  | exp Ruminants/                                                                                                                                                                                                                                                                                                                                                                                                                                                                                                                                                                                                                                                                                                                                           | 447,143   |
| 3  | exp Swine/                                                                                                                                                                                                                                                                                                                                                                                                                                                                                                                                                                                                                                                                                                                                               | 193,661   |
| 4  | exp Bees/                                                                                                                                                                                                                                                                                                                                                                                                                                                                                                                                                                                                                                                                                                                                                | 9,624     |
| 5  | exp Fishes/                                                                                                                                                                                                                                                                                                                                                                                                                                                                                                                                                                                                                                                                                                                                              | 154,782   |
| 6  | exp Seafood/                                                                                                                                                                                                                                                                                                                                                                                                                                                                                                                                                                                                                                                                                                                                             | 11,624    |
| 7  | exp Mollusca/                                                                                                                                                                                                                                                                                                                                                                                                                                                                                                                                                                                                                                                                                                                                            | 52,115    |
| 8  | exp Crustacea/                                                                                                                                                                                                                                                                                                                                                                                                                                                                                                                                                                                                                                                                                                                                           | 35,148    |
| 9  | (food animal* or farm* or production animal* or livestock or feedlot* or animal feeding operation* or AFO or CAFO).kw,tw.                                                                                                                                                                                                                                                                                                                                                                                                                                                                                                                                                                                                                                | 78,843    |
| 10 | (ruminant* or cattle or bovine or cow* or beef or heifer* or steer* or calf or calves or sheep or ovine or caprine or goat* or equine or horse* or lepine or rabbit* or deer or elk or game or buffalo or bison or swine or pork or pig* or hog* or boar*).kw,tw.                                                                                                                                                                                                                                                                                                                                                                                                                                                                                        | 1,164,249 |
| 11 | (chicken* or broiler* or turkey* or duck* or geese or goose or poultry or fowl or avian).kw,tw.                                                                                                                                                                                                                                                                                                                                                                                                                                                                                                                                                                                                                                                          | 175,957   |
| 12 | (bee or bees or honeybee* or apiary or apicultur*).kw,tw.                                                                                                                                                                                                                                                                                                                                                                                                                                                                                                                                                                                                                                                                                                | 14,422    |
| 13 | ((farm* or aquaculture) adj2 (fish or shellfish or seafood or amberjack or arapaima or asp or atipa or barb or barramundi or bass or beluga or bluefin or bluefish or bocachico or bonythongue or bream or bullhead or carp or catfish or char or cichlid or cobia or cod or dorada or eel* or gourami or guapote or grouper or halibut or lai or loach or mackerel or mandarin fish or meagre fish or milkfish or mojarra or mullet or mudfish or nori nei or perch or pejerrey or pike or porgy or pompano or red drum or roach or roho labeo or salmon or sampa or seabass or seabream or snakehead or snapper or snook or sole or spinefood or sturgeon or sweetfish or tench or tilapia or trout or tuna or turbot or vendace or whitefish)).kw,tw. | 3,753     |
| 14 | ((farm* or aquaculture) adj2 (shrimp or prawn* or crayfish or lobster* or crab*)).kw,tw.                                                                                                                                                                                                                                                                                                                                                                                                                                                                                                                                                                                                                                                                 | 615       |
| 15 | ((farm* or aquaculture) adj2 (abalone or bivalve* or clam* or carpet shell or cockle* or corbicula or geoduck or mussel* or oyster* or periwinkle* or quahog                                                                                                                                                                                                                                                                                                                                                                                                                                                                                                                                                                                             | 439       |

|    |                                                                                                                                                                                                                                                                                                                                                                                                                                                                                                                                                                                                                                                                                                                                                                                                                                                                                                                                                                                                                                                                                                                                                                                                                                                                                                                                                                                                                                                                                                                                                                                                                                                                                                                                                                                                                                                                                                                                                                                                                                                        |           |
|----|--------------------------------------------------------------------------------------------------------------------------------------------------------------------------------------------------------------------------------------------------------------------------------------------------------------------------------------------------------------------------------------------------------------------------------------------------------------------------------------------------------------------------------------------------------------------------------------------------------------------------------------------------------------------------------------------------------------------------------------------------------------------------------------------------------------------------------------------------------------------------------------------------------------------------------------------------------------------------------------------------------------------------------------------------------------------------------------------------------------------------------------------------------------------------------------------------------------------------------------------------------------------------------------------------------------------------------------------------------------------------------------------------------------------------------------------------------------------------------------------------------------------------------------------------------------------------------------------------------------------------------------------------------------------------------------------------------------------------------------------------------------------------------------------------------------------------------------------------------------------------------------------------------------------------------------------------------------------------------------------------------------------------------------------------------|-----------|
|    | or sand gaper* or scallop* or shellfish or tagelus or venus)).kw,tw.                                                                                                                                                                                                                                                                                                                                                                                                                                                                                                                                                                                                                                                                                                                                                                                                                                                                                                                                                                                                                                                                                                                                                                                                                                                                                                                                                                                                                                                                                                                                                                                                                                                                                                                                                                                                                                                                                                                                                                                   |           |
| 16 | aquaculture.kw,tw.                                                                                                                                                                                                                                                                                                                                                                                                                                                                                                                                                                                                                                                                                                                                                                                                                                                                                                                                                                                                                                                                                                                                                                                                                                                                                                                                                                                                                                                                                                                                                                                                                                                                                                                                                                                                                                                                                                                                                                                                                                     | 6,172     |
| 17 | Aquaculture/                                                                                                                                                                                                                                                                                                                                                                                                                                                                                                                                                                                                                                                                                                                                                                                                                                                                                                                                                                                                                                                                                                                                                                                                                                                                                                                                                                                                                                                                                                                                                                                                                                                                                                                                                                                                                                                                                                                                                                                                                                           | 4,788     |
| 18 | 1 or 2 or 3 or 4 or 5 or 6 or 7 or 8 or 9 or 10 or 11 or 12 or 13 or 14 or 15 or 16 or 17                                                                                                                                                                                                                                                                                                                                                                                                                                                                                                                                                                                                                                                                                                                                                                                                                                                                                                                                                                                                                                                                                                                                                                                                                                                                                                                                                                                                                                                                                                                                                                                                                                                                                                                                                                                                                                                                                                                                                              | 1,832,370 |
| 19 | drug resistance, microbial/ or exp drug resistance, bacterial/                                                                                                                                                                                                                                                                                                                                                                                                                                                                                                                                                                                                                                                                                                                                                                                                                                                                                                                                                                                                                                                                                                                                                                                                                                                                                                                                                                                                                                                                                                                                                                                                                                                                                                                                                                                                                                                                                                                                                                                         | 122,825   |
| 20 | ((antibacterial or anti-bacterial or antibiotic or anti-biotic or antimicrobial or anti-microbial) adj2 (resistan* or susceptib* or minimum inhibitory concentration)).kw,tw.                                                                                                                                                                                                                                                                                                                                                                                                                                                                                                                                                                                                                                                                                                                                                                                                                                                                                                                                                                                                                                                                                                                                                                                                                                                                                                                                                                                                                                                                                                                                                                                                                                                                                                                                                                                                                                                                          | 52,123    |
| 21 | ((aldesulfone or amdinopenicillin* or amikacin or aminocyclitol* or aminoglycoside* or aminopenicillin* or amoxicillin* or ampicillin or amphenicol* or ansamycin* or antipseudomonal or antistaphylococcal or apramycin or arbekacin or aspoxicillin or avilamycin or avoparcin or azalide or azidocillin or azithromycin or azlocillin or aztreonam or bacampicillin or bacitracin or baquiloprim or bekanamycin or benzylpenicillin or biapenem or bicozamycin or bicyclomycin* or brodimoprim or calcium aminosalicylate or capreomycin or carbadox or carbapenem* or carbenicillin or carboxypenicillin* or carindacillin or carumonam or cef* or cepha* or chloramphenicol or chlortetracycline or cinoxacin or ciprofloxacin or clarithromycin or clindamycin or clofazimine or clometocillin or clomocycline or cloxacillin or colistin or cyclic ester* or cyclic polypeptide* or cycloserine or dalbavancin or dalfopristin or danofloxacin or dapsone or daptomycin or demeclocycline or diaminopyrimidine* or dibekacin or dicloxacillin or difloxacin or dirithromycin or dihydrostreptomycin or doripenem or doxycycline or dihydrofolate reductase inhibitor* or enoxacin or enramycin or enrofloxacin or epicillin or ertapenem or erythromycin or ethambutol or ethionamide or faropenem or fleroxacin or flomoxef or florphenicol or flucloxacillin or flumeqin* or fluoroquinolone* or flurithromycin or fosfomycin or framycetin or furaltadone or furazolidone or fusidic acid or gamithromycin or garenoxacin or gatifloxacin or gemifloxacin or gentamicin or glycopeptide* or glycylicycline* or gramicidin or grepafloxacin or hetacillin or ibafloxacin or iclaprim or imipenem or ionophore* or isepamicin or isoniazid or josamycin or kanamycin or ketolilde* or kitasamycin or lasalocid or latamoxef or levofloxacin or lincomycin or lincosamide* or linezolid or lipopeptide* or lomefloxacin or loracarbef or lymecycline or macrolide* or maduramycin or marbofloxacin or mecillinam or meropenem or metacycline or | 93,911    |

|    |                                                                                                                                                                                                                                                                                                                                                                                                                                                                                                                                                                                                                                                                                                                                                                                                                                                                                                                                                                                                                                                                                                                                                                                                                                                                                                                                                                                                                                                                                                                                                                                                                                                                                                                                                                                                                                                                                                                                                                                                                                                                                                                                                                                                                                                                                                                                                                             |         |
|----|-----------------------------------------------------------------------------------------------------------------------------------------------------------------------------------------------------------------------------------------------------------------------------------------------------------------------------------------------------------------------------------------------------------------------------------------------------------------------------------------------------------------------------------------------------------------------------------------------------------------------------------------------------------------------------------------------------------------------------------------------------------------------------------------------------------------------------------------------------------------------------------------------------------------------------------------------------------------------------------------------------------------------------------------------------------------------------------------------------------------------------------------------------------------------------------------------------------------------------------------------------------------------------------------------------------------------------------------------------------------------------------------------------------------------------------------------------------------------------------------------------------------------------------------------------------------------------------------------------------------------------------------------------------------------------------------------------------------------------------------------------------------------------------------------------------------------------------------------------------------------------------------------------------------------------------------------------------------------------------------------------------------------------------------------------------------------------------------------------------------------------------------------------------------------------------------------------------------------------------------------------------------------------------------------------------------------------------------------------------------------------|---------|
|    | metampicillin or methicillin or meticillin or metronidazole or mezlocillin or midecamycin or miloxacin or miocamycin or minocycline or mirosamycin or monensin or monobactam* or morinamide or moxifloxacin or mupirocin or nafcillin or nalidixic acid or narasin or neomycin or netilmicin or nifurtinol or nitrofur* or nitroimidazole* or norfloxacin or novobiocin or ofloxacin or oleandomycin or orbifloxacin or oritavancin or ormosulfathiazole or ornidazole or orthosomycin* or oxacillin or oxazolidinone* or oxolinic acid or oxytetracycline or panipenem or para-aminosalicylic acid or paromomycin or pazufloxacin or pefloxacin or penamecillin or penethatamate or penicillin* or penimepicycline or phenethicillin or pheneticillin or phenicol* or phenoxyphenicillin* or phenoxyethylpenicillin or phthalylsulfathiazole or pipemidic acid or piperacillin or pirlimycin or piromidic acid or pivampicillin or pivmecillinam or pleuromutilin* or polymixin* or polymyxin* or polypeptide* or pristinamycin or propicillin or protionamide or prulifloxacin or pseudomonic acid* or pyrazinamide or pyrimethamine or quinolone* or quinoxaline* or quinupristin or retapamulin or ribostamycin or rifa* or riminofenazine* or rokitamycin or rolitetracycline or rosoxacin or roxithromycin or rufloxacin or sulfadoxine or salinomycin or semduramicin or sisomicin or sitafloxacin or sodium aminosalicylate or sparfloxacin or spectinomycin or spiramycin or streptoduocin or streptogramin* or streptomycin or sulbenicillin or sulfachlorpyridazine or sulfadi* or sulfafurazole or sulfaisodimidine or sulfisoxazole or sulfon* or sulfaguanidine or sulfam* or sulfon* or sulfanilamide or sulfafurazole or sulfalene or sulfam* or sulfanilamide or sulfap* or sulfaquinoxaline or sulfath* or sultamicillin or talampicillin or teicoplanin or telavancin or telithromycin or temafoxacin or temocillin or terdecamysin or terizidone or tetracycline* or tetroxoprim or thiamphenicol or tiamulin or ticarcillin or tigecycline or tildipirosin or tilmicosin or tinidazole or tiocarlide or tobicillin or tobramycin or trimethoprim or troleandomycin or trovafloxacin or tulathromycin or tylosin or tylvalosin or valnemulin or vancomycin or virginiamycin) adj2 (resistan* or susceptib* or minimum inhibitory concentration)).kw,tw. |         |
| 22 | exp Drug Resistance/                                                                                                                                                                                                                                                                                                                                                                                                                                                                                                                                                                                                                                                                                                                                                                                                                                                                                                                                                                                                                                                                                                                                                                                                                                                                                                                                                                                                                                                                                                                                                                                                                                                                                                                                                                                                                                                                                                                                                                                                                                                                                                                                                                                                                                                                                                                                                        | 273,591 |
| 23 | exp Anti-Bacterial Agents/ or exp Animal Feed/                                                                                                                                                                                                                                                                                                                                                                                                                                                                                                                                                                                                                                                                                                                                                                                                                                                                                                                                                                                                                                                                                                                                                                                                                                                                                                                                                                                                                                                                                                                                                                                                                                                                                                                                                                                                                                                                                                                                                                                                                                                                                                                                                                                                                                                                                                                              | 654,369 |
| 24 | (antibacterial or anti-bacterial or antibiotic or anti-biotic or antimicrobial or anti-microbial).kw,tw.                                                                                                                                                                                                                                                                                                                                                                                                                                                                                                                                                                                                                                                                                                                                                                                                                                                                                                                                                                                                                                                                                                                                                                                                                                                                                                                                                                                                                                                                                                                                                                                                                                                                                                                                                                                                                                                                                                                                                                                                                                                                                                                                                                                                                                                                    | 291,134 |

|    |                                                                                                                                                                                                                                                               |         |
|----|---------------------------------------------------------------------------------------------------------------------------------------------------------------------------------------------------------------------------------------------------------------|---------|
| 25 | 23 or 24                                                                                                                                                                                                                                                      | 791,722 |
| 26 | 22 and 25                                                                                                                                                                                                                                                     | 102,558 |
| 27 | AMR.kw,tw.                                                                                                                                                                                                                                                    | 1,504   |
| 28 | 19 or 20 or 21 or 26 or 27                                                                                                                                                                                                                                    | 188,126 |
| 29 | ((reduc* or decreas* or restrict* or limit* or ban or bans or banning or eliminat* or control* or regulat* or less* or cut* or scale* or scaling or down* or taper*) adj5 ("use" or usage or utilization or dose* or dosage or administ* or prescri*)).kw,tw. | 427,628 |
| 30 | (organic or (antibiotic adj2 free) or without antibiotic* or without antimicrobial*).kw,tw.                                                                                                                                                                   | 216,036 |
| 31 | 29 or 30                                                                                                                                                                                                                                                      | 640,063 |
| 32 | 18 and 28 and 31                                                                                                                                                                                                                                              | 849     |
| 33 | remove duplicates from 32                                                                                                                                                                                                                                     | 835     |

#### Notes on search terms:

- Antibiotic-related keywords were derived from the WHO List of Critically Important Antimicrobials for Human Medicine ([http://apps.who.int/iris/bitstream/10665/77376/1/9789241504485\\_eng.pdf](http://apps.who.int/iris/bitstream/10665/77376/1/9789241504485_eng.pdf)) and the OIE List of Antimicrobial Agents of Veterinary Importance ([http://www.oie.int/fileadmin/Home/eng/Our\\_scientific\\_expertise/docs/pdf/Eng\\_OIE\\_List\\_antimicrobials\\_May2015.pdf](http://www.oie.int/fileadmin/Home/eng/Our_scientific_expertise/docs/pdf/Eng_OIE_List_antimicrobials_May2015.pdf)).
- Keywords for species used in aquaculture were derived from the FAO Fisheries list of animal species used in aquaculture at <http://www.fao.org/docrep/W2333E/W2333E00.htm>.

## Section 2: Grey literature search strategy

The following websites/agencies/documents were included in our grey literature search:

### 1. CANADA

*1.1 Canadian Antimicrobial Resistance Alliance* (<http://www.can-r.com>)  
Manuscripts

*1.2 Public Health Agency*  
Canadian Integrated Program for Antimicrobial Resistance Surveillance (CIPARS)  
(<http://www.phac-aspc.gc.ca/cipars-picra/index-eng.php>)  
Canadian Antimicrobial Resistance Surveillance System Reports 2013 – 2015  
Canadian Nosocomial Infection Surveillance Program (CNISP) (<http://www.phac-aspc.gc.ca/nois-sinp/survprog-eng.php>)

- Surveillance projects
- Publications

*1.3 Health Canada*  
Antimicrobial resistance section (<http://www.hc-sc.gc.ca/dhp-mps/vet/antimicrob/index-eng.php>)

*1.4 Canadian Institutes of Health Research* (<http://www.cihr-irsc.gc.ca>)  
Health Services and Policy Research

- Publications

Population and Public Health

- Publications

### 2. DENMARK

*DANMAP* (<http://www.danmap.org/>)  
- Reports

### 3. THE NETHERLANDS

*3.1 MARAN* (<http://www.wageningenur.nl/en/Research-Results/Projects-and-programmes/MARAN-Antibiotic-usage.htm>)  
- References

*3.2 Sda*  
- Associations between antimicrobial use and the prevalence of resistant micro-organisms  
(<http://www.autoriteitdiergenoesmiddelen.nl/Userfiles/rapport%20ab%20en%20resistentie/def-engels-rapport-abgebruik-en-resistentie-0516.pdf>)

### 3.3 Government of the Netherlands

- Reduced and Responsible: use of antibiotics in food-producing animals in the Netherlands (<https://www.government.nl/documents/leaflets/2014/02/28/reduced-and-responsible-use-of-antibiotics-in-food-producing-animals-in-the-netherlands>)

## 4. SWEDEN

### *SVARM*

- Reports (<http://www.sva.se/en/antibiotika/svarm-reports>)

## 5. AUSTRALIA

*JETACAR* (<http://www.health.gov.au/internet/main/publishing.nsf/Content/health-pubs-jetacar-cnt.htm>)

## 6. UNITED KINGDOM

*Antimicrobial Resistance* (<https://www.gov.uk/government/collections/antimicrobial-resistance-amr-information-and-resources#strategic-publications>)

- Strategic publications

## 7. EUROPEAN UNION

### 7.1 Health and Food Safety

AMR ([http://ec.europa.eu/dgs/health\\_food-safety/amr/action\\_eu/index\\_en.htm](http://ec.europa.eu/dgs/health_food-safety/amr/action_eu/index_en.htm))

Projects, Studies and Related Information ([http://ec.europa.eu/dgs/health\\_food-safety/amr/projects/index\\_en.htm](http://ec.europa.eu/dgs/health_food-safety/amr/projects/index_en.htm))

### 7.2 European Centre for Disease Prevention and Control (ECDC)

European Antimicrobial Resistance Surveillance Network (EARS-Net)

(<http://ecdc.europa.eu/en/activities/surveillance/EARS-Net/Pages/index.aspx>)

European Surveillance of Antimicrobial Consumption (ESAC-Net)

(<http://ecdc.europa.eu/en/activities/surveillance/ESAC-Net/Pages/index.aspx>)

### 7.3 European Food Safety Authority (EFSA)

Antimicrobial resistance (<http://www.efsa.europa.eu/en/topics/topic/amr>)

- Completed work

### 7.4 European Medicines Agency (EMA)

European Surveillance of Veterinary Antimicrobial Consumption (ESVAC)

([http://www.ema.europa.eu/ema/index.jsp?curl=pages/regulation/document\\_listing/document\\_listing\\_000302.jsp](http://www.ema.europa.eu/ema/index.jsp?curl=pages/regulation/document_listing/document_listing_000302.jsp))



## Antimicrobial Resistance

([http://www.ema.europa.eu/ema/index.jsp?curl=pages/regulation/general/general\\_content\\_001686.jsp&mid=WC0b01ac05807a4e0d](http://www.ema.europa.eu/ema/index.jsp?curl=pages/regulation/general/general_content_001686.jsp&mid=WC0b01ac05807a4e0d))

- ECDC/EFSA/EMA first joint report on the integrated analysis of the consumption of antimicrobial agents and occurrence of antimicrobial resistance in bacteria from humans and food-producing animals

## 8. CENTERS FOR DISEASE CONTROL AND PREVENTION (CDC)

*Antibiotic/Antimicrobial Resistance* (<https://www.cdc.gov/drugresistance/>)

- Digital Materials ([https://www.cdc.gov/drugresistance/resources/digital\\_materials.html](https://www.cdc.gov/drugresistance/resources/digital_materials.html))
- Publications (<https://www.cdc.gov/drugresistance/resources/publications.html>)
- National Antimicrobial Resistance Monitoring System for Enteric Bacteria (NARMS) (<http://www.cdc.gov/narms/index.html>)
  - o Publications section
- Transatlantic Task Force on Antimicrobial Resistance (TATFAR) (<https://www.cdc.gov/drugresistance/tatfar/index.html>)
  - o Links and Resources
- Interagency Taskforce on Antimicrobial Resistance (ITFAR) (<http://www.cdc.gov/drugresistance/itfar/index.html>)
  - o ITFAR Link and Resources

## 9. US FOOD AND DRUG ADMINISTRATION (FDA)

*Antimicrobial Resistance*

(<http://www.fda.gov/AnimalVeterinary/SafetyHealth/AntimicrobialResistance/>)

- Guidance for Industry #209

## 10. JOINT PROGRAMMING INITIATIVE ON ANTIMICROBIAL RESISTANCE

(<http://www.jpiamr.eu/>)

Library

Workshop reports

Papers

## 11. WORLD ANTIMICROBIAL RESISTANCE CONFERENCE US

(<http://www.terrapinn.com/conference/antimicrobial-resistance-congress-usa/index.stm>)

## 12. WORLD HEALTH ORGANIZATION (WHO)

*12.1 IRIS Repository* (<http://apps.who.int/iris/>)

Search “antimicrobial resistance”

Antimicrobial use in aquaculture and antimicrobial resistance

- Antimicrobial resistance and rational use of antimicrobial agents (EM/RC49/8)

- Use of antimicrobials in food animals (weekly epidemiological record, no. 33, 18 August 2000)
- Impacts of antimicrobial growth promoter termination in Denmark
- Joint FAO/OIE/WHO Expert Workshop on Non-Human Antimicrobial Usage and Antimicrobial Resistance: Scientific assessment
- Second Joint FAO/OIE/WHO Expert Workshop on Non-Human Antimicrobial Usage and Antimicrobial Resistance: Management options
- The Medical Impact of Antimicrobial Use in Food Animals. Report of a WHO Meeting. Berlin, Germany, 13-17 October 1997
- Containing Antimicrobial Resistance (WHO/CDS/CSR/DRS/99/2)
- WHO Scientific working group on monitoring and management on bacterial resistance to antimicrobial agents (WHO/CDS/BVI/95.7)
- Regional strategy on prevention and containment of antimicrobial resistance 2010-2015
- Use of quinolones in food animals and potential impact on human health (WHO/EMC/ZDI/98.12)

#### *12.2 Strategic and Technical Advisory Group (STAG) on antimicrobial resistance*

[\(http://www.who.int/antimicrobial-resistance/events/stag/en/\)](http://www.who.int/antimicrobial-resistance/events/stag/en/)

6<sup>th</sup> meeting 11 May 2016

5<sup>th</sup> meeting 23-24 November 2015

4<sup>th</sup> meeting 24-25 February 2015

3<sup>rd</sup> meeting 17 October 2014

2<sup>nd</sup> meeting 14-16 April 2014

1<sup>st</sup> meeting 19-20 September 2013

#### *12.3 International Clinical Trials Registry Platform*

<http://apps.who.int/trialsearch/Default.aspx>

List by “Health Topics”

- Antimicrobial Resistance
- Epidemiology

### **13. INTERNATIONAL VETERINARY INFORMATION SERVICE**

<http://www.ivis.org/home.asp>

Search “antimicrobial resistance”

### **14. EUROPEAN SOCIETY OF CLINICAL MICROBIOLOGY AND INFECTIOUS DISEASES (ESCMID)**

*14.1 eLibrary* ([https://www.escmid.org/escmid\\_publications/escmid\\_elibrary/](https://www.escmid.org/escmid_publications/escmid_elibrary/))

Search “antimicrobial use animals”

- Checked all items until achieve 50% of relevance scale

*14.2 Conference on Reviving Old Antibiotics*

([https://www.escmid.org/research\\_projects/escmid\\_conferences/past\\_escmid\\_conferences/reviving\\_old\\_antibiotics/](https://www.escmid.org/research_projects/escmid_conferences/past_escmid_conferences/reviving_old_antibiotics/))

Final Programme

*14.3 The Lancet/ESCMID Conference on healthcare-associated infections and antimicrobial resistance*

([https://www.escmid.org/research\\_projects/escmid\\_conferences/past\\_escmid\\_conferences/haai\\_and\\_ab\\_resistance/](https://www.escmid.org/research_projects/escmid_conferences/past_escmid_conferences/haai_and_ab_resistance/))

**15. ReACT** (<http://www.reactgroup.org/>)

Policy and Reports

**16. CONSUMERS INTERNATIONAL**

*WCRD 2016: Antibiotic Resistance* (<http://www.consumersinternational.org/our-work/wcrd/wcrd-2016/>)

- WCRD 2016 Resource Pack

**17. WORLD ORGANIZATION FOR ANIMAL HEALTH (OIE)**

*Antimicrobial Resistance* (<http://www.oie.int/en/for-the-media/amr/>)

OIE Global Conference on the Prudent Use of Antimicrobial Agents for Animals

- Presentations / Abstracts ([http://www.oie.int/eng/A\\_AMR2013/presentations.htm](http://www.oie.int/eng/A_AMR2013/presentations.htm))

**18. ANTIMICROBIAL RESISTANCE ONE HEALTH COLLOQUIUM**

Available on

[https://www.chathamhouse.org/sites/files/chathamhouse/field/field\\_document/AMR%20%20One%20Health%20Colloquium%20Meeting%20Summary%20jm-er%20ao%20-%2028%20April%2015.pdf](https://www.chathamhouse.org/sites/files/chathamhouse/field/field_document/AMR%20%20One%20Health%20Colloquium%20Meeting%20Summary%20jm-er%20ao%20-%2028%20April%2015.pdf)

**19. FOOD AND AGRICULTURAL ORGANIZATION OF THE UNITED NATIONS (FAO)**

*Antimicrobial Resistance* (<http://www.fao.org/antimicrobial-resistance/en/>)

- Publications section
- Uso de antimicrobianos en animales de consumo (<http://www.fao.org/3/a-y5468s.pdf>)
- Joint FAO/WHO/OIE Expert Meeting on Critically Important Antimicrobials (<ftp://ftp.fao.org/docrep/fao/010/i0204e/i0204e00.pdf>)
- CODEX Alimentarius
  - o Guidelines for risk analysis of foodborne antimicrobial resistance CAC/GL 77- 2011 (<http://www.fao.org/fao-who-codexalimentarius/sh->

[proxy/en/?lnk=1&url=https%253A%252F%252Fworkspace.fao.org%252Fsites%252Fcodex%252Fstandards%252FCAC%2BGL%2B77-2011%252FCXG\\_077e.pdf](https://www.fao.org/who-codexalimentary/sh-proxy/en/?lnk=1&url=https%253A%252F%252Fworkspace.fao.org%252Fsites%252Fcodex%252Fstandards%252FCAC%2BGL%2B77-2011%252FCXG_077e.pdf))

- Code of practice to minimize and contain antimicrobial resistance CAC/RCP 61-2005 ([http://www.fao.org/who-codexalimentary/sh-proxy/en/?lnk=1&url=https%253A%252F%252Fworkspace.fao.org%252Fsites%252Fcodex%252Fstandards%252FCAC%2BRCP%2B61-2005%252FCXP\\_061e.pdf](http://www.fao.org/who-codexalimentary/sh-proxy/en/?lnk=1&url=https%253A%252F%252Fworkspace.fao.org%252Fsites%252Fcodex%252Fstandards%252FCAC%2BRCP%2B61-2005%252FCXP_061e.pdf))

## 20. ANIMAL HEALTH INSTITUTE

*Animal Antibiotics* (<http://www.ahi.org/issues-advocacy/animal-antibiotics/>)

- The Danish experience (<http://www.ahi.org/wp-content/uploads/2011/06/Pork-Check-off-DanishExperience1.pdf>)
- Political bans on antibiotics are counterproductive (<http://www.ahi.org/Files/Antibiotics%20in%20Livestock/H.%20Danish%20experience.pdf>)

## 21. AMERICAN VETERINARY MEDICAL ASSOCIATION (AVMA)

*Antimicrobial Resistance FAQs*

(<https://www.avma.org/KB/Resources/FAQs/Pages/Antimicrobial-Use-and-Antimicrobial-Resistance-FAQs.aspx>)

## 22. NATIONAL INSTITUTE OF ALLERGY AND INFECTIOUS DISEASES (NIAID)

*NIAID's Antibacterial Resistance Program: Current Status and Future Directions*

(<http://www.niaid.nih.gov/topics/antimicrobialResistance/Documents/ARstrategicplan2014.pdf>)

## 23. CLINICALTRIALS.GOV

Search “Antimicrobial Animal”

## 24. INNOVATIVE MEDICINES INITIATIVE (IMI)

*Combating antimicrobial resistance in Europe (COMBACTE)*

(<http://www.imi.europa.eu/content/combacte>)

- Projects

## 25. LIST OF CONFERENCE PROCEEDINGS FROM SCIENTIFIC MEETINGS:

Proceedings/presentations from the following conferences/meetings were manually reviewed and abstracts were selected based on the eligibility criteria described in the methods section of the report:

ASM Conference on Antimicrobial Resistance in Zoonotic Bacteria and Foodborne Pathogens  
Denmark, 2008

2<sup>nd</sup> ASM Conference on Antimicrobial Resistance in Zoonotic Bacteria and Foodborne  
Pathogens in Animals, Humans and the Environment  
Canada, 2010

3<sup>rd</sup> ASM Conference on Antimicrobial Resistance in Zoonotic Bacteria and Foodborne  
Pathogens in Animals, Humans and the Environment  
France, 2012

4<sup>th</sup> ASM Conference on Antimicrobial Resistance in Zoonotic Bacteria and Foodborne  
Pathogens  
United States, 2015

2009 - ASM-ESCMID Conference on Methicillin-resistant Staphylococci in Animals  
England, 2009

2011 - Methicillin-resistant Staphylococci in Animals: Veterinary and Public Health Implications  
United States, 2011

3<sup>rd</sup> ASM-ESCMID Methicillin-resistant Staphylococci in Animals: Veterinary and Public Health  
Implications  
Denmark, 2013

4<sup>th</sup> ASM-ESCMID Conference on Methicillin-resistant Staphylococci in Animals: Veterinary  
and Public Health Implications  
United States 2015

American Society for Microbiology 110<sup>th</sup> – 115<sup>th</sup> General Meetings

ASM-ESCMID International Workshop on Dermatological Infections and Food-borne Diseases  
United States, 2015

2010 International Conference on Antimicrobial Research  
Spain, 2010

2012 International Conference on Antimicrobial Research  
Portugal, 2012

2014 International Conference on Antimicrobial Research  
Spain, 2014

2016 International Conference on Antimicrobial Research  
Spain, 2016

Section 2

National Foundation for Infectious Diseases 2002 Conference on Antimicrobial Resistance  
United States, 2002

National Foundation for Infectious Diseases 2003 Conference on Antimicrobial Resistance  
United States, 2003

National Foundation for Infectious Diseases 2004 Conference on Antimicrobial Resistance  
United States, 2004

National Foundation for Infectious Diseases 2005 Conference on Antimicrobial Resistance  
United States, 2005

National Foundation for Infectious Diseases 2006 Conference on Antimicrobial Resistance  
United States, 2006

National Foundation for Infectious Diseases 2007 Conference on Antimicrobial Resistance  
United States, 2007

National Foundation for Infectious Diseases 2008 Conference on Antimicrobial Resistance  
United States, 2008

National Foundation for Infectious Diseases 2010 Conference on Antimicrobial Resistance  
United States, 2010

2015 Meeting of the Transatlantic Taskforce on Antimicrobial Resistance  
Luxembourg, 2015

CDC 64<sup>th</sup> Epidemic Intelligence Service  
United States, 2015

14<sup>th</sup> International Congress on Infectious Diseases  
United States, 2010

15<sup>th</sup> International Congress on Infectious Diseases  
Thailand, 2012

16<sup>th</sup> International Congress on Infectious Diseases  
South Africa, 2014

17<sup>th</sup> International Congress on Infectious Diseases  
India, 2016

2007 International Meeting on Emerging Diseases and Surveillance  
Austria, 2007

Section 2

2009 International Meeting on Emerging Diseases and Surveillance  
Austria, 2009

2011 International Meeting on Emerging Diseases and Surveillance  
Austria, 2011

2013 International Meeting on Emerging Diseases and Surveillance  
Austria, 2013

2014 International Meeting on Emerging Diseases and Surveillance  
Austria, 2014

22<sup>nd</sup> World Buiatrics Congress  
Germany, 2002

23<sup>rd</sup> World Buiatrics Congress  
Canada, 2004

24<sup>th</sup> World Buiatrics Congress  
France, 2006

25<sup>th</sup> World Buiatrics Congress  
Hungary, 2008

26<sup>th</sup> World Buiatrics Congress  
Chile, 2010

27<sup>th</sup> World Buiatrics Congress  
Portugal, 2012

28<sup>th</sup> World Buiatrics Congress  
Australia, 2014

2010 National Mastitis Council Annual Meeting  
United States, 2010

2011 National Mastitis Council Annual Meeting  
United States, 2011

2012 National Mastitis Council Annual Meeting  
United States, 2012

2013 National Mastitis Council Annual Meeting  
United States, 2013

2014 National Mastitis Council Annual Meeting

Section 2

United States, 2014

2015 National Mastitis Council Annual Meeting  
United States, 2015

2011 International Meeting on Neglected Tropical Diseases  
United States, 2011



**Figure 1: Geographic representation of countries\* from which animal studies (human studies in parentheses) originate, with enlarged European insert**

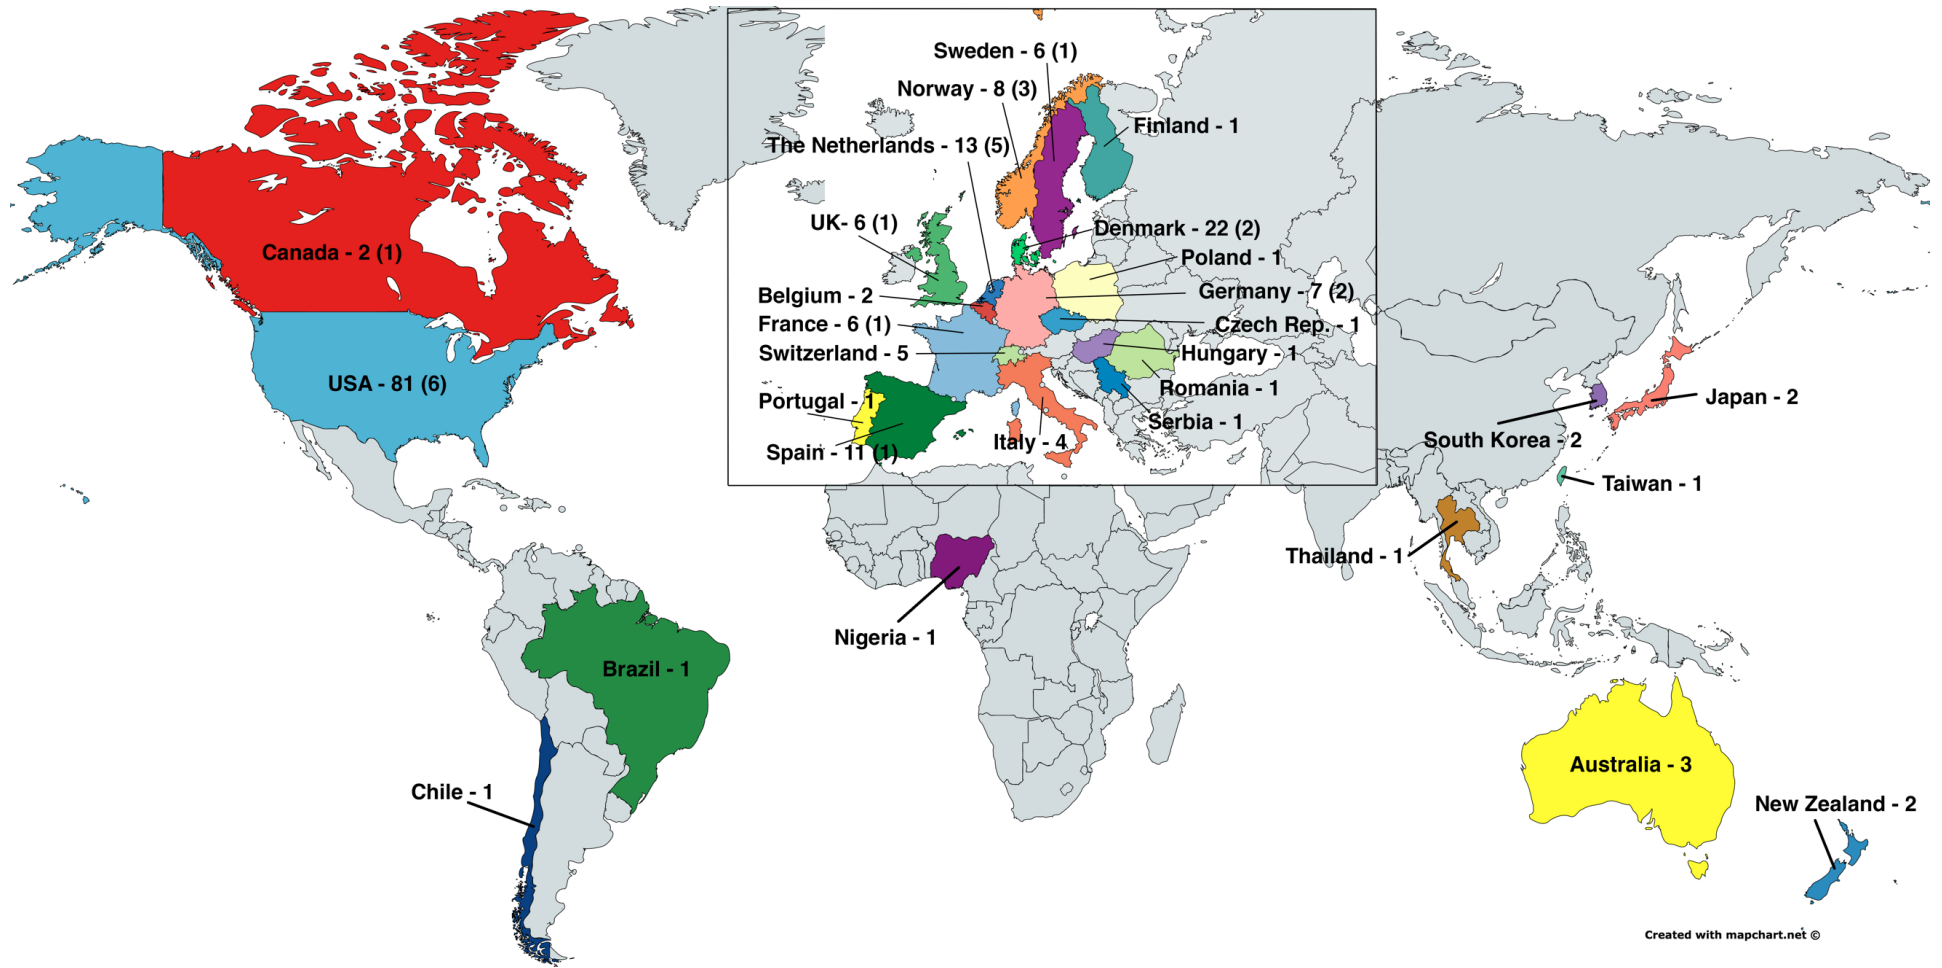

\*Studies may include data from more than one country. Five studies did not report the country of origin.

**Table 1: Study characteristics of individual animal studies**

| First author (Year)                    | Country                  | Study design         | Intervention |         |                 |                     | Population sampled (Sample type) | Sample point            | Unit of analysis (n) | Bacteria studied   |                          |                           |                            |       |                                    |
|----------------------------------------|--------------------------|----------------------|--------------|---------|-----------------|---------------------|----------------------------------|-------------------------|----------------------|--------------------|--------------------------|---------------------------|----------------------------|-------|------------------------------------|
|                                        |                          |                      | External ban | Organic | Antibiotic free | Voluntary reduction |                                  |                         |                      | Enterobacteriaceae | <i>Enterococcus</i> spp. | <i>Campylobacter</i> spp. | <i>Staphylococcus</i> spp. | Other | Genotypic or phenotypic resistance |
| Aarestrup (1995) <sup>1</sup>          | Denmark                  | Cross-sectional      |              |         | •               |                     | Broilers, egg layers (Faeces)    | Farm                    | Isolate (29)         | •                  |                          |                           |                            |       | Both                               |
| Aarestrup (2000a) <sup>2</sup>         | Denmark                  | Cross-sectional      |              |         |                 | •                   | Broilers (Faeces)                | Farm                    | Isolate (192)        | •                  |                          |                           |                            |       | Phenotypic                         |
| Aarestrup (2000b) <sup>3</sup>         | Denmark, Finland, Norway | Cross-sectional      | •            |         |                 |                     | Broilers, pigs (Faeces)          | Farm                    | Isolate (322)        | •                  |                          |                           |                            |       | Both                               |
| Aarestrup (2001) <sup>4</sup>          | Denmark                  | Longitudinal         | •            |         | •               |                     | Broilers, pigs (Caecal, cloacal) | Farm                    | Isolate (2,617)      | •                  |                          |                           |                            |       | Phenotypic                         |
| Aarestrup (2002) <sup>5</sup>          | Denmark, Spain, Sweden   | Cross-sectional      | •            |         |                 |                     | Pigs (Faeces)                    | Slaughter               | Isolate (380)        | •                  |                          |                           |                            |       | Both                               |
| Abdallahman (2015) <sup>6</sup>        | USA                      | Cross-sectional      |              | •       |                 |                     | Broilers, turkeys (Meat)         | Retail                  | Isolate (168)        |                    |                          | •                         |                            |       | Both                               |
| Agersø (2013) <sup>7</sup>             | Denmark                  | Cross-sectional      | •            |         |                 |                     | Pigs (Caecal, faeces)            | Farm, retail, slaughter | Sample (1,970)       | •                  |                          |                           |                            |       | Genotypic                          |
| Agga (2015) <sup>8</sup>               | USA                      | Cross-sectional      |              |         | •               |                     | Beef cows (Faeces)               | NR                      | Animal (369)         | •                  | •                        |                           |                            |       | Phenotypic                         |
| Alali (2010) <sup>9</sup>              | USA                      | Cross-sectional      |              | •       |                 |                     | Broilers (Environment, faeces)   | Farm                    | Isolate (70)         | •                  |                          |                           |                            |       | Phenotypic                         |
| Álvarez-Fernández (2012) <sup>10</sup> | Spain                    | Cross-sectional      |              | •       |                 |                     | Broilers, quail (Eggs)           | Retail                  | Isolate (120)        | •                  |                          |                           |                            |       | Phenotypic                         |
| Álvarez-Fernández (2013) <sup>11</sup> | Spain                    | Cross-sectional      |              | •       |                 |                     | Broilers, turkey, quail (Meat)   | Retail                  | Isolate (60)         | •                  |                          |                           |                            |       | Phenotypic                         |
| Avrain (2003) <sup>12</sup>            | France                   | Longitudinal         |              |         | •               |                     | Broilers (Caecal)                | Slaughter               | Isolate (346)        |                    | •                        |                           |                            |       | Phenotypic                         |
| Bager (1999) <sup>13</sup>             | Denmark                  | Longitudinal         | •            |         |                 |                     | Broilers, pigs (Caecal, cloacal) | Slaughter               | Isolate (437)        | •                  |                          |                           |                            |       | Phenotypic                         |
| Barlow (2008) <sup>14</sup>            | Australia                | Cross-sectional      |              | •       |                 |                     | Beef cows (Faeces, hide, meat)   | Farm, slaughter         | Isolate (556)        |                    |                          |                           |                            | •     | Genotypic                          |
| Barlow (2009) <sup>15</sup>            | Australia                | Cross-sectional      |              | •       |                 |                     | Beef cows (Faeces)               | Farm, slaughter         | Isolate (129)        | •                  |                          |                           |                            | •     | Genotypic                          |
| Bauer-Garland (2006) <sup>16</sup>     | USA                      | Non-randomized trial |              |         | •               |                     | Broilers (Caecal)                | Farm                    | Isolate (40)         | •                  |                          |                           |                            |       | Phenotypic                         |

Table 1 (continued)

| First author (Year)                | Country                                  | Study design                  | Intervention |         |                 |                     | Population sampled (Sample type) | Sample point | Unit of analysis (n)      | Bacteria studied   |                          |                           |                            |       |                                    |
|------------------------------------|------------------------------------------|-------------------------------|--------------|---------|-----------------|---------------------|----------------------------------|--------------|---------------------------|--------------------|--------------------------|---------------------------|----------------------------|-------|------------------------------------|
|                                    |                                          |                               | External ban | Organic | Antibiotic free | Voluntary reduction |                                  |              |                           | Enterobacteriaceae | <i>Enterococcus</i> spp. | <i>Campylobacter</i> spp. | <i>Staphylococcus</i> spp. | Other | Genotypic or phenotypic resistance |
| Bengtsson (2006) <sup>17</sup>     | Denmark, Norway, Sweden, The Netherlands | Cross-sectional               | •            |         |                 |                     | Broilers, pigs (Faeces, meat)    | NR           | Isolate (3,473)           | •                  | •                        |                           |                            |       | Phenotypic                         |
| Bennedsgaard (2006) <sup>18</sup>  | Denmark                                  | Cross-sectional               |              | •       |                 |                     | Dairy cows (Milk)                | Farm         | Animal (2,311), herd (57) |                    |                          |                           | •                          |       | Phenotypic                         |
| Boerlin (2001) <sup>19</sup>       | Switzerland                              | Longitudinal                  | •            |         |                 |                     | Pigs (Faeces)                    | Farm         | Isolate (155)             |                    | •                        |                           |                            |       | Both                               |
| Bombyk (2007) <sup>20</sup>        | USA                                      | Cross-sectional               |              | •       |                 |                     | Dairy cows (Milk)                | Farm         | Isolate (NR)              |                    |                          |                           | •                          |       | Genotypic                          |
| Bombyk (2008) <sup>21</sup>        | USA                                      | Cross-sectional               |              | •       |                 |                     | Dairy cows (Milk)                | Farm         | Isolate (405)             |                    |                          |                           | •                          |       | Phenotypic                         |
| Borgen (2000) <sup>22</sup>        | Norway                                   | Cross-sectional               | •            |         |                 |                     | Broilers (Bird, faeces)          | Farm         | Farm (147)                |                    | •                        |                           |                            |       | Both                               |
| Borgen (2001) <sup>23</sup>        | Norway                                   | Cross-sectional               | •            |         |                 |                     | Poultry (Carcass)                | Slaughter    | Isolate (150)             |                    | •                        |                           |                            |       | Both                               |
| Boutet (2005) <sup>24</sup>        | Belgium                                  | Cross-sectional               |              | •       |                 |                     | Dairy cows (Milk)                | Farm         | Isolate (1,002)           |                    |                          |                           | •                          |       | Phenotypic                         |
| Boyer (2012) <sup>25</sup>         | USA                                      | Cross-sectional               |              |         |                 | •                   | Dairy cows (Faeces)              | Farm         | Sample (455)              | •                  |                          |                           |                            |       | Both                               |
| Bunner (2007) <sup>26</sup>        | USA                                      | Cross-sectional               |              |         |                 | •                   | Pigs (Faeces)                    | Farm         | Isolate (1,381)           | •                  |                          |                           |                            |       | Phenotypic                         |
| Buntenkoetter (2014) <sup>27</sup> | Germany                                  | Cross-sectional, longitudinal |              | •       |                 |                     | Pigs (Environment)               | Farm         | Isolate (273)             |                    |                          |                           | •                          |       | Phenotypic                         |

Table 1 (continued)

| First author (Year)                            | Country                  | Study design    | Intervention |         |                 |                     | Population sampled (Sample type)    | Sample point            | Unit of analysis (n) | Bacteria studied   |                          |                           |                            |       |                                    |
|------------------------------------------------|--------------------------|-----------------|--------------|---------|-----------------|---------------------|-------------------------------------|-------------------------|----------------------|--------------------|--------------------------|---------------------------|----------------------------|-------|------------------------------------|
|                                                |                          |                 | External ban | Organic | Antibiotic free | Voluntary reduction |                                     |                         |                      | Enterobacteriaceae | <i>Enterococcus</i> spp. | <i>Campylobacter</i> spp. | <i>Staphylococcus</i> spp. | Other | Genotypic or phenotypic resistance |
| Butaye (1999) <sup>28</sup>                    | Belgium                  | Cross-sectional | •            |         |                 |                     | Broilers, egg layers, pigs (Faeces) | Farm                    | Animal (420)         | •                  |                          |                           |                            |       | Both                               |
| Cho (2006) <sup>29</sup>                       | USA                      | Cross-sectional |              | •       |                 |                     | Dairy cows (Faeces, milk filters)   | Farm, county fairs      | Isolate (40)         | •                  |                          |                           |                            |       | Phenotypic                         |
| Cho (2007) <sup>30</sup>                       | USA                      | Cross-sectional |              | •       |                 |                     | Dairy cows (Faeces)                 | Farm, county fairs      | Isolate (83)         | •                  |                          |                           |                            |       | Phenotypic                         |
| Cicconi-Hogan (2014) <sup>31</sup>             | USA                      | Cross-sectional |              | •       |                 |                     | Dairy cows (Milk)                   | Farm                    | Isolate (12)         |                    |                          |                           | •                          |       | Both                               |
| CIPARS (2016) <sup>32</sup>                    | Canada                   | Longitudinal    |              |         |                 | •                   | Chicken (Faeces, meat)              | Farm, retail, slaughter | NR                   | •                  |                          |                           |                            |       | Phenotypic                         |
| Coalition for Animal Health (NR) <sup>33</sup> | Denmark                  | Longitudinal    | •            |         |                 |                     | Pigs, poultry (Meat)                | NR                      | NR                   | •                  | •                        | •                         |                            |       | Phenotypic                         |
| Cohen Stuart (2012) <sup>34</sup>              | The Netherlands          | Cross-sectional |              | •       |                 |                     | Broilers (Meat)                     | Retail                  | Sample (98)          | •                  |                          |                           |                            |       | Both                               |
| Cui (2004) <sup>35</sup>                       | USA                      | Cross-sectional |              | •       |                 |                     | Broilers (meat)                     | Retail                  | Sample (259)         | •                  |                          |                           |                            |       | Phenotypic                         |
| Cui (2005) <sup>36</sup>                       | USA                      | Cross-sectional |              | •       |                 |                     | Broilers (meat)                     | Retail                  | Isolate (185)        | •                  |                          | •                         |                            |       | Phenotypic                         |
| Cuny (2012) <sup>37</sup>                      | Germany                  | Cross-sectional |              |         |                 | •                   | Pigs (Nasal swab)                   | Farm                    | Farm (82)            |                    |                          |                           |                            | •     | Phenotypic                         |
| Del Grosso (2000) <sup>38</sup>                | Italy                    | Longitudinal    | •            |         |                 |                     | Pigs, poultry (Faeces, meat)        | Retail                  | Isolate (1,324)      |                    | •                        |                           |                            |       | Both                               |
| Desmonts (2004) <sup>39</sup>                  | France                   | Longitudinal    | •            |         |                 |                     | Broilers (Caecal, skin)             | Farm, slaughter, retail | Isolate (661)        |                    |                          |                           | •                          |       | Phenotypic                         |
| Docic (2003) <sup>40</sup>                     | Hungary, Romania, Serbia | Cross-sectional |              |         |                 | •                   | Pigs (Rectal swab)                  | Farm                    | Herd (39)            | •                  |                          |                           |                            |       | Phenotypic                         |

Table 1 (continued)

| First author (Year)                 | Country         | Study design    | Intervention |         |                 |                     | Population sampled (Sample type)                | Sample point      | Unit of analysis (n) | Bacteria studied   |                          |                           |                            |       |                                    |
|-------------------------------------|-----------------|-----------------|--------------|---------|-----------------|---------------------|-------------------------------------------------|-------------------|----------------------|--------------------|--------------------------|---------------------------|----------------------------|-------|------------------------------------|
|                                     |                 |                 | External ban | Organic | Antibiotic free | Voluntary reduction |                                                 |                   |                      | Enterobacteriaceae | <i>Enterococcus</i> spp. | <i>Campylobacter</i> spp. | <i>Staphylococcus</i> spp. | Other | Genotypic or phenotypic resistance |
| Dolejska (2011) <sup>41</sup>       | Czech Republic  | Cross-sectional |              |         |                 | •                   | Dairy cows (Milk filter, rectal swab)           | Farm              | Sample (463)         | •                  |                          |                           |                            |       | Genotypic                          |
| Dorado-García (2013) <sup>42</sup>  | The Netherlands | Longitudinal    |              |         |                 | •                   | Pigs (Nasal swab)                               | Farm              | Farm (40)            |                    |                          |                           | •                          |       | Phenotypic                         |
| Dorado-García (2015a) <sup>43</sup> | The Netherlands | Longitudinal    |              |         |                 | •                   | Pigs (Nasal swab)                               | Farm              | Farm (36)            |                    |                          |                           | •                          |       | Phenotypic                         |
| Dorado-García (2015b) <sup>44</sup> | The Netherlands | Longitudinal    |              |         |                 | •                   | Veal (Environment, nasal swab)                  | Farm              | Farm (51)            |                    |                          |                           | •                          |       | Phenotypic                         |
| Dorado-García (2016) <sup>45</sup>  | The Netherlands | Longitudinal    | •            |         |                 |                     | Broilers, Pigs, Veal Calves, Dairy cows (MARAN) | Farm, slaughter   | Isolate (MARAN)      | •                  |                          |                           |                            |       | Phenotypic                         |
| Dutil (2010) <sup>46</sup>          | Canada          | Longitudinal    |              |         |                 | •                   | Broilers (Meat)                                 | Retail            | Isolate (950)        | •                  |                          |                           |                            |       | Phenotypic                         |
| El-Shibiny (2005) <sup>47</sup>     | UK              | Longitudinal    |              | •       |                 |                     | Broilers (Faeces)                               | Farm              | Isolate (55)         |                    |                          | •                         |                            |       | Phenotypic                         |
| Emborg (2002) <sup>48</sup>         | Denmark         | Longitudinal    | •            |         |                 |                     | Broilers (Cloacal swab, meat)                   | Retail, slaughter | Isolate (DANMAP)     |                    | •                        |                           |                            |       | Phenotypic                         |
| Fraqueza (2014) <sup>49</sup>       | Portugal        | Cross-sectional |              | •       |                 |                     | Broilers (Caecal, meat)                         | Slaughter         | Isolate (167)        |                    |                          | •                         |                            |       | Phenotypic                         |
| Gallay (2007) <sup>50</sup>         | France          | Longitudinal    | •            |         |                 |                     | Broilers, pigs (Caecal)                         | Slaughter         | Isolate (1,789)      |                    |                          | •                         |                            |       | Phenotypic                         |
| Garcia-Migura (2005) <sup>51</sup>  | UK              | Longitudinal    |              | •       |                 |                     | Broilers, pigs (Environment, faeces)            | Farm              | Farm (47)            |                    | •                        |                           |                            |       | Both                               |
| Garmo (2010) <sup>52</sup>          | Norway          | Longitudinal    |              | •       |                 |                     | Dairy cows (Milk)                               | Farm              | Isolate (4,209)      |                    |                          |                           | •                          |       | Phenotypic                         |
| Ge (2004) <sup>53</sup>             | USA             | Cross-sectional |              | •       |                 |                     | Chickens (Meat)                                 | Retail            | Isolate (NR)         |                    |                          | •                         |                            |       | Phenotypic                         |

Table 1 (continued)

| First author (Year)           | Country                        | Study design    | Intervention |         |                 |                     | Population sampled (Sample type)       | Sample point    | Unit of analysis (n) | Bacteria studied   |                   |                    |                     |       | Genotypic or phenotypic resistance |
|-------------------------------|--------------------------------|-----------------|--------------|---------|-----------------|---------------------|----------------------------------------|-----------------|----------------------|--------------------|-------------------|--------------------|---------------------|-------|------------------------------------|
|                               |                                |                 | External ban | Organic | Antibiotic free | Voluntary reduction |                                        |                 |                      | Enterobacteriaceae | Enterococcus spp. | Campylobacter spp. | Staphylococcus spp. | Other |                                    |
| Gebreyes (2006) <sup>54</sup> | USA                            | Cross-sectional |              |         | •               |                     | Pigs (Carcass swab, faeces)            | Farm, slaughter | Isolate (703)        | •                  |                   |                    |                     |       | Phenotypic                         |
| Gellin (1989) <sup>55</sup>   | USA                            | Cross-sectional |              |         | •               | •                   | Pigs (Rectal swab)                     | Farm            | Isolate (1,324)      | •                  |                   |                    |                     |       | Phenotypic                         |
| Gerzova (2015) <sup>56</sup>  | Denmark, France, Italy, Sweden | Cross-sectional |              | •       |                 |                     | Pigs (Faeces)                          | Slaughter       | Sample (468)         |                    |                   |                    |                     | •     | Genotypic                          |
| Guarddon (2014) <sup>57</sup> | Spain                          | Cross-sectional |              | •       |                 |                     | Beef cows, broilers, pigs (Meat)       | Retail          | Sample (200)         | •                  |                   |                    |                     |       | Genotypic                          |
| Halbert (2006a) <sup>58</sup> | USA                            | Longitudinal    |              | •       |                 |                     | Dairy cows (Faeces)                    | Farm            | Isolate (1,216)      |                    |                   | •                  |                     |       | Both                               |
| Halbert (2006b) <sup>59</sup> | USA                            | Longitudinal    |              | •       |                 |                     | Dairy cows (Environment, faeces, milk) | Farm            | Isolate (2,030)      |                    |                   | •                  |                     |       | Phenotypic                         |
| Hammerum (2007) <sup>60</sup> | Denmark                        | Longitudinal    | •            |         |                 |                     | Broilers, pigs (Faeces, meat)          | Slaughter       | NR                   |                    | •                 |                    |                     |       | Phenotypic                         |
| Han (2009) <sup>61</sup>      | USA                            | Longitudinal    |              | •       |                 |                     | Broilers (Meat)                        | Retail          | Isolate (165)        |                    |                   | •                  |                     |       | Phenotypic                         |
| Harper (2009) <sup>62</sup>   | USA                            | Cross-sectional |              | •       |                 |                     | Pigs (Nasal swab)                      | Farm            | Sample (312)         |                    |                   |                    | •                   |       | Phenotypic                         |
| Harvey (2009) <sup>63</sup>   | USA                            | Cross-sectional |              | •       |                 |                     | Beef cows (Faeces)                     | Farm            | Sample (122)         | NR                 |                   |                    |                     |       | Genotypic                          |
| Hässig (2014) <sup>64</sup>   | Switzerland                    | Longitudinal    | •            |         |                 |                     | Beef cows (Faeces, nasal swab)         | Farm            | Farm (1,847)         | •                  | •                 |                    | •                   | •     | Phenotypic                         |
| Heuer (2001) <sup>65</sup>    | Denmark                        | Longitudinal    |              | •       |                 |                     | Broilers (Cloacal)                     | Slaughter       | Flock (160)          |                    |                   | •                  |                     |       | Phenotypic                         |
| Heuer (2002) <sup>66</sup>    | Denmark                        | Longitudinal    | •            | •       |                 |                     | Broilers (Cloacal)                     | Slaughter       | Flock (162)          |                    | •                 |                    |                     |       | Both                               |
| Hiki (2015) <sup>67</sup>     | Japan                          | Longitudinal    |              |         | •               |                     | Broilers (Faeces)                      | Farm            | Isolate (693)        | •                  |                   |                    |                     |       | Both                               |

Table 1 (continued)

| First author (Year)             | Country         | Study design    | Intervention |         |                 |                     | Population sampled (Sample type)                            | Sample point      | Unit of analysis (n)  | Bacteria studied   |                   |                    |                     |       |                                    |
|---------------------------------|-----------------|-----------------|--------------|---------|-----------------|---------------------|-------------------------------------------------------------|-------------------|-----------------------|--------------------|-------------------|--------------------|---------------------|-------|------------------------------------|
|                                 |                 |                 | External ban | Organic | Antibiotic free | Voluntary reduction |                                                             |                   |                       | Enterobacteriaceae | Enterococcus spp. | Campylobacter spp. | Staphylococcus spp. | Other | Genotypic or phenotypic resistance |
| Hiroi (2012) <sup>68</sup>      | Japan           | Cross-sectional |              |         | •               |                     | Broilers (Faeces)                                           | Farm              | Bird (32)             | •                  |                   |                    |                     |       | Genotypic                          |
| Hoogenboom (2008) <sup>69</sup> | The Netherlands | Cross-sectional |              | •       |                 |                     | Broilers, cattle, laying hens, pigs (carcass, eggs, faeces) | Farm, slaughter   | Not specified (MARAN) | •                  | •                 | •                  |                     |       | Phenotypic                         |
| Huijbers (2015) <sup>70</sup>   | The Netherlands | Longitudinal    |              | •       |                 |                     | Broilers (Cloacal, environmental, throat swab)              | Farm              | Isolate (49)          | •                  |                   |                    | •                   |       | Both                               |
| Jensen (2014) <sup>71</sup>     | Denmark         | Longitudinal    | •            |         |                 |                     | Pigs (Faeces)                                               | DANMAP            | Isolate (DANMAP)      | •                  |                   |                    |                     |       | Phenotypic                         |
| Johnson (2007) <sup>72</sup>    | USA             | Cross-sectional |              |         | •               |                     | Chicken, turkeys (Meat)                                     | Retail, slaughter | Isolate (401)         | •                  |                   |                    |                     |       | Phenotypic                         |
| Johnston (2002) <sup>73</sup>   | USA             | Cross-sectional |              | •       |                 |                     | Dairy cows (Faeces)                                         | Farm              | Isolate (180)         | NR                 |                   |                    |                     |       | Phenotypic                         |
| Joseph (2007) <sup>74</sup>     | USA             | Cross-sectional |              | •       | •               |                     | Poultry (Environment)                                       | Farm              | Isolate (702)         |                    | •                 |                    |                     |       | Phenotypic                         |
| Joseph (2008) <sup>75</sup>     | USA             | Cross-sectional |              | •       | •               |                     | Broilers (Environment)                                      | Farm              | Isolate (802)         | •                  |                   |                    |                     |       | Phenotypic                         |
| Kassem (2017) <sup>76</sup>     | USA             | Cross-sectional |              | •       |                 |                     | Laying hens (Faeces)                                        | Farm              | Isolate (248)         |                    |                   | •                  |                     |       | Both                               |
| Keelara (2013) <sup>77</sup>    | USA             | Longitudinal    |              |         | •               |                     | Pigs (Environment, faeces, meat, mesenteric lymph nodes)    | Farm, slaughter   | Isolate (1,090)       | •                  |                   |                    |                     |       | Phenotypic                         |
| Kerouanton (2014) <sup>78</sup> | France          | Cross-sectional |              | •       |                 |                     | Pigs (Faeces)                                               | Slaughter         | Isolate (373)         | •                  |                   |                    |                     |       | Phenotypic                         |

Table 1 (continued)

| First author (Year)                  | Country           | Study design         | Intervention |         |                 |                     | Population sampled (Sample type)                | Sample point    | Unit of analysis (n) | Bacteria studied   |                          |                           |                            | Genotypic or phenotypic resistance |
|--------------------------------------|-------------------|----------------------|--------------|---------|-----------------|---------------------|-------------------------------------------------|-----------------|----------------------|--------------------|--------------------------|---------------------------|----------------------------|------------------------------------|
|                                      |                   |                      | External ban | Organic | Antibiotic free | Voluntary reduction |                                                 |                 |                      | Enterobacteriaceae | <i>Enterococcus</i> spp. | <i>Campylobacter</i> spp. | <i>Staphylococcus</i> spp. |                                    |
| Khachatryan (2006) <sup>79</sup>     | USA               | Non-randomized trial |              |         |                 | •                   | Dairy cows (Faeces)                             | Farm            | Isolate (75)         | •                  |                          |                           |                            | Phenotypic                         |
| Kieke (2006) <sup>80</sup>           | USA               | Cross-sectional      |              |         | •               |                     | Poultry (Meat)                                  | Retail          | Isolate (100)        | •                  |                          |                           |                            | Both                               |
| Kilonzo-Nthenge (2015) <sup>81</sup> | USA               | Cross-sectional      |              | •       |                 |                     | Broilers (Meat)                                 | Retail          | Isolate (343)        | •                  |                          |                           |                            | Phenotypic                         |
| Kola (2012) <sup>82</sup>            | Germany           | Cross-sectional      |              | •       |                 |                     | Broilers (Meat)                                 | Retail          | Isolate (185)        | •                  |                          |                           |                            | Both                               |
| Kruse (1999) <sup>83</sup>           | Norway            | Longitudinal         | •            |         |                 |                     | Broilers, turkey, pigs (Carcass, faeces)        | Farm, slaughter | Isolate (247)        | •                  |                          |                           |                            | Both                               |
| Kühn (2005) <sup>84</sup>            | Spain, Sweden, UK | Cross-sectional      | •            |         |                 |                     | Beef cows, broilers, pigs (Environment, faeces) | Farm            | Sample (2,580)       | •                  |                          |                           |                            | Both                               |
| Lam (2012) <sup>85</sup>             | The Netherlands   | Longitudinal         | •            |         |                 |                     | Dairy cows (Faeces, milk)                       | MARAN           | Isolate (MARAN)      | •                  | •                        | •                         |                            | Both                               |
| Langlois (1983) <sup>86</sup>        | USA               | Longitudinal         |              |         | •               |                     | Pigs (Faeces)                                   | Farm            | Isolate (3,094)      | •                  |                          |                           |                            | Phenotypic                         |
| Langlois (1986) <sup>87</sup>        | USA               | Longitudinal         |              |         | •               |                     | Pigs (Faeces, rectal swab)                      | Farm            | Isolate (7,343)      | •                  |                          |                           |                            | Phenotypic                         |
| Larsen (1975) <sup>88</sup>          | Denmark           | Longitudinal         | •            |         |                 |                     | Pigs (Faeces)                                   | Farm            | Isolate (443)        | •                  |                          |                           |                            | Phenotypic                         |
| Lauderdale (2007) <sup>89</sup>      | Taiwan            | Longitudinal         | •            |         |                 |                     | Chicken (Faeces)                                | Farm            | Isolate (1,988)      | •                  |                          |                           |                            | Both                               |



Table 1 (continued)

| First author (Year)               | Country     | Study design         | Intervention |         |                 |                     | Population sampled (Sample type) | Sample point | Unit of analysis (n) | Bacteria studied   |                   |                    |                     |       |                                    |
|-----------------------------------|-------------|----------------------|--------------|---------|-----------------|---------------------|----------------------------------|--------------|----------------------|--------------------|-------------------|--------------------|---------------------|-------|------------------------------------|
|                                   |             |                      | External ban | Organic | Antibiotic free | Voluntary reduction |                                  |              |                      | Enterobacteriaceae | Enterococcus spp. | Campylobacter spp. | Staphylococcus spp. | Other | Genotypic or phenotypic resistance |
| Lebek (1979) <sup>90</sup>        | Switzerland | Cross-sectional      | •            |         |                 |                     | Dairy cows (Faeces)              | Farm         | Isolate (63)         | •                  |                   |                    |                     |       | Phenotypic                         |
| Lee (2013) <sup>91</sup>          | South Korea | Cross-sectional      |              | •       |                 |                     | Chicken (Eggs)                   | Farm         | Isolate (26)         | •                  |                   |                    |                     |       | Phenotypic                         |
| LeJeune (2004) <sup>92</sup>      | USA         | Cross-sectional      |              |         | •               |                     | Beef cows (Meat)                 | Retail       | Isolate (150)        | •                  | •                 |                    |                     |       | Phenotypic                         |
| Lenart-Boron (2016) <sup>93</sup> | Poland      | Cross-sectional      |              | •       |                 |                     | Broilers (Faeces)                | Farm         | Isolate (98)         | •                  |                   |                    |                     |       | Both                               |
| Lestari (2009) <sup>94</sup>      | USA         | Cross-sectional      |              | •       |                 |                     | Broilers (Meat)                  | Retail       | Isolate (126)        | •                  |                   |                    |                     |       | Phenotypic                         |
| Looft (2012) <sup>95</sup>        | USA         | Non-randomized trial |              |         |                 | •                   | Pigs (Faeces)                    | Farm         | Sequence (133,294)   | •                  |                   |                    | •                   |       | Genotypic                          |
| Lou (1995) <sup>96</sup>          | USA         | Cross-sectional      |              |         |                 | •                   | Pigs (Faeces)                    | Farm         | Isolate (2,931)      | •                  |                   |                    |                     |       | Genotypic                          |
| Luangtongkum (2006) <sup>97</sup> | USA         | Cross-sectional      |              | •       |                 |                     | Broilers, turkey (Faeces)        | Slaughter    | Isolate (694)        |                    |                   | •                  |                     |       | Phenotypic                         |
| Mathew (2001) <sup>98</sup>       | USA         | Cross-sectional      |              |         | •               |                     | Pigs (Faeces)                    | Farm         | Isolate (NR)         | •                  |                   |                    |                     |       | Phenotypic                         |
| Mazengia (2014) <sup>99</sup>     | USA         | Cross-sectional      |              | •       | •               |                     | Poultry (Meat)                   | Retail       | Isolate (106)        | •                  |                   |                    |                     |       | Phenotypic                         |
| Meemken (2009) <sup>100</sup>     | Germany     | Cross-sectional      |              | •       |                 |                     | Pigs (Nasal swab)                | Farm         | Animal (678)         |                    |                   |                    | •                   |       | Phenotypic                         |

Table 1 (continued)

| First author (Year)              | Country     | Study design    | Intervention |         |                 |                     | Population sampled (Sample type) | Sample point | Unit of analysis (n) | Bacteria studied   |                          |                           |                            |       |                                    |
|----------------------------------|-------------|-----------------|--------------|---------|-----------------|---------------------|----------------------------------|--------------|----------------------|--------------------|--------------------------|---------------------------|----------------------------|-------|------------------------------------|
|                                  |             |                 | External ban | Organic | Antibiotic free | Voluntary reduction |                                  |              |                      | Enterobacteriaceae | <i>Enterococcus</i> spp. | <i>Campylobacter</i> spp. | <i>Staphylococcus</i> spp. | Other | Genotypic or phenotypic resistance |
| Mehboob (2003) <sup>101</sup>    | NR          | Cross-sectional | •            |         |                 |                     | Pigs (Environment, faeces)       | Farm         | Sample (30)          | NR                 |                          |                           |                            |       | Genotypic                          |
| Millar (2007) <sup>102</sup>     | New Zealand | Cross-sectional | •            |         |                 |                     | Chicken (Meat)                   | Retail       | Animal (6)           |                    | •                        |                           |                            |       | Phenotypic                         |
| Millman (2013) <sup>103</sup>    | USA         | Cross-sectional | •            | •       |                 |                     | Chicken (Meat)                   | Retail       | Isolate (213)        | •                  |                          |                           |                            |       | Phenotypic                         |
| Miranda (2007) <sup>104</sup>    | Spain       | Cross-sectional | •            |         |                 |                     | Chicken (Meat)                   | Retail       | Isolate (180)        |                    | •                        |                           |                            |       | Phenotypic                         |
| Miranda (2008a) <sup>105</sup>   | Spain       | Cross-sectional | •            |         |                 |                     | Chicken (Meat)                   | Retail       | Isolate (180)        | •                  |                          |                           |                            |       | Phenotypic                         |
| Miranda (2008b) <sup>106</sup>   | Spain       | Cross-sectional | •            |         |                 |                     | Pigs (Meat)                      | Retail       | Isolate (180)        | •                  |                          |                           |                            |       | Phenotypic                         |
| Miranda (2008c) <sup>107</sup>   | Spain       | Cross-sectional | •            |         |                 |                     | Chicken (Meat)                   | Retail       | Isolate (483)        | •                  |                          | •                         | •                          |       | Phenotypic                         |
| Miranda (2009a) <sup>108</sup>   | Spain       | Cross-sectional | •            |         |                 |                     | Beef cows (Meat)                 | Slaughter    | Isolate (180)        | •                  |                          | •                         | •                          |       | Phenotypic                         |
| Miranda (2009b) <sup>109</sup>   | Spain       | Cross-sectional | •            |         |                 |                     | Dairy cows (Cheese)              | Retail       | Isolate (568)        | •                  |                          | •                         | •                          |       | Phenotypic                         |
| Miranda CD (2007) <sup>110</sup> | Chile       | Cross-sectional |              |         | •               |                     | Salmon (Environment, fingerling) | Farm         | Isolate (70)         | •                  |                          |                           |                            |       | Phenotypic                         |

Table 1 (continued)

| First author (Year)               | Country     | Study design    | Intervention |         |                 |                     | Population sampled (Sample type)   | Sample point    | Unit of analysis (n) | Bacteria studied   |                          |                           |                            | Genotypic or phenotypic resistance |
|-----------------------------------|-------------|-----------------|--------------|---------|-----------------|---------------------|------------------------------------|-----------------|----------------------|--------------------|--------------------------|---------------------------|----------------------------|------------------------------------|
|                                   |             |                 | External ban | Organic | Antibiotic free | Voluntary reduction |                                    |                 |                      | Enterobacteriaceae | <i>Enterococcus</i> spp. | <i>Campylobacter</i> spp. | <i>Staphylococcus</i> spp. |                                    |
| Mitchell (2004) <sup>111</sup>    | USA         | Cross-sectional |              | •       |                 |                     | Dairy cows (Environmental, faeces) | Farm            | Isolate (1,518)      | •                  |                          |                           |                            | Phenotypic                         |
| Mollenkopf (2014) <sup>112</sup>  | USA         | Cross-sectional |              | •       | •               |                     | Chicken (Meat)                     | Retail          | Sample (231)         | •                  | •                        |                           |                            | Both                               |
| Morley (2011) <sup>113</sup>      | USA         | Cross-sectional |              |         | •               |                     | Beef cows (Faeces)                 | Farm            | Isolate (8,882)      | •                  |                          |                           |                            | Phenotypic                         |
| Nannapaneni (2009) <sup>114</sup> | USA         | Longitudinal    | •            |         |                 |                     | Chicken (Meat)                     | Retail          | Animal (744)         |                    | •                        |                           |                            | Phenotypic                         |
| Noormohamed (2014) <sup>115</sup> | USA         | Cross-sectional |              | •       |                 |                     | Chicken (Meat)                     | Retail          | Isolate (149)        |                    | •                        |                           |                            | Phenotypic                         |
| Norby (2003) <sup>116</sup>       | USA         | Cross-sectional |              |         | •               |                     | Pigs (Faeces)                      | Farm            | Farm (72)            |                    | •                        |                           |                            | Phenotypic                         |
| Nugent (2001) <sup>117</sup>      | USA         | Cross-sectional |              | •       |                 |                     | Dairy cows (Milk)                  | Farm            | Isolate (180)        |                    |                          | •                         |                            | Phenotypic                         |
| Nulsen (2008) <sup>118</sup>      | New Zealand | Cross-sectional |              | •       |                 |                     | Pigs (Faeces)                      | Farm            | Isolate (728)        | •                  | •                        |                           |                            | Phenotypic                         |
| Nwankwo (2014) <sup>119</sup>     | Nigeria     | Cross-sectional |              |         | •               |                     | Chicken (Cloacal)                  | Farm            | Isolate (45)         | •                  |                          |                           |                            | Phenotypic                         |
| Obeng (2012) <sup>120</sup>       | Australia   | Cross-sectional |              |         | •               |                     | Broiler (Faeces)                   | Farm, slaughter | Isolate (251)        | •                  |                          |                           |                            | Both                               |
| O'Brien (2012) <sup>121</sup>     | USA         | Cross-sectional |              |         | •               |                     | Pigs (Meat)                        | Retail          | Isolate (256)        |                    |                          | •                         |                            | Both                               |
| O'Neill (2010) <sup>122</sup>     | UK          | Cross-sectional |              | •       |                 |                     | Dairy cows (Milk)                  | Farm            | Isolate (161)        |                    |                          | •                         |                            | Both                               |

Table 1 (continued)

| First author (Year)             | Country                        | Study design    | Intervention |         |                 |                     | Population sampled (Sample type)                                     | Sample point    | Unit of analysis (n) | Bacteria studied   |                          |                           |                            |       |                                    |            |
|---------------------------------|--------------------------------|-----------------|--------------|---------|-----------------|---------------------|----------------------------------------------------------------------|-----------------|----------------------|--------------------|--------------------------|---------------------------|----------------------------|-------|------------------------------------|------------|
|                                 |                                |                 | External ban | Organic | Antibiotic free | Voluntary reduction |                                                                      |                 |                      | Enterobacteriaceae | <i>Enterococcus</i> spp. | <i>Campylobacter</i> spp. | <i>Staphylococcus</i> spp. | Other | Genotypic or phenotypic resistance |            |
| Osadebe (2012) <sup>123</sup>   | USA                            | Cross-sectional |              |         |                 | •                   | Pigs (Nasal swab)                                                    | Farm            | Sample (263)         |                    |                          |                           |                            |       | •                                  | Phenotypic |
| Österberg (2016) <sup>124</sup> | Denmark, France, Italy, Sweden | Cross-sectional |              | •       |                 |                     | Pigs (Faeces)                                                        | Farm, slaughter | Isolate (590)        | •                  |                          |                           |                            |       |                                    | Phenotypic |
| Pantosti (1999) <sup>125</sup>  | Italy                          | Longitudinal    | •            |         |                 |                     | Poultry (Meat)                                                       | Slaughter       | Sample (605)         | •                  |                          |                           |                            |       |                                    | Both       |
| Park (2012) <sup>126</sup>      | USA                            | Longitudinal    |              | •       |                 |                     | Dairy cows (Milk)                                                    | Farm            | Isolate (257)        | •                  |                          |                           | •                          | •     |                                    | Phenotypic |
| Patchanee (2008) <sup>127</sup> | USA                            | Cross-sectional |              |         |                 | •                   | Pigs (Faeces)                                                        | Farm            | Isolate (711)        | •                  |                          |                           |                            |       |                                    | Phenotypic |
| Peng (2016) <sup>128</sup>      | USA                            | Cross-sectional |              | •       | •               |                     | Broilers, cows, goats, laying hens, pigs (Eggs, environment, faeces) | Farm, retail    | Isolate (300)        | •                  |                          |                           |                            |       |                                    | Phenotypic |
| Pettey (2008) <sup>129</sup>    | USA                            | Cross-sectional |              |         |                 | •                   | Pigs (Environment, faeces)                                           | Farm            | Isolate (242)        |                    |                          |                           |                            |       | •                                  | Both       |
| Pol (2007) <sup>130</sup>       | USA                            | Cross-sectional |              | •       |                 |                     | Dairy cows (Milk)                                                    | Farm            | Isolate (2,503)      |                    |                          |                           |                            | •     | •                                  | Phenotypic |
| Price (2005) <sup>131</sup>     | USA                            | Cross-sectional |              |         |                 | •                   | Chicken (Meat)                                                       | Retail          | Isolate (76)         |                    |                          | •                         |                            |       |                                    | Both       |
| Price (2007) <sup>132</sup>     | USA                            | Cross-sectional |              |         |                 | •                   | Chicken (Meat)                                                       | Retail          | Isolate (329)        |                    |                          | •                         |                            |       |                                    | Phenotypic |

Table 1 (continued)

| First author (Year)             | Country     | Study design    | Intervention |         |                 |                     | Population sampled (Sample type)                                                    | Sample point | Unit of analysis (n) | Bacteria studied   |                          |                           |                            |       |                                    |
|---------------------------------|-------------|-----------------|--------------|---------|-----------------|---------------------|-------------------------------------------------------------------------------------|--------------|----------------------|--------------------|--------------------------|---------------------------|----------------------------|-------|------------------------------------|
|                                 |             |                 | External ban | Organic | Antibiotic free | Voluntary reduction |                                                                                     |              |                      | Enterobacteriaceae | <i>Enterococcus</i> spp. | <i>Campylobacter</i> spp. | <i>Staphylococcus</i> spp. | Other | Genotypic or phenotypic resistance |
| Ray (2006) <sup>133</sup>       | USA         | Cross-sectional | •            |         |                 |                     | Dairy cows (Environment, faeces, flank swab, milk tank and filter)                  | Farm         | Farm (129)           | •                  |                          |                           |                            |       | Phenotypic                         |
| Reinstein (2009) <sup>134</sup> | USA         | Cross-sectional |              |         | •               |                     | Beef cows (Faeces, rectal swab)                                                     | Slaughter    | Isolate (60)         | •                  |                          |                           |                            |       | Phenotypic                         |
| Roesch (2006) <sup>135</sup>    | Switzerland | Cross-sectional | •            |         |                 |                     | Dairy cows (Milk)                                                                   | Farm         | Isolate (158)        |                    |                          | •                         | •                          |       | Phenotypic                         |
| Rollo (2010) <sup>136</sup>     | USA         | Cross-sectional |              |         | •               |                     | Pigs (Faeces)                                                                       | Farm         | Isolate (512)        |                    |                          | •                         |                            |       | Phenotypic                         |
| Rossa (2013) <sup>137</sup>     | Brazil      | Cross-sectional | •            |         |                 |                     | Chicken (Meat)                                                                      | Retail       | Isolate (133)        | •                  |                          |                           |                            |       | Phenotypic                         |
| Salaheen (2016) <sup>138</sup>  | USA         | Cross-sectional | •            | •       |                 |                     | Broilers, chicken, cows, goats, laying hens, pigs (Eggs, environment, faeces, meat) | Farm, retail | Isolate (222)        |                    |                          | •                         |                            |       | Phenotypic                         |
| Sanchez (2015) <sup>139</sup>   | USA         | Cross-sectional | •            | •       |                 |                     | Chicken (Meat)                                                                      | Retail       | Isolate (381)        | •                  |                          |                           |                            |       | Phenotypic                         |
| Sapkota (2010) <sup>140</sup>   | USA         | Cross-sectional | •            |         |                 |                     | Poultry (Environment)                                                               | Farm         | Isolate (100)        | •                  |                          |                           |                            |       | Phenotypic                         |
| Sapkota (2011) <sup>141</sup>   | USA         | Cross-sectional | •            |         |                 |                     | Broilers (Environment, faeces)                                                      | Farm         | Isolate (259)        | •                  |                          |                           |                            |       | Phenotypic                         |

Table 1 (continued)

| First author (Year)                   | Country      | Study design    | Intervention |         |                 |                     | Population sampled (Sample type) | Sample point | Unit of analysis (n) | Bacteria studied   |                          |                           |                            |       |                                    |
|---------------------------------------|--------------|-----------------|--------------|---------|-----------------|---------------------|----------------------------------|--------------|----------------------|--------------------|--------------------------|---------------------------|----------------------------|-------|------------------------------------|
|                                       |              |                 | External ban | Organic | Antibiotic free | Voluntary reduction |                                  |              |                      | Enterobacteriaceae | <i>Enterococcus</i> spp. | <i>Campylobacter</i> spp. | <i>Staphylococcus</i> spp. | Other | Genotypic or phenotypic resistance |
| Sapkota (2014) <sup>142</sup>         | USA          | Cross-sectional |              |         |                 |                     | Broilers (Environment, faeces)   | Farm         | Isolate (103)        | •                  |                          |                           |                            |       | Phenotypic                         |
| Sato (2004a) <sup>143</sup>           | USA          | Cross-sectional |              |         |                 |                     | Dairy cows (Faeces)              | Farm         | Isolate (332)        |                    |                          | •                         |                            |       | Phenotypic                         |
| Sato (2004b) <sup>144</sup>           | Denmark, USA | Cross-sectional |              |         |                 |                     | Dairy cows (Milk)                | Farm         | Isolate (483)        |                    |                          |                           | •                          |       | Phenotypic                         |
| Sato (2005) <sup>145</sup>            | USA          | Cross-sectional |              |         |                 |                     | Dairy cows (Faeces)              | Farm         | Isolate (1,121)      | •                  |                          |                           |                            |       | Phenotypic                         |
| Schmidt (2015) <sup>146</sup>         | NR           | Longitudinal    |              |         |                 | •                   | Beef cows (Faeces)               | Slaughter    | Sample (719)         | •                  | •                        |                           |                            |       | Phenotypic                         |
| Schwaiger (2008) <sup>147</sup>       | Germany      | Cross-sectional |              |         |                 |                     | Laying hens (Cloacal, eggs)      | Farm         | Isolate (910)        | •                  |                          | •                         |                            |       | Phenotypic                         |
| Schwaiger (2010) <sup>148</sup>       | Germany      | Cross-sectional |              |         |                 |                     | Laying hens (Cloacal, eggs)      | Farm         | Isolate (1,003)      |                    |                          | •                         |                            | •     | Phenotypic                         |
| Siemon (2007) <sup>149</sup>          | USA          | Cross-sectional |              |         |                 | •                   | Broilers (Faeces)                | Farm         | Isolate (350)        | •                  |                          |                           |                            |       | Phenotypic                         |
| Sischo (2010) <sup>150</sup>          | NR           | Cross-sectional |              |         |                 | •                   | Dairy cows (Faeces)              | Farm         | Isolate (670)        | •                  |                          |                           |                            |       | Phenotypic                         |
| Skjøl-Rasmussen (2009) <sup>151</sup> | Denmark      | Longitudinal    | •            |         |                 |                     | Broilers, chicken (Faeces, meat) | Farm, Retail | Isolate (2,711)      |                    |                          | •                         |                            |       | Phenotypic                         |
| Smith (1981) <sup>152</sup>           | UK           | Longitudinal    | •            |         |                 |                     | Broilers, pigs (Faeces)          | Farm         | Sample (200)         | •                  |                          |                           |                            |       | Phenotypic                         |
| Smith (2013) <sup>153</sup>           | USA          | Cross-sectional |              |         |                 | •                   | Pigs (Nasal swab)                | Farm         | Animal (1.085)       |                    |                          |                           | •                          |       | Phenotypic                         |

Table 1 (continued)

| First author (Year)                    | Country         | Study design    | Intervention |         |                 |                     | Population sampled (Sample type) | Sample point    | Unit of analysis (n) | Bacteria studied   |                          |                           |                            |       |                                    |
|----------------------------------------|-----------------|-----------------|--------------|---------|-----------------|---------------------|----------------------------------|-----------------|----------------------|--------------------|--------------------------|---------------------------|----------------------------|-------|------------------------------------|
|                                        |                 |                 | External ban | Organic | Antibiotic free | Voluntary reduction |                                  |                 |                      | Enterobacteriaceae | <i>Enterococcus</i> spp. | <i>Campylobacter</i> spp. | <i>Staphylococcus</i> spp. | Other | Genotypic or phenotypic resistance |
| Soonthornchaikul (2006) <sup>154</sup> | UK              | Cross-sectional | •            |         |                 |                     | Chicken (Meat)                   | Retail          | Isolate (NR)         |                    | •                        |                           |                            |       | Phenotypic                         |
| Sørum (2004) <sup>155</sup>            | Norway          | Cross-sectional | •            |         |                 |                     | Chicken, turkeys (Faeces)        | Farm            | Isolate (94)         |                    | •                        |                           |                            |       | Phenotypic                         |
| Sørum (2006) <sup>156</sup>            | Norway          | Longitudinal    | •            |         |                 |                     | Broilers, turkeys (Faeces)       | Farm            | Sample (109)         |                    | •                        |                           |                            |       | Both                               |
| Stegeman (2006) <sup>157</sup>         | The Netherlands | Longitudinal    | •            |         |                 |                     | Broilers (Caecal)                | Slaughter       | Sample (833)         |                    | •                        |                           |                            |       | Phenotypic                         |
| Struve (2010) <sup>158</sup>           | Denmark         | Cross-sectional |              | •       | •               |                     | Pigs (Caecal)                    | Slaughter       | Isolate (868)        | •                  |                          |                           |                            |       | Phenotypic                         |
| Suriyasathaporn (2010) <sup>159</sup>  | Thailand        | Longitudinal    | •            |         |                 |                     | Dairy cows (Milk)                | Farm            | Isolate (140)        | •                  |                          | •                         | •                          |       | Phenotypic                         |
| Tadesse (2009) <sup>160</sup>          | USA             | Cross-sectional |              |         | •               |                     | Pigs (Faeces, meat)              | Farm, slaughter | Isolate (1,429)      | •                  |                          | •                         |                            |       | Phenotypic                         |
| Tamang (2015) <sup>161</sup>           | South Korea     | Cross-sectional | •            |         |                 |                     | Pigs (Faeces)                    | Farm            | Isolate (100)        | •                  |                          |                           |                            |       | Both                               |
| Teramoto (2016) <sup>162</sup>         | USA             | Cross-sectional | •            |         |                 |                     | Chicken (Meat)                   | Retail          | Isolate (24)         |                    |                          |                           | •                          |       | Both                               |
| Thakur (2005) <sup>163</sup>           | USA             | Cross-sectional |              |         | •               |                     | Pigs (Carcass swab, faeces)      | Farm, slaughter | Isolate (1,459)      |                    |                          | •                         |                            |       | Phenotypic                         |
| Tikofsky (2003) <sup>164</sup>         | USA             | Cross-sectional | •            |         |                 |                     | Dairy cows (Milk)                | Farm            | Isolate (261)        |                    |                          |                           | •                          |       | Phenotypic                         |
| Tragesser (2006) <sup>165</sup>        | USA             | Cross-sectional |              |         |                 | •                   | Dairy cows (Faeces)              | Farm            | Herd (18)            | •                  |                          |                           |                            |       | Both                               |

Table 1 (continued)

| First author (Year)                   | Country         | Study design    | Intervention |         |                 |                     | Population sampled (Sample type)          | Sample point      | Unit of analysis (n) | Bacteria studied   |                          |                           |                            |       | Genotypic or phenotypic resistance |
|---------------------------------------|-----------------|-----------------|--------------|---------|-----------------|---------------------|-------------------------------------------|-------------------|----------------------|--------------------|--------------------------|---------------------------|----------------------------|-------|------------------------------------|
|                                       |                 |                 | External ban | Organic | Antibiotic free | Voluntary reduction |                                           |                   |                      | Enterobacteriaceae | <i>Enterococcus</i> spp. | <i>Campylobacter</i> spp. | <i>Staphylococcus</i> spp. | Other |                                    |
| Trost (2013) <sup>166</sup>           | NR              | Cross-sectional | •            |         |                 |                     | Chickens (Faeces, tracheal)               | Farm              | Isolate (148)        | •                  |                          |                           |                            |       | Phenotypic                         |
| Truszczyński (2006) <sup>167</sup>    | Denmark         | Longitudinal    |              |         |                 | •                   | Beef cows, broilers, pigs (DANMAP)        | Farm              | Isolate (DANMAP)     |                    | •                        |                           |                            |       | Phenotypic                         |
| van den Bogaard (2000) <sup>168</sup> | The Netherlands | Longitudinal    | •            |         |                 |                     | Broilers, pigs (Faeces)                   | Farm              | Sample (548)         |                    | •                        |                           |                            |       | Phenotypic                         |
| van den Bogaard (2001) <sup>169</sup> | The Netherlands | Cross-sectional |              |         |                 | •                   | Broilers, laying hens, turkeys (Faeces)   | Farm              | Isolate (122)        | •                  |                          |                           |                            |       | Phenotypic                         |
| Veldman (2014) <sup>170</sup>         | The Netherlands | Longitudinal    | •            |         |                 |                     | Broilers, dairy cows, pigs, veal (Faeces) | Farm              | Isolate (NR)         | •                  | •                        | •                         |                            |       | Phenotypic                         |
| Walk (2007) <sup>171</sup>            | USA             | Cross-sectional | •            |         |                 |                     | Dairy cows (Faeces)                       | Farm              | Isolate (678)        | •                  |                          |                           |                            |       | Genotypic                          |
| Wanninger (2016) <sup>172</sup>       | Switzerland     | Cross-sectional |              |         |                 | •                   | Pigs (Faeces, conjunctival swab)          | Farm              | Isolate (18)         |                    |                          |                           |                            | •     | Both                               |
| Warnick (2015) <sup>173</sup>         | USA             | Cross-sectional | •            |         |                 |                     | Dairy cows (Environmental, faeces)        | Farm              | Isolate (1,518)      | •                  |                          |                           |                            |       | Phenotypic                         |
| Wyckoff (2012) <sup>174</sup>         | USA             | Longitudinal    | •            |         |                 |                     | Dairy cows (Milk)                         | Farm              | Isolate (904)        |                    |                          |                           | •                          |       | Phenotypic                         |
| Zawack (2016) <sup>175</sup>          | USA             | Longitudinal    | •            |         |                 |                     | Chicken (Caecal, meat)                    | Slaughter, retail | Isolate (NR)         | •                  |                          | •                         |                            |       | Phenotypic                         |



Table 1 (continued)

| First author (Year)             | Country | Study design    | Intervention |         |                 |                     | Population sampled (Sample type) | Sample point | Unit of analysis (n) | Bacteria studied   |                          |                           |                            |       |                                    |
|---------------------------------|---------|-----------------|--------------|---------|-----------------|---------------------|----------------------------------|--------------|----------------------|--------------------|--------------------------|---------------------------|----------------------------|-------|------------------------------------|
|                                 |         |                 | External ban | Organic | Antibiotic free | Voluntary reduction |                                  |              |                      | Enterobacteriaceae | <i>Enterococcus</i> spp. | <i>Campylobacter</i> spp. | <i>Staphylococcus</i> spp. | Other | Genotypic or phenotypic resistance |
| Zhang (2005) <sup>176</sup>     | USA     | Cross-sectional | •            |         |                 |                     | Chicken (Meat)                   | Retail       | Isolate (71)         |                    |                          |                           |                            | •     | Both                               |
| Zhang (2010) <sup>177</sup>     | USA     | Cross-sectional |              |         | •               |                     | Beef cows (Meat)                 | Retail       | Isolate (NR)         | •                  | •                        |                           |                            |       | Phenotypic                         |
| Zhang (2011) <sup>178</sup>     | USA     | Cross-sectional |              |         | •               |                     | Chicken (Meat)                   | Retail       | Isolate (329)        | •                  | •                        |                           |                            |       | Phenotypic                         |
| Zwonitzer (2016) <sup>179</sup> | USA     | Cross-sectional | •            |         |                 |                     | Pigs (Faeces)                    | Farm         | Isolate (491)        | •                  |                          |                           |                            |       | Phenotypic                         |

Abbreviations: DANMAP - Danish Integrated Antimicrobial Resistance Monitoring and Research Programme; MARAN - Monitoring of Antimicrobial Resistance and Antibiotic Usage in Animals in the Netherlands; NR - not reported; UK - United Kingdom; USA - United States of America

**Table 2: Study characteristics of individual human studies**

| First author (year)                            | Country         | Study design    | Intervention |         |                 |                     | Population sampled (Sample type)                                                       | Sample point           | Unit of analysis (n)          | Bacteria studied   |                          |                           |                            | Genotypic or phenotypic resistance |
|------------------------------------------------|-----------------|-----------------|--------------|---------|-----------------|---------------------|----------------------------------------------------------------------------------------|------------------------|-------------------------------|--------------------|--------------------------|---------------------------|----------------------------|------------------------------------|
|                                                |                 |                 | External ban | Organic | Antibiotic free | Voluntary reduction |                                                                                        |                        |                               | Enterobacteriaceae | <i>Enterococcus</i> spp. | <i>Campylobacter</i> spp. | <i>Staphylococcus</i> spp. |                                    |
| Borgen (2000) <sup>22</sup>                    | Norway          | Cross-sectional | •            |         |                 |                     | Poultry producers (Faeces)                                                             | Farm                   | Sample (147)                  |                    | •                        |                           |                            | Both                               |
| Coalition for animal health (NR) <sup>33</sup> | Denmark         | Longitudinal    | •            |         |                 |                     | (Not specified) DANMAP                                                                 | (Not specified) DANMAP | (Not specified) DANMAP        | •                  | •                        | •                         |                            | Phenotypic                         |
| Cuny (2012) <sup>37</sup>                      | Germany         | Cross-sectional |              |         | •               |                     | Humans working or living on pig farms (Nasal swabs)                                    | Farm                   | Human (202)                   |                    |                          |                           | •                          | Phenotypic                         |
| Dorado-García (2015a) <sup>43</sup>            | The Netherlands | Longitudinal    |              |         |                 | •                   | Farmers, employees and family members (Nasal swabs)                                    | Farm                   | Sample (158)                  |                    |                          |                           | •                          | Phenotypic                         |
| Dorado-García (2015b) <sup>44</sup>            | The Netherlands | Longitudinal    |              |         |                 | •                   | Farmers, employees and family members (Nasal swabs)                                    | Farm                   | Sample (206)                  |                    |                          |                           | •                          | Phenotypic                         |
| Dutil (2010) <sup>46</sup>                     | Canada          | Longitudinal    |              |         |                 | •                   | Hospital/private clinical laboratories (Not specified)                                 | Hospitals, clinics     | Isolate (1,424)               | •                  |                          |                           |                            | Phenotypic                         |
| Gallay (2007) <sup>50</sup>                    | France          | Longitudinal    | •            |         |                 |                     | Hospital/private clinical laboratories (Blood, faeces, other)                          | Hospitals, clinics     | Isolate (5,685)               |                    |                          | •                         |                            | Phenotypic                         |
| Harper (2009) <sup>62</sup>                    | USA             | Cross-sectional |              | •       |                 |                     | Humans working on pig farms (Nasal and pharyngeal swabs)                               | Farm                   | Sample (71)                   |                    |                          |                           | •                          | Phenotypic                         |
| Huijbers (2015) <sup>70</sup>                  | The Netherlands | Longitudinal    |              | •       |                 |                     | Farmers, employees, family members, farm residence (Environment, faeces & nasal swabs) | Farm                   | Sample humans (27) homes (75) |                    |                          |                           | •                          | Both                               |

Table 2 (continued)

| First author (year)                   | Country                    | Study design    | Intervention |         |                 |                     | Population sampled (Sample type)                                                                                                          | Sample point                                         | Unit of analysis (n) | Bacteria studied   |                          |                           |                            | Genotypic or phenotypic resistance |            |
|---------------------------------------|----------------------------|-----------------|--------------|---------|-----------------|---------------------|-------------------------------------------------------------------------------------------------------------------------------------------|------------------------------------------------------|----------------------|--------------------|--------------------------|---------------------------|----------------------------|------------------------------------|------------|
|                                       |                            |                 | External ban | Organic | Antibiotic free | Voluntary reduction |                                                                                                                                           |                                                      |                      | Enterobacteriaceae | <i>Enterococcus</i> spp. | <i>Campylobacter</i> spp. | <i>Staphylococcus</i> spp. |                                    |            |
| Johnson (2007) <sup>72</sup>          | USA                        | Longitudinal    |              |         | •               |                     | Adult hospital patients, healthy self-identified vegetarians (Faeces)                                                                     | Hospital patients, healthy adult vegetarians         | Isolate (530)        |                    |                          |                           |                            | Phenotypic                         |            |
| Kieke (2006) <sup>80</sup>            | USA                        | Cross-sectional |              |         | •               |                     | Hospital patients, vegetarians (Faeces, rectal swabs)                                                                                     | Hospital                                             | Isolate (170)        |                    |                          |                           | •                          | Both                               |            |
| Klare (1999) <sup>180</sup>           | Germany                    | Longitudinal    | •            |         |                 |                     | Healthy, non-hospitalized humans (Faeces)                                                                                                 | Healthy adults                                       | Sample (600)         |                    |                          |                           | •                          | Both                               |            |
| Kruse (1999) <sup>83</sup>            | Norway                     | Longitudinal    | •            |         |                 |                     | Poultry farmers (Faeces)                                                                                                                  | Farm                                                 | Isolate (26)         |                    |                          |                           | •                          | Both                               |            |
| Kühn (2005) <sup>84</sup>             | Sweden, Spain, Denmark, UK | Cross-sectional | •            |         |                 |                     | Healthy and hospitalized individuals, patients with enterococcal infections (Clinical samples, faeces, raw, treated, and hospital sewage) | Hospital, clinics, healthy adults, sewage facilities | Sample (522)         |                    |                          |                           | •                          | Both                               |            |
| Osadebe (2012) <sup>123</sup>         | USA                        | Cross-sectional |              |         |                 | •                   | Humans present on the farm on the day of animal sampling (Nasal and oropharyngeal swabs)                                                  | Farm                                                 | Sample (9)           |                    |                          |                           |                            | •                                  | Phenotypic |
| Rinsky (2013) <sup>181</sup>          | USA                        | Cross-sectional |              |         | •               |                     | Humans working at pig or poultry operations, household members (Nasal swabs)                                                              | Farm                                                 | Sample (204)         |                    |                          |                           |                            | •                                  | Both       |
| Skjot-Rasmussen (2009) <sup>151</sup> | Denmark                    | Longitudinal    | •            |         |                 |                     | Domestically acquired human cases, travel associated human cases (DANMAP)                                                                 | Hospitals, clinics                                   | Isolate (1,023)      |                    |                          |                           |                            | •                                  | Phenotypic |
| Smith (2013) <sup>153</sup>           | USA                        | Longitudinal    |              |         | •               |                     | Farm workers (Nasal swabs)                                                                                                                | Farm                                                 | Sample (145)         |                    |                          |                           |                            | •                                  | Phenotypic |
| Sørum (2006) <sup>156</sup>           | Norway                     | Longitudinal    | •            |         |                 |                     | Poultry producers (Faeces)                                                                                                                | Farm                                                 | Sample (115)         |                    |                          |                           | •                          | Both                               |            |

Table 2 (continued)

| First author<br>(year)                | Country         | Study design    | Intervention |         |                 |                     | Population sampled<br>(Sample type) | Sample point                       | Unit of<br>analysis<br>(n) | Bacteria studied   |                          |                           |                            | Genotypic<br>or<br>phenotypic<br>resistance |
|---------------------------------------|-----------------|-----------------|--------------|---------|-----------------|---------------------|-------------------------------------|------------------------------------|----------------------------|--------------------|--------------------------|---------------------------|----------------------------|---------------------------------------------|
|                                       |                 |                 | External ban | Organic | Antibiotic free | Voluntary reduction |                                     |                                    |                            | Enterobacteriaceae | <i>Enterococcus</i> spp. | <i>Campylobacter</i> spp. | <i>Staphylococcus</i> spp. |                                             |
| van den Bogaard (2000) <sup>168</sup> | The Netherlands | Longitudinal    | •            |         |                 |                     | (Sub)urban residents (Faeces)       | Healthy adults in (sub)urban areas | Sample (288)               |                    | •                        |                           |                            | Phenotypic                                  |
| van den Bogaard (2001) <sup>169</sup> | The Netherlands | Cross-sectional |              |         |                 | •                   | Poultry farmers (Faeces)            | Farm                               | Isolate (123)              |                    | •                        |                           |                            | Phenotypic                                  |

Abbreviations: NR - not reported; UK - United Kingdom; USA - United States

**Table 3: Assessment of study quality for individual animal studies**

| <b>First author (Year)</b> | <b>Is hypothesis/aim/objective of the study clearly defined?</b> | <b>Are the characteristics of the animals/humans included in the study clearly described?</b> | <b>Are the interventions of interest clearly described?</b> | <b>Are the main outcomes clearly described in the Introduction or Methods section?</b> | <b>Does the study provide estimates of the random variability in the data for main outcomes? (i.e. SD, 95% CI, etc.)</b> | <b>Were the subjects included in the study representative of the entire population from which they were recruited?</b> | <b>Were animals/humans included in the intervention and control groups recruited from the same source population? (i.e. Were they sampled from the same population?)</b> | <b>Were animals/humans included in the intervention and control groups recruited over the same period of time?</b> | <b>Was there adequate adjustment for important confounders in the analysis?</b> |
|----------------------------|------------------------------------------------------------------|-----------------------------------------------------------------------------------------------|-------------------------------------------------------------|----------------------------------------------------------------------------------------|--------------------------------------------------------------------------------------------------------------------------|------------------------------------------------------------------------------------------------------------------------|--------------------------------------------------------------------------------------------------------------------------------------------------------------------------|--------------------------------------------------------------------------------------------------------------------|---------------------------------------------------------------------------------|
| Aarestrup (1995)           | Yes                                                              | No                                                                                            | Yes                                                         | Yes                                                                                    | No                                                                                                                       | Unknown                                                                                                                | No                                                                                                                                                                       | No                                                                                                                 | No                                                                              |
| Aarestrup (2000a)          | Yes                                                              | No                                                                                            | Yes                                                         | Yes                                                                                    | Yes                                                                                                                      | Yes                                                                                                                    | Yes                                                                                                                                                                      | N/A                                                                                                                | No                                                                              |
| Aarestrup (2000b)          | Yes                                                              | No                                                                                            | Yes                                                         | Yes                                                                                    | No                                                                                                                       | Unknown                                                                                                                | No                                                                                                                                                                       | Yes                                                                                                                | No                                                                              |
| Aarestrup (2001)           | Yes                                                              | No                                                                                            | Yes                                                         | Yes                                                                                    | Yes                                                                                                                      | Yes                                                                                                                    | Yes                                                                                                                                                                      | Yes                                                                                                                | No                                                                              |
| Aarestrup (2002)           | Yes                                                              | No                                                                                            | No                                                          | Yes                                                                                    | No                                                                                                                       | No                                                                                                                     | Unknown                                                                                                                                                                  | No                                                                                                                 | No                                                                              |
| Abdalrahman (2015)         | Yes                                                              | Yes                                                                                           | No                                                          | Yes                                                                                    | No                                                                                                                       | No                                                                                                                     | Yes                                                                                                                                                                      | Yes                                                                                                                | No                                                                              |
| Agersø (2013)              | Yes                                                              | No                                                                                            | Yes                                                         | Yes                                                                                    | Yes                                                                                                                      | No                                                                                                                     | Yes                                                                                                                                                                      | Yes                                                                                                                | No                                                                              |
| Agga (2015)                | Yes                                                              | No                                                                                            | No                                                          | Yes                                                                                    | No                                                                                                                       | No                                                                                                                     | Unknown                                                                                                                                                                  | Unknown                                                                                                            | No                                                                              |
| Alali (2010)               | Yes                                                              | Yes                                                                                           | Yes                                                         | Yes                                                                                    | No                                                                                                                       | No                                                                                                                     | Yes                                                                                                                                                                      | Yes                                                                                                                | Yes                                                                             |
| Álvarez-Fernández (2012)   | Yes                                                              | Yes                                                                                           | Yes                                                         | Yes                                                                                    | Yes                                                                                                                      | No                                                                                                                     | Yes                                                                                                                                                                      | Yes                                                                                                                | No                                                                              |
| Álvarez-Fernández (2013)   | Yes                                                              | Yes                                                                                           | Yes                                                         | Yes                                                                                    | Yes                                                                                                                      | No                                                                                                                     | Yes                                                                                                                                                                      | Yes                                                                                                                | No                                                                              |
| Avrain (2003)              | Yes                                                              | No                                                                                            | Yes                                                         | Yes                                                                                    | No                                                                                                                       | Yes                                                                                                                    | Unknown                                                                                                                                                                  | Yes                                                                                                                | Unknown                                                                         |
| Bager (1999)               | Yes                                                              | No                                                                                            | Yes                                                         | Yes                                                                                    | No                                                                                                                       | Yes                                                                                                                    | Yes                                                                                                                                                                      | Yes                                                                                                                | No                                                                              |
| Barlow (2008)              | Yes                                                              | No                                                                                            | No                                                          | Yes                                                                                    | No                                                                                                                       | No                                                                                                                     | No                                                                                                                                                                       | Yes                                                                                                                | No                                                                              |
| Barlow (2009)              | Yes                                                              | No                                                                                            | No                                                          | Yes                                                                                    | No                                                                                                                       | Yes                                                                                                                    | No                                                                                                                                                                       | Yes                                                                                                                | No                                                                              |
| Bauer Garland (2006)       | Yes                                                              | Yes                                                                                           | Yes                                                         | Yes                                                                                    | No                                                                                                                       | No                                                                                                                     | Yes                                                                                                                                                                      | Yes                                                                                                                | Yes                                                                             |
| Bengtsson (2006)           | Yes                                                              | No                                                                                            | Yes                                                         | Yes                                                                                    | No                                                                                                                       | Yes                                                                                                                    | No                                                                                                                                                                       | Yes                                                                                                                | No                                                                              |
| Bennedsgaard (2006)        | Yes                                                              | Yes                                                                                           | Yes                                                         | Yes                                                                                    | Yes                                                                                                                      | No                                                                                                                     | Yes                                                                                                                                                                      | Yes                                                                                                                | Yes                                                                             |
| Boerlin (2001)             | Yes                                                              | No                                                                                            | Yes                                                         | Yes                                                                                    | Yes                                                                                                                      | Unknown                                                                                                                | Yes                                                                                                                                                                      | Yes                                                                                                                | No                                                                              |
| Bombyk (2007)              | Yes                                                              | No                                                                                            | No                                                          | Yes                                                                                    | No                                                                                                                       | No                                                                                                                     | No                                                                                                                                                                       | Unknown                                                                                                            | No                                                                              |

Table 3 (continued)

| <b>First author (Year)</b>       | <b>Is hypothesis/aim/objective of the study clearly defined?</b> | <b>Are the characteristics of the animals/humans included in the study clearly described?</b> | <b>Are the interventions of interest clearly described?</b> | <b>Are the main outcomes clearly described in the Introduction or Methods section?</b> | <b>Does the study provide estimates of the random variability in the data for main outcomes? (i.e. SD, 95% CI, etc.)</b> | <b>Were the subjects included in the study representative of the entire population from which they were recruited?</b> | <b>Were animals/humans included in the intervention and control groups recruited from the same source population? (i.e. Were they sampled from the same population?)</b> | <b>Were animals/humans included in the intervention and control groups recruited over the same period of time?</b> | <b>Was there adequate adjustment for important confounders in the analysis?</b> |
|----------------------------------|------------------------------------------------------------------|-----------------------------------------------------------------------------------------------|-------------------------------------------------------------|----------------------------------------------------------------------------------------|--------------------------------------------------------------------------------------------------------------------------|------------------------------------------------------------------------------------------------------------------------|--------------------------------------------------------------------------------------------------------------------------------------------------------------------------|--------------------------------------------------------------------------------------------------------------------|---------------------------------------------------------------------------------|
| Bombyk (2008)                    | Yes                                                              | No                                                                                            | Yes                                                         | Yes                                                                                    | No                                                                                                                       | No                                                                                                                     | Yes                                                                                                                                                                      | Yes                                                                                                                | Yes                                                                             |
| Borgen (2000)                    | Yes                                                              | No                                                                                            | Yes                                                         | Yes                                                                                    | Yes                                                                                                                      | No                                                                                                                     | No                                                                                                                                                                       | N/A                                                                                                                | No                                                                              |
| Borgen (2001)                    | Yes                                                              | No                                                                                            | Yes                                                         | Yes                                                                                    | No                                                                                                                       | Yes                                                                                                                    | No                                                                                                                                                                       | Yes                                                                                                                | No                                                                              |
| Boutet (2005)                    | Yes                                                              | No                                                                                            | Yes                                                         | Yes                                                                                    | No                                                                                                                       | No                                                                                                                     | Yes                                                                                                                                                                      | Yes                                                                                                                | Unknown                                                                         |
| Boyer (2012)                     | Yes                                                              | Yes                                                                                           | Yes                                                         | Yes                                                                                    | Yes                                                                                                                      | No                                                                                                                     | No                                                                                                                                                                       | Yes                                                                                                                | Yes                                                                             |
| Bunner (2007)                    | Yes                                                              | Unknown                                                                                       | No                                                          | Yes                                                                                    | Yes                                                                                                                      | Unknown                                                                                                                | Yes                                                                                                                                                                      | Yes                                                                                                                | Yes                                                                             |
| Buntenkoetter (2014)             | Yes                                                              | No                                                                                            | Yes                                                         | Yes                                                                                    | Yes                                                                                                                      | No                                                                                                                     | No                                                                                                                                                                       | Yes                                                                                                                | No                                                                              |
| Butaye (1999)                    | No                                                               | No                                                                                            | No                                                          | Yes                                                                                    | No                                                                                                                       | No                                                                                                                     | No                                                                                                                                                                       | No                                                                                                                 | No                                                                              |
| Cho (2006)                       | Yes                                                              | Yes                                                                                           | No                                                          | Yes                                                                                    | No                                                                                                                       | No                                                                                                                     | Yes                                                                                                                                                                      | Yes                                                                                                                | No                                                                              |
| Cho (2007)                       | Yes                                                              | No                                                                                            | Yes                                                         | Yes                                                                                    | No                                                                                                                       | No                                                                                                                     | No                                                                                                                                                                       | Yes                                                                                                                | No                                                                              |
| Cicconi-Hogan (2014)             | Yes                                                              | No                                                                                            | No                                                          | Yes                                                                                    | Yes                                                                                                                      | No                                                                                                                     | Yes                                                                                                                                                                      | Yes                                                                                                                | No                                                                              |
| CIPARS (2016)                    | Yes                                                              | No                                                                                            | Yes                                                         | Yes                                                                                    | No                                                                                                                       | Yes                                                                                                                    | Unknown                                                                                                                                                                  | N/A                                                                                                                | No                                                                              |
| Coalition for Animal Health (NR) | Yes                                                              | No                                                                                            | Yes                                                         | Yes                                                                                    | No                                                                                                                       | Unknown                                                                                                                | Unknown                                                                                                                                                                  | N/A                                                                                                                | No                                                                              |
| Cohen Stuart (2012)              | Yes                                                              | Yes                                                                                           | Yes                                                         | Yes                                                                                    | Yes                                                                                                                      | Yes                                                                                                                    | No                                                                                                                                                                       | Yes                                                                                                                | No                                                                              |
| Cui (2004)                       | Yes                                                              | Yes                                                                                           | Yes                                                         | Yes                                                                                    | No                                                                                                                       | No                                                                                                                     | No                                                                                                                                                                       | Yes                                                                                                                | No                                                                              |
| Cui (2005)                       | Yes                                                              | Yes                                                                                           | Yes                                                         | Yes                                                                                    | No                                                                                                                       | No                                                                                                                     | No                                                                                                                                                                       | Yes                                                                                                                | No                                                                              |
| Cuny (2012)                      | No                                                               | Unknown                                                                                       | Unknown                                                     | Unknown                                                                                | No                                                                                                                       | No                                                                                                                     | Yes                                                                                                                                                                      | Unknown                                                                                                            | No                                                                              |
| Del Grosso (2000)                | Yes                                                              | No                                                                                            | Yes                                                         | Yes                                                                                    | No                                                                                                                       | Unknown                                                                                                                | Yes                                                                                                                                                                      | Yes                                                                                                                | No                                                                              |
| Desmonts (2004)                  | Yes                                                              | No                                                                                            | Yes                                                         | Yes                                                                                    | No                                                                                                                       | No                                                                                                                     | Yes                                                                                                                                                                      | Yes                                                                                                                | No                                                                              |
| Docic (2003)                     | Yes                                                              | No                                                                                            | Yes                                                         | Yes                                                                                    | No                                                                                                                       | Yes                                                                                                                    | No                                                                                                                                                                       | No                                                                                                                 | No                                                                              |
| Dolejska (2011)                  | Yes                                                              | Yes                                                                                           | No                                                          | Yes                                                                                    | No                                                                                                                       | No                                                                                                                     | Yes                                                                                                                                                                      | Yes                                                                                                                | No                                                                              |

Table 3 (continued)

| <b>First author (Year)</b> | <b>Is hypothesis/aim/objective of the study clearly defined?</b> | <b>Are the characteristics of the animals/humans included in the study clearly described?</b> | <b>Are the interventions of interest clearly described?</b> | <b>Are the main outcomes clearly described in the Introduction or Methods section?</b> | <b>Does the study provide estimates of the random variability in the data for main outcomes? (i.e. SD, 95% CI, etc.)</b> | <b>Were the subjects included in the study representative of the entire population from which they were recruited?</b> | <b>Were animals/humans included in the intervention and control groups recruited from the same source population? (i.e. Were they sampled from the same population?)</b> | <b>Were animals/humans included in the intervention and control groups recruited over the same period of time?</b> | <b>Was there adequate adjustment for important confounders in the analysis?</b> |
|----------------------------|------------------------------------------------------------------|-----------------------------------------------------------------------------------------------|-------------------------------------------------------------|----------------------------------------------------------------------------------------|--------------------------------------------------------------------------------------------------------------------------|------------------------------------------------------------------------------------------------------------------------|--------------------------------------------------------------------------------------------------------------------------------------------------------------------------|--------------------------------------------------------------------------------------------------------------------|---------------------------------------------------------------------------------|
| Dorado-García (2013)       | Yes                                                              | No                                                                                            | Yes                                                         | Yes                                                                                    | No                                                                                                                       | Yes                                                                                                                    | Yes                                                                                                                                                                      | N/A                                                                                                                | No                                                                              |
| Dorado-García (2015a)      | Yes                                                              | Yes                                                                                           | Yes                                                         | Yes                                                                                    | Yes                                                                                                                      | Unknown                                                                                                                | Yes                                                                                                                                                                      | N/A                                                                                                                | Yes                                                                             |
| Dorado-García (2015b)      | Yes                                                              | Yes                                                                                           | Yes                                                         | Yes                                                                                    | Yes                                                                                                                      | No                                                                                                                     | Yes                                                                                                                                                                      | Yes                                                                                                                | Yes                                                                             |
| Dorado-García (2016)       | Yes                                                              | No                                                                                            | No                                                          | Yes                                                                                    | Yes                                                                                                                      | Yes                                                                                                                    | Yes                                                                                                                                                                      | Yes                                                                                                                | Yes                                                                             |
| Dutil (2010)               | Yes                                                              | Yes                                                                                           | Yes                                                         | Yes                                                                                    | No                                                                                                                       | Yes                                                                                                                    | Yes                                                                                                                                                                      | Yes                                                                                                                | No                                                                              |
| El-Shibiny (2005)          | Yes                                                              | Yes                                                                                           | Yes                                                         | Yes                                                                                    | No                                                                                                                       | No                                                                                                                     | Yes                                                                                                                                                                      | Yes                                                                                                                | Unknown                                                                         |
| Emborg (2002)              | Yes                                                              | No                                                                                            | Yes                                                         | Yes                                                                                    | Yes                                                                                                                      | Yes                                                                                                                    | Yes                                                                                                                                                                      | N/A                                                                                                                | Unknown                                                                         |
| Fraqueza (2014)            | Yes                                                              | No                                                                                            | Yes                                                         | Yes                                                                                    | Yes                                                                                                                      | Unknown                                                                                                                | No                                                                                                                                                                       | Yes                                                                                                                | No                                                                              |
| Gallay (2007)              | Yes                                                              | No                                                                                            | No                                                          | Yes                                                                                    | No                                                                                                                       | Yes                                                                                                                    | Yes                                                                                                                                                                      | Yes                                                                                                                | No                                                                              |
| García Migura (2005)       | Yes                                                              | No                                                                                            | No                                                          | Yes                                                                                    | No                                                                                                                       | Unknown                                                                                                                | Yes                                                                                                                                                                      | Yes                                                                                                                | No                                                                              |
| Garmo (2010)               | Yes                                                              | Yes                                                                                           | Yes                                                         | Yes                                                                                    | No                                                                                                                       | Yes                                                                                                                    | No                                                                                                                                                                       | Yes                                                                                                                | Yes                                                                             |
| Ge (2004)                  | Yes                                                              | No                                                                                            | No                                                          | Yes                                                                                    | No                                                                                                                       | No                                                                                                                     | No                                                                                                                                                                       | Yes                                                                                                                | Unknown                                                                         |
| Gebreyes (2006)            | Yes                                                              | No                                                                                            | Yes                                                         | Yes                                                                                    | Yes                                                                                                                      | No                                                                                                                     | Unknown                                                                                                                                                                  | Yes                                                                                                                | No                                                                              |
| Gellin (1989)              | Yes                                                              | No                                                                                            | Yes                                                         | Yes                                                                                    | No                                                                                                                       | No                                                                                                                     | Unknown                                                                                                                                                                  | Unknown                                                                                                            | No                                                                              |
| Gerzova (2015)             | Yes                                                              | No                                                                                            | No                                                          | Yes                                                                                    | Yes                                                                                                                      | Yes                                                                                                                    | Unknown                                                                                                                                                                  | Yes                                                                                                                | No                                                                              |
| Guarddon (2014)            | Yes                                                              | Yes                                                                                           | Yes                                                         | Yes                                                                                    | No                                                                                                                       | Unknown                                                                                                                | Yes                                                                                                                                                                      | Yes                                                                                                                | No                                                                              |
| Halbert (2006a)            | Yes                                                              | No                                                                                            | No                                                          | Yes                                                                                    | No                                                                                                                       | Unknown                                                                                                                | No                                                                                                                                                                       | Unknown                                                                                                            | No                                                                              |
| Halbert (2006b)            | Yes                                                              | No                                                                                            | Yes                                                         | Yes                                                                                    | No                                                                                                                       | Yes                                                                                                                    | Yes                                                                                                                                                                      | Yes                                                                                                                | No                                                                              |
| Hammerum (2007)            | Yes                                                              | No                                                                                            | Yes                                                         | Yes                                                                                    | No                                                                                                                       | Yes                                                                                                                    | Yes                                                                                                                                                                      | Yes                                                                                                                | Unknown                                                                         |
| Han (2009)                 | Yes                                                              | Yes                                                                                           | Yes                                                         | Yes                                                                                    | No                                                                                                                       | No                                                                                                                     | Yes                                                                                                                                                                      | No                                                                                                                 | No                                                                              |
| Harper (2009)              | Yes                                                              | No                                                                                            | No                                                          | No                                                                                     | No                                                                                                                       | No                                                                                                                     | Unknown                                                                                                                                                                  | Unknown                                                                                                            | Unknown                                                                         |

Table 3 (continued)

| <b>First author (Year)</b> | <b>Is hypothesis/aim/objective of the study clearly defined?</b> | <b>Are the characteristics of the animals/humans included in the study clearly described?</b> | <b>Are the interventions of interest clearly described?</b> | <b>Are the main outcomes clearly described in the Introduction or Methods section?</b> | <b>Does the study provide estimates of the random variability in the data for main outcomes? (i.e. SD, 95% CI, etc.)</b> | <b>Were the subjects included in the study representative of the entire population from which they were recruited?</b> | <b>Were animals/humans included in the intervention and control groups recruited from the same source population? (i.e. Were they sampled from the same population?)</b> | <b>Were animals/humans included in the intervention and control groups recruited over the same period of time?</b> | <b>Was there adequate adjustment for important confounders in the analysis?</b> |
|----------------------------|------------------------------------------------------------------|-----------------------------------------------------------------------------------------------|-------------------------------------------------------------|----------------------------------------------------------------------------------------|--------------------------------------------------------------------------------------------------------------------------|------------------------------------------------------------------------------------------------------------------------|--------------------------------------------------------------------------------------------------------------------------------------------------------------------------|--------------------------------------------------------------------------------------------------------------------|---------------------------------------------------------------------------------|
| Harvey (2009)              | Yes                                                              | Yes                                                                                           | Yes                                                         | Yes                                                                                    | No                                                                                                                       | No                                                                                                                     | Yes                                                                                                                                                                      | Unknown                                                                                                            | No                                                                              |
| Hässig (2014)              | Yes                                                              | Yes                                                                                           | Yes                                                         | Yes                                                                                    | No                                                                                                                       | No                                                                                                                     | Yes                                                                                                                                                                      | Yes                                                                                                                | No                                                                              |
| Heuer (2001)               | Yes                                                              | Yes                                                                                           | Yes                                                         | Yes                                                                                    | Yes                                                                                                                      | No                                                                                                                     | No                                                                                                                                                                       | Yes                                                                                                                | No                                                                              |
| Heuer (2002)               | Yes                                                              | Yes                                                                                           | Yes                                                         | Yes                                                                                    | No                                                                                                                       | Unknown                                                                                                                | No                                                                                                                                                                       | Yes                                                                                                                | No                                                                              |
| Hiki (2015)                | Yes                                                              | No                                                                                            | Yes                                                         | Yes                                                                                    | No                                                                                                                       | Yes                                                                                                                    | Yes                                                                                                                                                                      | N/A                                                                                                                | No                                                                              |
| Hiroi (2012)               | No                                                               | Yes                                                                                           | Yes                                                         | Yes                                                                                    | No                                                                                                                       | No                                                                                                                     | Yes                                                                                                                                                                      | Yes                                                                                                                | Yes                                                                             |
| Hoogenboom (2008)          | Yes                                                              | No                                                                                            | No                                                          | Yes                                                                                    | No                                                                                                                       | Unknown                                                                                                                | Unknown                                                                                                                                                                  | No                                                                                                                 | Unknown                                                                         |
| Huijbers (2015)            | Yes                                                              | Yes                                                                                           | No                                                          | Yes                                                                                    | No                                                                                                                       | Yes                                                                                                                    | No                                                                                                                                                                       | No                                                                                                                 | No                                                                              |
| Jensen (2014)              | No                                                               | No                                                                                            | Yes                                                         | No                                                                                     | No                                                                                                                       | No                                                                                                                     | No                                                                                                                                                                       | Yes                                                                                                                | Unknown                                                                         |
| Johnson (2007)             | Yes                                                              | Yes                                                                                           | No                                                          | Yes                                                                                    | No                                                                                                                       | Unknown                                                                                                                | Unknown                                                                                                                                                                  | Unknown                                                                                                            | Yes                                                                             |
| Johnston (2002)            | Yes                                                              | No                                                                                            | Yes                                                         | Yes                                                                                    | No                                                                                                                       | No                                                                                                                     | No                                                                                                                                                                       | Yes                                                                                                                | No                                                                              |
| Joseph (2007)              | Yes                                                              | No                                                                                            | Yes                                                         | Yes                                                                                    | No                                                                                                                       | No                                                                                                                     | No                                                                                                                                                                       | Unknown                                                                                                            | No                                                                              |
| Joseph (2008)              | Yes                                                              | No                                                                                            | No                                                          | Yes                                                                                    | No                                                                                                                       | Unknown                                                                                                                | Unknown                                                                                                                                                                  | Unknown                                                                                                            | Unknown                                                                         |
| Kassem (2017)              | Yes                                                              | Yes                                                                                           | Yes                                                         | Yes                                                                                    | Yes                                                                                                                      | No                                                                                                                     | No                                                                                                                                                                       | Yes                                                                                                                | No                                                                              |
| Keelara (2013)             | Yes                                                              | No                                                                                            | Yes                                                         | Yes                                                                                    | No                                                                                                                       | Unknown                                                                                                                | No                                                                                                                                                                       | Yes                                                                                                                | Yes                                                                             |
| Kerouanton (2014)          | Yes                                                              | No                                                                                            | No                                                          | No                                                                                     | No                                                                                                                       | No                                                                                                                     | Unknown                                                                                                                                                                  | Yes                                                                                                                | No                                                                              |
| Khachatryan (2006)         | Yes                                                              | No                                                                                            | Yes                                                         | Yes                                                                                    | Yes                                                                                                                      | No                                                                                                                     | Yes                                                                                                                                                                      | Yes                                                                                                                | No                                                                              |
| Kieke (2006)               | Yes                                                              | Yes                                                                                           | Yes                                                         | Yes                                                                                    | Yes                                                                                                                      | No                                                                                                                     | No                                                                                                                                                                       | No                                                                                                                 | Yes                                                                             |
| Kilonzo-Nthenge (2015)     | Yes                                                              | Yes                                                                                           | No                                                          | Yes                                                                                    | Yes                                                                                                                      | No                                                                                                                     | No                                                                                                                                                                       | No                                                                                                                 | No                                                                              |
| Kola (2012)                | Yes                                                              | No                                                                                            | No                                                          | Yes                                                                                    | Yes                                                                                                                      | No                                                                                                                     | No                                                                                                                                                                       | Yes                                                                                                                | Yes                                                                             |
| Kruse (1999)               | No                                                               | No                                                                                            | Yes                                                         | Yes                                                                                    | No                                                                                                                       | Unknown                                                                                                                | Unknown                                                                                                                                                                  | No                                                                                                                 | No                                                                              |



Table 3 (continued)

| <b>First author (Year)</b> | <b>Is hypothesis/aim/objective of the study clearly defined?</b> | <b>Are the characteristics of the animals/humans included in the study clearly described?</b> | <b>Are the interventions of interest clearly described?</b> | <b>Are the main outcomes clearly described in the Introduction or Methods section?</b> | <b>Does the study provide estimates of the random variability in the data for main outcomes? (i.e. SD, 95% CI, etc.)</b> | <b>Were the subjects included in the study representative of the entire population from which they were recruited?</b> | <b>Were animals/humans included in the intervention and control groups recruited from the same source population? (i.e. Were they sampled from the same population?)</b> | <b>Were animals/humans included in the intervention and control groups recruited over the same period of time?</b> | <b>Was there adequate adjustment for important confounders in the analysis?</b> |
|----------------------------|------------------------------------------------------------------|-----------------------------------------------------------------------------------------------|-------------------------------------------------------------|----------------------------------------------------------------------------------------|--------------------------------------------------------------------------------------------------------------------------|------------------------------------------------------------------------------------------------------------------------|--------------------------------------------------------------------------------------------------------------------------------------------------------------------------|--------------------------------------------------------------------------------------------------------------------|---------------------------------------------------------------------------------|
| Kühn (2005)                | Yes                                                              | No                                                                                            | Yes                                                         | Yes                                                                                    | No                                                                                                                       | Unknown                                                                                                                | No                                                                                                                                                                       | Yes                                                                                                                | Unknown                                                                         |
| Lam (2012)                 | Yes                                                              | No                                                                                            | Yes                                                         | No                                                                                     | No                                                                                                                       | Yes                                                                                                                    | Unknown                                                                                                                                                                  | N/A                                                                                                                | Unknown                                                                         |
| Langlois (1983)            | Yes                                                              | No                                                                                            | Yes                                                         | No                                                                                     | No                                                                                                                       | No                                                                                                                     | Yes                                                                                                                                                                      | N/A                                                                                                                | Unknown                                                                         |
| Langlois (1986)            | Yes                                                              | No                                                                                            | Yes                                                         | Yes                                                                                    | No                                                                                                                       | No                                                                                                                     | No                                                                                                                                                                       | Yes                                                                                                                | No                                                                              |
| Larsen (1975)              | Unknown                                                          | Unknown                                                                                       | Unknown                                                     | Unknown                                                                                | Unknown                                                                                                                  | Unknown                                                                                                                | Unknown                                                                                                                                                                  | Unknown                                                                                                            | Unknown                                                                         |
| Lauderdale (2007)          | Yes                                                              | No                                                                                            | Yes                                                         | Yes                                                                                    | No                                                                                                                       | Yes                                                                                                                    | Yes                                                                                                                                                                      | N/A                                                                                                                | No                                                                              |
| Lebek (1979)               | Unknown                                                          | No                                                                                            | Yes                                                         | Yes                                                                                    | No                                                                                                                       | No                                                                                                                     | Yes                                                                                                                                                                      | N/A                                                                                                                | No                                                                              |
| Lee (2013)                 | Yes                                                              | No                                                                                            | No                                                          | Yes                                                                                    | No                                                                                                                       | No                                                                                                                     | Unknown                                                                                                                                                                  | Yes                                                                                                                | No                                                                              |
| LeJeune (2004)             | Yes                                                              | No                                                                                            | No                                                          | Yes                                                                                    | No                                                                                                                       | Unknown                                                                                                                | Unknown                                                                                                                                                                  | Yes                                                                                                                | No                                                                              |
| Lenart-Boron (2016)        | Yes                                                              | No                                                                                            | Yes                                                         | Yes                                                                                    | No                                                                                                                       | No                                                                                                                     | No                                                                                                                                                                       | Yes                                                                                                                | No                                                                              |
| Lestari (2009)             | Yes                                                              | Yes                                                                                           | Yes                                                         | Yes                                                                                    | No                                                                                                                       | No                                                                                                                     | No                                                                                                                                                                       | Yes                                                                                                                | No                                                                              |
| Looft (2012)               | Yes                                                              | Yes                                                                                           | Yes                                                         | No                                                                                     | No                                                                                                                       | No                                                                                                                     | Yes                                                                                                                                                                      | Yes                                                                                                                | No                                                                              |
| Lou (1995)                 | Yes                                                              | Yes                                                                                           | Yes                                                         | Yes                                                                                    | No                                                                                                                       | No                                                                                                                     | Yes                                                                                                                                                                      | N/A                                                                                                                | No                                                                              |
| Luangtongkum (2006)        | Yes                                                              | No                                                                                            | Yes                                                         | Yes                                                                                    | No                                                                                                                       | Unknown                                                                                                                | No                                                                                                                                                                       | Yes                                                                                                                | No                                                                              |
| Mathew (2001)              | Yes                                                              | No                                                                                            | Yes                                                         | Yes                                                                                    | No                                                                                                                       | Yes                                                                                                                    | Unknown                                                                                                                                                                  | Unknown                                                                                                            | No                                                                              |
| Mazengia (2014)            | Yes                                                              | No                                                                                            | No                                                          | Yes                                                                                    | No                                                                                                                       | No                                                                                                                     | Yes                                                                                                                                                                      | Yes                                                                                                                | No                                                                              |
| Meemken (2009)             | Yes                                                              | No                                                                                            | No                                                          | No                                                                                     | No                                                                                                                       | Unknown                                                                                                                | Unknown                                                                                                                                                                  | Unknown                                                                                                            | No                                                                              |
| Mehboob (2003)             | Yes                                                              | No                                                                                            | Yes                                                         | Yes                                                                                    | No                                                                                                                       | Unknown                                                                                                                | Unknown                                                                                                                                                                  | Unknown                                                                                                            | Unknown                                                                         |
| Millar (2007)              | No                                                               | No                                                                                            | No                                                          | No                                                                                     | No                                                                                                                       | No                                                                                                                     | No                                                                                                                                                                       | Yes                                                                                                                | No                                                                              |
| Millman (2013)             | Yes                                                              | Yes                                                                                           | No                                                          | Yes                                                                                    | No                                                                                                                       | No                                                                                                                     | Yes                                                                                                                                                                      | Yes                                                                                                                | No                                                                              |
| Miranda (2007)             | Yes                                                              | Yes                                                                                           | No                                                          | Yes                                                                                    | No                                                                                                                       | No                                                                                                                     | Yes                                                                                                                                                                      | Yes                                                                                                                | No                                                                              |

Table 3 (continued)

| <b>First author (Year)</b> | <b>Is hypothesis/aim/objective of the study clearly defined?</b> | <b>Are the characteristics of the animals/humans included in the study clearly described?</b> | <b>Are the interventions of interest clearly described?</b> | <b>Are the main outcomes clearly described in the Introduction or Methods section?</b> | <b>Does the study provide estimates of the random variability in the data for main outcomes? (i.e. SD, 95% CI, etc.)</b> | <b>Were the subjects included in the study representative of the entire population from which they were recruited?</b> | <b>Were animals/humans included in the intervention and control groups recruited from the same source population? (i.e. Were they sampled from the same population?)</b> | <b>Were animals/humans included in the intervention and control groups recruited over the same period of time?</b> | <b>Was there adequate adjustment for important confounders in the analysis?</b> |
|----------------------------|------------------------------------------------------------------|-----------------------------------------------------------------------------------------------|-------------------------------------------------------------|----------------------------------------------------------------------------------------|--------------------------------------------------------------------------------------------------------------------------|------------------------------------------------------------------------------------------------------------------------|--------------------------------------------------------------------------------------------------------------------------------------------------------------------------|--------------------------------------------------------------------------------------------------------------------|---------------------------------------------------------------------------------|
| Miranda (2008a)            | Yes                                                              | Yes                                                                                           | No                                                          | Yes                                                                                    | No                                                                                                                       | No                                                                                                                     | Yes                                                                                                                                                                      | Yes                                                                                                                | No                                                                              |
| Miranda (2008b)            | Yes                                                              | Yes                                                                                           | No                                                          | Yes                                                                                    | No                                                                                                                       | No                                                                                                                     | Yes                                                                                                                                                                      | Yes                                                                                                                | No                                                                              |
| Miranda (2008c)            | Yes                                                              | Yes                                                                                           | No                                                          | Yes                                                                                    | No                                                                                                                       | No                                                                                                                     | Yes                                                                                                                                                                      | Yes                                                                                                                | No                                                                              |
| Miranda (2009a)            | Yes                                                              | No                                                                                            | Yes                                                         | Yes                                                                                    | No                                                                                                                       | Unknown                                                                                                                | Yes                                                                                                                                                                      | Yes                                                                                                                | No                                                                              |
| Miranda (2009b)            | Yes                                                              | Yes                                                                                           | No                                                          | Yes                                                                                    | No                                                                                                                       | No                                                                                                                     | Yes                                                                                                                                                                      | Yes                                                                                                                | No                                                                              |
| Miranda CD (2007)          | Yes                                                              | No                                                                                            | Yes                                                         | Yes                                                                                    | Yes                                                                                                                      | No                                                                                                                     | Unknown                                                                                                                                                                  | Yes                                                                                                                | No                                                                              |
| Mitchell (2004)            | Yes                                                              | No                                                                                            | No                                                          | Yes                                                                                    | Yes                                                                                                                      | Unknown                                                                                                                | Yes                                                                                                                                                                      | Yes                                                                                                                | Yes                                                                             |
| Mollenkopf (2014)          | Yes                                                              | Yes                                                                                           | No                                                          | Yes                                                                                    | No                                                                                                                       | No                                                                                                                     | Unknown                                                                                                                                                                  | Yes                                                                                                                | Yes                                                                             |
| Morley (2011)              | Yes                                                              | Yes                                                                                           | Yes                                                         | Yes                                                                                    | Yes                                                                                                                      | Yes                                                                                                                    | No                                                                                                                                                                       | Yes                                                                                                                | Yes                                                                             |
| Nannapaneni (2009)         | Yes                                                              | No                                                                                            | Yes                                                         | Yes                                                                                    | No                                                                                                                       | Unknown                                                                                                                | Yes                                                                                                                                                                      | N/A                                                                                                                | No                                                                              |
| Noormohamed (2014)         | Yes                                                              | No                                                                                            | No                                                          | No                                                                                     | No                                                                                                                       | Unknown                                                                                                                | Unknown                                                                                                                                                                  | Yes                                                                                                                | No                                                                              |
| Norby (2003)               | Yes                                                              | No                                                                                            | Yes                                                         | Yes                                                                                    | No                                                                                                                       | Yes                                                                                                                    | Yes                                                                                                                                                                      | Unknown                                                                                                            | Unknown                                                                         |
| Nugent (2001)              | Yes                                                              | No                                                                                            | Yes                                                         | Yes                                                                                    | No                                                                                                                       | Unknown                                                                                                                | Yes                                                                                                                                                                      | Yes                                                                                                                | Unknown                                                                         |
| Nulsen (2008)              | Yes                                                              | No                                                                                            | Yes                                                         | No                                                                                     | No                                                                                                                       | Unknown                                                                                                                | Unknown                                                                                                                                                                  | Yes                                                                                                                | No                                                                              |
| Nwankwo (2014)             | Yes                                                              | No                                                                                            | Yes                                                         | Yes                                                                                    | No                                                                                                                       | Unknown                                                                                                                | Unknown                                                                                                                                                                  | Unknown                                                                                                            | No                                                                              |
| Obeng (2012)               | Yes                                                              | No                                                                                            | Yes                                                         | Yes                                                                                    | No                                                                                                                       | No                                                                                                                     | Unknown                                                                                                                                                                  | Yes                                                                                                                | Unknown                                                                         |
| O'Brien (2012)             | Yes                                                              | Yes                                                                                           | No                                                          | Yes                                                                                    | Yes                                                                                                                      | Yes                                                                                                                    | Unknown                                                                                                                                                                  | Yes                                                                                                                | No                                                                              |
| O'Neill (2010)             | Yes                                                              | No                                                                                            | Yes                                                         | Yes                                                                                    | No                                                                                                                       | Unknown                                                                                                                | Unknown                                                                                                                                                                  | Unknown                                                                                                            | No                                                                              |
| Osadebe (2012)             | Yes                                                              | Yes                                                                                           | Yes                                                         | Yes                                                                                    | No                                                                                                                       | Unknown                                                                                                                | Yes                                                                                                                                                                      | Yes                                                                                                                | Yes                                                                             |
| Österberg (2016)           | Yes                                                              | No                                                                                            | Yes                                                         | Yes                                                                                    | Yes                                                                                                                      | No                                                                                                                     | No                                                                                                                                                                       | Yes                                                                                                                | Yes                                                                             |
| Pantosti (1999)            | Yes                                                              | No                                                                                            | Yes                                                         | No                                                                                     | No                                                                                                                       | No                                                                                                                     | Yes                                                                                                                                                                      | N/A                                                                                                                | No                                                                              |

Table 3 (continued)

| <b>First author (Year)</b> | <b>Is hypothesis/aim/objective of the study clearly defined?</b> | <b>Are the characteristics of the animals/humans included in the study clearly described?</b> | <b>Are the interventions of interest clearly described?</b> | <b>Are the main outcomes clearly described in the Introduction or Methods section?</b> | <b>Does the study provide estimates of the random variability in the data for main outcomes? (i.e. SD, 95% CI, etc.)</b> | <b>Were the subjects included in the study representative of the entire population from which they were recruited?</b> | <b>Were animals/humans included in the intervention and control groups recruited from the same source population? (i.e. Were they sampled from the same population?)</b> | <b>Were animals/humans included in the intervention and control groups recruited over the same period of time?</b> | <b>Was there adequate adjustment for important confounders in the analysis?</b> |
|----------------------------|------------------------------------------------------------------|-----------------------------------------------------------------------------------------------|-------------------------------------------------------------|----------------------------------------------------------------------------------------|--------------------------------------------------------------------------------------------------------------------------|------------------------------------------------------------------------------------------------------------------------|--------------------------------------------------------------------------------------------------------------------------------------------------------------------------|--------------------------------------------------------------------------------------------------------------------|---------------------------------------------------------------------------------|
| Park (2012)                | Yes                                                              | No                                                                                            | Yes                                                         | Yes                                                                                    | No                                                                                                                       | Unknown                                                                                                                | Yes                                                                                                                                                                      | N/A                                                                                                                | No                                                                              |
| Patchanee (2008)           | Yes                                                              | No                                                                                            | No                                                          | Yes                                                                                    | No                                                                                                                       | No                                                                                                                     | Unknown                                                                                                                                                                  | Unknown                                                                                                            | No                                                                              |
| Peng (2016)                | Yes                                                              | No                                                                                            | No                                                          | Yes                                                                                    | No                                                                                                                       | Unknown                                                                                                                | No                                                                                                                                                                       | Unknown                                                                                                            | No                                                                              |
| Petty (2008)               | No                                                               | No                                                                                            | Yes                                                         | No                                                                                     | No                                                                                                                       | No                                                                                                                     | Unknown                                                                                                                                                                  | Unknown                                                                                                            | No                                                                              |
| Pol (2007)                 | Yes                                                              | No                                                                                            | Yes                                                         | Yes                                                                                    | No                                                                                                                       | No                                                                                                                     | Unknown                                                                                                                                                                  | Unknown                                                                                                            | No                                                                              |
| Price (2005)               | Yes                                                              | No                                                                                            | No                                                          | Yes                                                                                    | Yes                                                                                                                      | No                                                                                                                     | Unknown                                                                                                                                                                  | Yes                                                                                                                | No                                                                              |
| Price (2007)               | Yes                                                              | No                                                                                            | No                                                          | Yes                                                                                    | Yes                                                                                                                      | No                                                                                                                     | Unknown                                                                                                                                                                  | Yes                                                                                                                | No                                                                              |
| Ray (2006)                 | Yes                                                              | No                                                                                            | Yes                                                         | Yes                                                                                    | Yes                                                                                                                      | Yes                                                                                                                    | Unknown                                                                                                                                                                  | Yes                                                                                                                | Yes                                                                             |
| Reinstein (2009)           | Yes                                                              | No                                                                                            | Yes                                                         | No                                                                                     | Yes                                                                                                                      | Unknown                                                                                                                | Unknown                                                                                                                                                                  | Unknown                                                                                                            | No                                                                              |
| Roesch (2006)              | Yes                                                              | Yes                                                                                           | Yes                                                         | Yes                                                                                    | No                                                                                                                       | Yes                                                                                                                    | Yes                                                                                                                                                                      | Yes                                                                                                                | No                                                                              |
| Rollo (2010)               | Yes                                                              | Yes                                                                                           | Yes                                                         | Yes                                                                                    | Yes                                                                                                                      | Unknown                                                                                                                | Yes                                                                                                                                                                      | Yes                                                                                                                | Yes                                                                             |
| Rossa (2013)               | Yes                                                              | Yes                                                                                           | Yes                                                         | Yes                                                                                    | No                                                                                                                       | No                                                                                                                     | No                                                                                                                                                                       | Yes                                                                                                                | No                                                                              |
| Salaheen (2016)            | Yes                                                              | No                                                                                            | No                                                          | Yes                                                                                    | No                                                                                                                       | Unknown                                                                                                                | No                                                                                                                                                                       | Unknown                                                                                                            | No                                                                              |
| Sanchez (2015)             | Yes                                                              | No                                                                                            | No                                                          | Yes                                                                                    | No                                                                                                                       | No                                                                                                                     | No                                                                                                                                                                       | Unknown                                                                                                            | No                                                                              |
| Sapkota (2010)             | Yes                                                              | No                                                                                            | No                                                          | Yes                                                                                    | No                                                                                                                       | Unknown                                                                                                                | Unknown                                                                                                                                                                  | Unknown                                                                                                            | Unknown                                                                         |
| Sapkota (2011)             | Yes                                                              | Yes                                                                                           | Yes                                                         | Yes                                                                                    | No                                                                                                                       | No                                                                                                                     | Yes                                                                                                                                                                      | Yes                                                                                                                | Unknown                                                                         |
| Sapkota (2014)             | Yes                                                              | Yes                                                                                           | Yes                                                         | Yes                                                                                    | No                                                                                                                       | No                                                                                                                     | Yes                                                                                                                                                                      | Yes                                                                                                                | Unknown                                                                         |
| Sato (2004a)               | Yes                                                              | No                                                                                            | Yes                                                         | Yes                                                                                    | No                                                                                                                       | Unknown                                                                                                                | Yes                                                                                                                                                                      | Yes                                                                                                                | Yes                                                                             |
| Sato (2004b)               | Yes                                                              | No                                                                                            | Yes                                                         | Yes                                                                                    | Yes                                                                                                                      | No                                                                                                                     | Unknown                                                                                                                                                                  | Yes                                                                                                                | No                                                                              |
| Sato (2005)                | Yes                                                              | No                                                                                            | Yes                                                         | Yes                                                                                    | No                                                                                                                       | Unknown                                                                                                                | Yes                                                                                                                                                                      | Yes                                                                                                                | Yes                                                                             |
| Schmidt (2015)             | Yes                                                              | No                                                                                            | No                                                          | No                                                                                     | No                                                                                                                       | Unknown                                                                                                                | Unknown                                                                                                                                                                  | Yes                                                                                                                | Unknown                                                                         |

Table 3 (continued)

| <b>First author (Year)</b> | <b>Is hypothesis/aim/objective of the study clearly defined?</b> | <b>Are the characteristics of the animals/humans included in the study clearly described?</b> | <b>Are the interventions of interest clearly described?</b> | <b>Are the main outcomes clearly described in the Introduction or Methods section?</b> | <b>Does the study provide estimates of the random variability in the data for main outcomes? (i.e. SD, 95% CI, etc.)</b> | <b>Were the subjects included in the study representative of the entire population from which they were recruited?</b> | <b>Were animals/humans included in the intervention and control groups recruited from the same source population? (i.e. Were they sampled from the same population?)</b> | <b>Were animals/humans included in the intervention and control groups recruited over the same period of time?</b> | <b>Was there adequate adjustment for important confounders in the analysis?</b> |
|----------------------------|------------------------------------------------------------------|-----------------------------------------------------------------------------------------------|-------------------------------------------------------------|----------------------------------------------------------------------------------------|--------------------------------------------------------------------------------------------------------------------------|------------------------------------------------------------------------------------------------------------------------|--------------------------------------------------------------------------------------------------------------------------------------------------------------------------|--------------------------------------------------------------------------------------------------------------------|---------------------------------------------------------------------------------|
| Schwaiger (2008)           | Yes                                                              | No                                                                                            | No                                                          | Yes                                                                                    | No                                                                                                                       | Unknown                                                                                                                | Unknown                                                                                                                                                                  | Yes                                                                                                                | No                                                                              |
| Schwaiger (2010)           | Yes                                                              | No                                                                                            | No                                                          | Yes                                                                                    | No                                                                                                                       | Unknown                                                                                                                | Unknown                                                                                                                                                                  | Yes                                                                                                                | No                                                                              |
| Siemon (2007)              | Yes                                                              | Yes                                                                                           | Yes                                                         | Yes                                                                                    | No                                                                                                                       | Unknown                                                                                                                | Unknown                                                                                                                                                                  | Yes                                                                                                                | No                                                                              |
| Sischo (2010)              | Yes                                                              | No                                                                                            | Yes                                                         | Yes                                                                                    | No                                                                                                                       | No                                                                                                                     | Yes                                                                                                                                                                      | Yes                                                                                                                | Unknown                                                                         |
| Skjøt-Rasmussen (2009)     | Yes                                                              | Yes                                                                                           | Yes                                                         | Yes                                                                                    | No                                                                                                                       | Unknown                                                                                                                | No                                                                                                                                                                       | N/A                                                                                                                | No                                                                              |
| Smith (1981)               | No                                                               | No                                                                                            | Yes                                                         | No                                                                                     | No                                                                                                                       | Yes                                                                                                                    | Unknown                                                                                                                                                                  | N/A                                                                                                                | No                                                                              |
| Smith (2013)               | No                                                               | Yes                                                                                           | No                                                          | No                                                                                     | Yes                                                                                                                      | No                                                                                                                     | Unknown                                                                                                                                                                  | Yes                                                                                                                | Unknown                                                                         |
| Soonthornchaikul (2006)    | Yes                                                              | No                                                                                            | No                                                          | Yes                                                                                    | No                                                                                                                       | No                                                                                                                     | Unknown                                                                                                                                                                  | Unknown                                                                                                            | No                                                                              |
| Sørum (2004)               | Yes                                                              | No                                                                                            | No                                                          | Yes                                                                                    | Yes                                                                                                                      | Unknown                                                                                                                | Unknown                                                                                                                                                                  | Unknown                                                                                                            | No                                                                              |
| Sørum (2006)               | Yes                                                              | No                                                                                            | Yes                                                         | Yes                                                                                    | No                                                                                                                       | No                                                                                                                     | Yes                                                                                                                                                                      | N/A                                                                                                                | No                                                                              |
| Stegeman (2006)            | Yes                                                              | No                                                                                            | Yes                                                         | Yes                                                                                    | Yes                                                                                                                      | Yes                                                                                                                    | Yes                                                                                                                                                                      | N/A                                                                                                                | Yes                                                                             |
| Struve (2010)              | Yes                                                              | Unknown                                                                                       | Unknown                                                     | Unknown                                                                                | Unknown                                                                                                                  | Unknown                                                                                                                | Unknown                                                                                                                                                                  | Unknown                                                                                                            | Unknown                                                                         |
| Suriyasathaporn (2010)     | Yes                                                              | Yes                                                                                           | Yes                                                         | Yes                                                                                    | No                                                                                                                       | Yes                                                                                                                    | Yes                                                                                                                                                                      | N/A                                                                                                                | No                                                                              |
| Tadesse (2009)             | Yes                                                              | Yes                                                                                           | No                                                          | Yes                                                                                    | No                                                                                                                       | No                                                                                                                     | No                                                                                                                                                                       | Unknown                                                                                                            | No                                                                              |
| Tamang (2015)              | Yes                                                              | Yes                                                                                           | Yes                                                         | Yes                                                                                    | No                                                                                                                       | Yes                                                                                                                    | Yes                                                                                                                                                                      | Yes                                                                                                                | No                                                                              |
| Teramoto (2016)            | Yes                                                              | No                                                                                            | No                                                          | Yes                                                                                    | No                                                                                                                       | No                                                                                                                     | No                                                                                                                                                                       | Yes                                                                                                                | No                                                                              |
| Thakur (2005)              | Yes                                                              | No                                                                                            | Yes                                                         | Yes                                                                                    | No                                                                                                                       | Unknown                                                                                                                | Yes                                                                                                                                                                      | Yes                                                                                                                | No                                                                              |
| Tikofsky (2007)            | Yes                                                              | Yes                                                                                           | Yes                                                         | Yes                                                                                    | Yes                                                                                                                      | Unknown                                                                                                                | Yes                                                                                                                                                                      | Yes                                                                                                                | No                                                                              |
| Tragesser (2006)           | Yes                                                              | No                                                                                            | Yes                                                         | Yes                                                                                    | Yes                                                                                                                      | No                                                                                                                     | Yes                                                                                                                                                                      | Unknown                                                                                                            | No                                                                              |
| Trost (2013)               | Yes                                                              | No                                                                                            | Yes                                                         | Yes                                                                                    | No                                                                                                                       | Unknown                                                                                                                | Unknown                                                                                                                                                                  | Unknown                                                                                                            | Unknown                                                                         |
| Truszczyński (2006)        | Yes                                                              | No                                                                                            | Yes                                                         | Yes                                                                                    | No                                                                                                                       | Yes                                                                                                                    | Yes                                                                                                                                                                      | N/A                                                                                                                | Unknown                                                                         |

Table 3 (continued)

| <b>First author (Year)</b> | <b>Is hypothesis/aim/objective of the study clearly defined?</b> | <b>Are the characteristics of the animals/humans included in the study clearly described?</b> | <b>Are the interventions of interest clearly described?</b> | <b>Are the main outcomes clearly described in the Introduction or Methods section?</b> | <b>Does the study provide estimates of the random variability in the data for main outcomes? (i.e. SD, 95% CI, etc.)</b> | <b>Were the subjects included in the study representative of the entire population from which they were recruited?</b> | <b>Were animals/humans included in the intervention and control groups recruited from the same source population? (i.e. Were they sampled from the same population?)</b> | <b>Were animals/humans included in the intervention and control groups recruited over the same period of time?</b> | <b>Was there adequate adjustment for important confounders in the analysis?</b> |
|----------------------------|------------------------------------------------------------------|-----------------------------------------------------------------------------------------------|-------------------------------------------------------------|----------------------------------------------------------------------------------------|--------------------------------------------------------------------------------------------------------------------------|------------------------------------------------------------------------------------------------------------------------|--------------------------------------------------------------------------------------------------------------------------------------------------------------------------|--------------------------------------------------------------------------------------------------------------------|---------------------------------------------------------------------------------|
| van den Bogaard (2000)     | Yes                                                              | No                                                                                            | Yes                                                         | Unknown                                                                                | No                                                                                                                       | Unknown                                                                                                                | Unknown                                                                                                                                                                  | N/A                                                                                                                | No                                                                              |
| van den Bogaard (2001)     | Yes                                                              | No                                                                                            | No                                                          | Yes                                                                                    | No                                                                                                                       | Unknown                                                                                                                | No                                                                                                                                                                       | Unknown                                                                                                            | No                                                                              |
| Veldman (2014)             | No                                                               | No                                                                                            | No                                                          | No                                                                                     | No                                                                                                                       | Yes                                                                                                                    | Yes                                                                                                                                                                      | N/A                                                                                                                | No                                                                              |
| Walk (2007)                | Yes                                                              | Yes                                                                                           | Yes                                                         | Yes                                                                                    | No                                                                                                                       | Yes                                                                                                                    | Yes                                                                                                                                                                      | Yes                                                                                                                | Yes                                                                             |
| Wanninger (2016)           | Yes                                                              | No                                                                                            | No                                                          | Yes                                                                                    | Yes                                                                                                                      | Unknown                                                                                                                | Unknown                                                                                                                                                                  | Yes                                                                                                                | No                                                                              |
| Warnick (2015)             | Yes                                                              | No                                                                                            | No                                                          | Yes                                                                                    | Yes                                                                                                                      | Unknown                                                                                                                | Unknown                                                                                                                                                                  | Yes                                                                                                                | Yes                                                                             |
| Wyckoff (2012)             | Yes                                                              | No                                                                                            | Yes                                                         | Yes                                                                                    | No                                                                                                                       | Unknown                                                                                                                | Yes                                                                                                                                                                      | Yes                                                                                                                | Unknown                                                                         |
| Zawack (2016)              | Yes                                                              | No                                                                                            | No                                                          | No                                                                                     | No                                                                                                                       | Unknown                                                                                                                | Unknown                                                                                                                                                                  | N/A                                                                                                                | No                                                                              |
| Zhang (2005)               | Yes                                                              | No                                                                                            | No                                                          | Yes                                                                                    | No                                                                                                                       | Unknown                                                                                                                | Unknown                                                                                                                                                                  | Yes                                                                                                                | No                                                                              |
| Zhang (2010)               | Yes                                                              | Yes                                                                                           | No                                                          | Yes                                                                                    | No                                                                                                                       | Yes                                                                                                                    | Yes                                                                                                                                                                      | Yes                                                                                                                | No                                                                              |
| Zhang (2011)               | Yes                                                              | Yes                                                                                           | No                                                          | Yes                                                                                    | No                                                                                                                       | No                                                                                                                     | Yes                                                                                                                                                                      | Yes                                                                                                                | No                                                                              |
| Zwonitzer (2016)           | Yes                                                              | No                                                                                            | No                                                          | Yes                                                                                    | No                                                                                                                       | Unknown                                                                                                                | No                                                                                                                                                                       | Yes                                                                                                                | No                                                                              |

Yes - study quality criteria met; No - study quality criteria not met; Unknown - insufficient information to assess study quality

Abbreviations: N/A - not applicable, NR - not reported

**Table 4: Assessment of study quality for individual human studies**

| First author (Year)              | Is hypothesis/aim/objective of the study clearly defined? | Are the characteristics of the animals/humans included in the study clearly described? | Are the interventions of interest clearly described? | Are the main outcomes clearly described in the Introduction or Methods section? | Does the study provide estimates of the random variability in the data for main outcomes? (I.e. SD, 95% CI, etc.) | Were the subjects included in the study representative of the entire population from which they were recruited? | Were animals/humans included in the intervention and control groups recruited from the same source population? (I.e. Were they sampled from the same population?) | Were animals/humans included in the intervention and control groups recruited over the same period of time? | Was there adequate adjustment for important confounders in the analysis? |
|----------------------------------|-----------------------------------------------------------|----------------------------------------------------------------------------------------|------------------------------------------------------|---------------------------------------------------------------------------------|-------------------------------------------------------------------------------------------------------------------|-----------------------------------------------------------------------------------------------------------------|-------------------------------------------------------------------------------------------------------------------------------------------------------------------|-------------------------------------------------------------------------------------------------------------|--------------------------------------------------------------------------|
| Borgen (2000)                    | Yes                                                       | Unknown                                                                                | Yes                                                  | Yes                                                                             | Yes                                                                                                               | Unknown                                                                                                         | Yes                                                                                                                                                               | Yes                                                                                                         | No                                                                       |
| Coalition for Animal Health (NR) | Yes                                                       | No                                                                                     | Yes                                                  | Yes                                                                             | No                                                                                                                | Unknown                                                                                                         | Unknown                                                                                                                                                           | N/A                                                                                                         | No                                                                       |
| Cuny (2012)                      | No                                                        | Unknown                                                                                | Unknown                                              | Unknown                                                                         | No                                                                                                                | No                                                                                                              | Yes                                                                                                                                                               | Unknown                                                                                                     | No                                                                       |
| Dorado-García (2015a)            | Yes                                                       | No                                                                                     | No                                                   | No                                                                              | Yes                                                                                                               | Unknown                                                                                                         | Unknown                                                                                                                                                           | Yes                                                                                                         | Unknown                                                                  |
| Dorado-García (2015b)            | Yes                                                       | Yes                                                                                    | Yes                                                  | Yes                                                                             | Yes                                                                                                               | No                                                                                                              | No                                                                                                                                                                | Yes                                                                                                         | Yes                                                                      |
| Dutil (2010)                     | Yes                                                       | No                                                                                     | Yes                                                  | Yes                                                                             | No                                                                                                                | Yes                                                                                                             | Yes                                                                                                                                                               | No                                                                                                          | Unknown                                                                  |
| Gallay (2007)                    | Yes                                                       | No                                                                                     | No                                                   | Yes                                                                             | No                                                                                                                | Yes                                                                                                             | Yes                                                                                                                                                               | Yes                                                                                                         | Unknown                                                                  |
| Harper (2009)                    | Yes                                                       | Yes                                                                                    | No                                                   | No                                                                              | Unknown                                                                                                           | Unknown                                                                                                         | Unknown                                                                                                                                                           | Unknown                                                                                                     | Unknown                                                                  |
| Huijbers (2015)                  | Yes                                                       | Yes                                                                                    | Yes                                                  | Yes                                                                             | Yes                                                                                                               | Yes                                                                                                             | No                                                                                                                                                                | Unknown                                                                                                     | Unknown                                                                  |
| Johnson (2007)                   | Yes                                                       | Yes                                                                                    | No                                                   | Yes                                                                             | No                                                                                                                | Unknown                                                                                                         | Unknown                                                                                                                                                           | Unknown                                                                                                     | Yes                                                                      |
| Kieke (2006)                     | Yes                                                       | Yes                                                                                    | Yes                                                  | Yes                                                                             | Yes                                                                                                               | No                                                                                                              | No                                                                                                                                                                | No                                                                                                          | Yes                                                                      |
| Klare (1999)                     | Yes                                                       | No                                                                                     | Yes                                                  | Yes                                                                             | No                                                                                                                | No                                                                                                              | Yes                                                                                                                                                               | N/A                                                                                                         | No                                                                       |
| Kruse (1999)                     | No                                                        | No                                                                                     | Yes                                                  | Yes                                                                             | No                                                                                                                | Unknown                                                                                                         | Unknown                                                                                                                                                           | No                                                                                                          | No                                                                       |
| Kühn (2005)                      | Yes                                                       | Yes                                                                                    | Yes                                                  | Yes                                                                             | No                                                                                                                | Unknown                                                                                                         | No                                                                                                                                                                | No                                                                                                          | Unknown                                                                  |
| Osadebe (2012)                   | Yes                                                       | Yes                                                                                    | Yes                                                  | Yes                                                                             | No                                                                                                                | Unknown                                                                                                         | Yes                                                                                                                                                               | Yes                                                                                                         | Yes                                                                      |
| Rinsky (2013)                    | Yes                                                       | Yes                                                                                    | Yes                                                  | Yes                                                                             | Yes                                                                                                               | No                                                                                                              | No                                                                                                                                                                | Yes                                                                                                         | No                                                                       |
| Skjõt-Rasmussen (2009)           | Yes                                                       | No                                                                                     | Yes                                                  | Yes                                                                             | No                                                                                                                | Unknown                                                                                                         | No                                                                                                                                                                | N/A                                                                                                         | No                                                                       |
| Smith (2013)                     | No                                                        | Yes                                                                                    | No                                                   | No                                                                              | Yes                                                                                                               | No                                                                                                              | Unknown                                                                                                                                                           | Yes                                                                                                         | No                                                                       |

Table 4 (continued)

| <b>First author (Year)</b> | <b>Is hypothesis/aim/objective of the study clearly defined?</b> | <b>Are the characteristics of the animals/humans included in the study clearly described?</b> | <b>Are the interventions of interest clearly described?</b> | <b>Are the main outcomes clearly described in the Introduction or Methods section?</b> | <b>Does the study provide estimates of the random variability in the data for main outcomes? (I.e. SD, 95% CI, etc.)</b> | <b>Were the subjects included in the study representative of the entire population from which they were recruited?</b> | <b>Were animals/humans included in the intervention and control groups recruited from the same source population? (I.e. Were they sampled from the same population?)</b> | <b>Were animals/humans included in the intervention and control groups recruited over the same period of time?</b> | <b>Was there adequate adjustment for important confounders in the analysis?</b> |
|----------------------------|------------------------------------------------------------------|-----------------------------------------------------------------------------------------------|-------------------------------------------------------------|----------------------------------------------------------------------------------------|--------------------------------------------------------------------------------------------------------------------------|------------------------------------------------------------------------------------------------------------------------|--------------------------------------------------------------------------------------------------------------------------------------------------------------------------|--------------------------------------------------------------------------------------------------------------------|---------------------------------------------------------------------------------|
| Sørum (2006)               | Yes                                                              | No                                                                                            | Yes                                                         | Yes                                                                                    | No                                                                                                                       | No                                                                                                                     | Yes                                                                                                                                                                      | N/A                                                                                                                | No                                                                              |
| van den Bogaard (2000)     | Yes                                                              | No                                                                                            | Yes                                                         | Unknown                                                                                | No                                                                                                                       | Unknown                                                                                                                | Unknown                                                                                                                                                                  | N/A                                                                                                                | No                                                                              |
| van den Bogaard (2001)     | Yes                                                              | No                                                                                            | No                                                          | Yes                                                                                    | No                                                                                                                       | Unknown                                                                                                                | No                                                                                                                                                                       | Unknown                                                                                                            | No                                                                              |

Yes- study quality criteria met; No- study quality criteria not met; Unknown- insufficient information to assess study quality  
Abbreviations: NR- year not reported; N/A- not applicable











**Figure 2: Funnel plot for animal (Panel A) and human (Panel B) studies included in meta-analysis**

**A: Animal Studies**

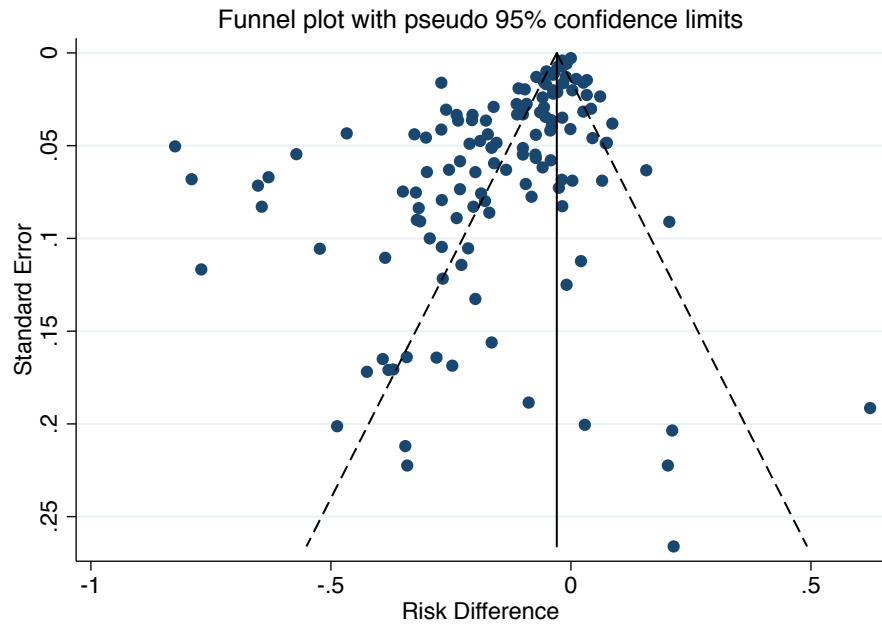

**B: Human Studies**

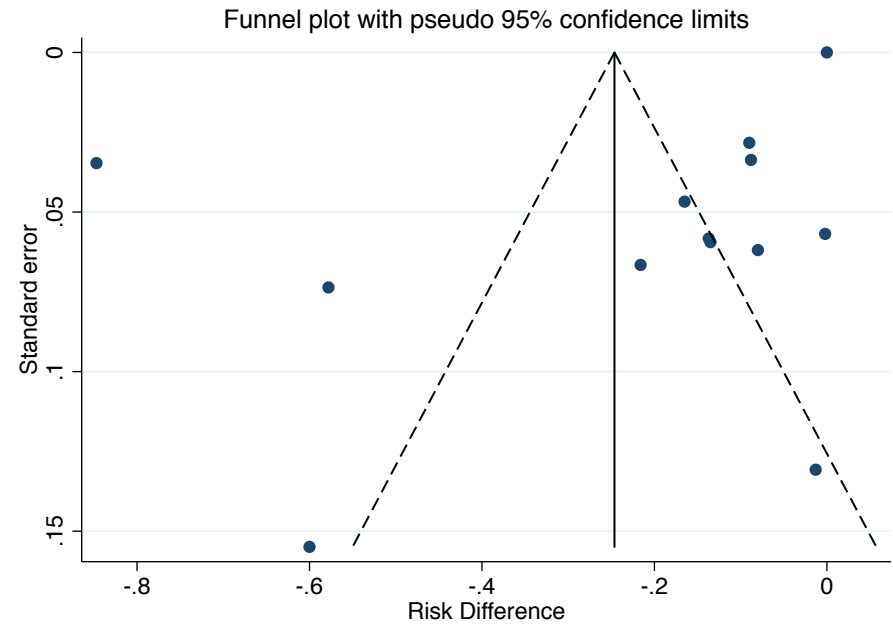

## References for included studies

1. Aarestrup FM. Occurrence of glycopeptide resistance among *Enterococcus faecium* isolates from conventional and ecological poultry farms. *Microb Drug Resist* 1995; **1**(3): 255-7.
2. Aarestrup FM, Bager F, Andersen JS. Association between the use of avilamycin for growth promotion and the occurrence of resistance among *Enterococcus faecium* from broilers: epidemiological study and changes over time. *Microb Drug Resist* 2000; **6**(1): 71-5.
3. Aarestrup FM, Kruse H, Tast E, Hammerum AM, Jensen LB. Associations between the use of antimicrobial agents for growth promotion and the occurrence of resistance among *Enterococcus faecium* from broilers and pigs in Denmark, Finland, and Norway. *Microb Drug Resist* 2000; **6**(1): 63-70.
4. Aarestrup FM, Seyfarth AM, Emborg HD, Pedersen K, Hendriksen RS, Bager F. Effect of abolishment of the use of antimicrobial agents for growth promotion on occurrence of antimicrobial resistance in fecal enterococci from food animals in Denmark. *Antimicrob Agents Chemother* 2001; **45**(7): 2054-9.
5. Aarestrup FM, Hasman H, Jensen LB, et al. Antimicrobial resistance among enterococci from pigs in three European countries. *Appl Environ Microbiol* 2002; **68**(8): 4127-9.
6. Abdalrahman LS, Stanley A, Wells H, Fakhr MK. Isolation, Virulence, and Antimicrobial Resistance of Methicillin-Resistant *Staphylococcus aureus* (MRSA) and Methicillin Sensitive *Staphylococcus aureus* (MSSA) Strains from Oklahoma Retail Poultry Meats. *Int J Environ Res Public Health* 2015; **12**(6): 6148-61.
7. Agero Y, Aarestrup FM. Voluntary ban on cephalosporin use in Danish pig production has effectively reduced extended-spectrum cephalosporinase-producing *Escherichia coli* in slaughter pigs. *Journal of Antimicrobial Chemotherapy* 2013; **68**(3): 569-72.
8. Agga GE, Schmidt JW, Arthur TM. Antimicrobial resistance of enteric bacteria among ceftiofur treated and non-antimicrobial treated co-mingled pasture beef cows. 4th ASM Conference on Antimicrobial resistance in zoonotic bacteria and foodborne pathogens; 2015 8-11 May 2015; Washington, United States; 2015. p. 39-40.
9. Alali WQ, Thakur S, Berghaus RD, Martin MP, Gebreyes WA. Prevalence and distribution of *Salmonella* in organic and conventional broiler poultry farms. *Foodborne Pathog Dis* 2010; **7**(11): 1363-71.
10. Alvarez-Fernandez E, Dominguez-Rodriguez J, Capita R, Alonso-Calleja C. Influence of housing systems on microbial load and antimicrobial resistance patterns of *Escherichia coli* isolates from eggs produced for human consumption. *Journal of Food Protection* 2012; **75**(5): 847-53.
11. Alvarez-Fernandez E, Cancelo A, Diaz-Vega C, Capita R, Alonso-Calleja C. Antimicrobial resistance in *E. coli* isolates from conventionally and organically reared poultry: A comparison of agar disc diffusion and Sensi Test Gram-negative methods. *Food Control* 2013; **30**(1): 227-34.
12. Avrain L, Humbert F, L'Hospitalier R, Sanders P, Vernozy-Rozand C, Kempf I. Antimicrobial resistance in *Campylobacter* from broilers: association with production type and antimicrobial use. *Vet Microbiol* 2003; **96**(3): 267-76.
13. Bager F, Aarestrup FM, Madsen M, Wegener HC. Glycopeptide resistance in *Enterococcus faecium* from broilers and pigs following discontinued use of avoparcin. *Microbial Drug Resistance* 1999; **5**(1): 53-6.

14. Barlow RS, Fegan N, Gobius KS. A comparison of antibiotic resistance integrons in cattle from separate beef meat production systems at slaughter. *Journal of Applied Microbiology* 2008; **104**(3): 651-8.
15. Barlow RS, Fegan N, Gobius KS. Integron-containing bacteria in faeces of cattle from different production systems at slaughter. *Journal of Applied Microbiology* 2009; **107**(2): 540-5.
16. Bauer-Garland J, Frye JG, Gray JT, Berrang ME, Harrison MA, Fedorka-Cray PJ. Transmission of *Salmonella enterica* serotype Typhimurium in poultry with and without antimicrobial selective pressure. *Journal of Applied Microbiology* 2006; **101**(6): 1301-8.
17. Bengtsson B, Wierup M. Antimicrobial resistance in Scandinavia after ban of antimicrobial growth promoters. *Animal Biotechnology* 2006; **17**(2): 147-56.
18. Bennedsgaard TW, Thamsborg SM, Aarestrup FM, Enevoldsen C, Vaarst M, Christoffersen AB. Resistance to penicillin of *Staphylococcus aureus* isolates from cows with high somatic cell counts in organic and conventional dairy herds in Denmark. *Acta Vet Scand* 2006; **48**: 24.
19. Boerlin P, Wissing A, Aarestrup FM, Frey J, Nicolet J. Antimicrobial growth promoter ban and resistance to macrolides and vancomycin in enterococci from pigs. *J Clin Microbiol* 2001; **39**(11): 4193-5.
20. Bombyk RAM, Helland TJ, Wyckoff TJO. Characterization of tetracycline resistance determinants in *Staphylococcus* from conventional and organic dairy cows in west-central Minnesota. *Abstracts of the General Meeting of the American Society for Microbiology* 2007; **107**: 744.
21. Bombyk RA, Bykowski AL, Draper CE, Savelkoul EJ, Sullivan LR, Wyckoff TJ. Comparison of types and antimicrobial susceptibility of *Staphylococcus* from conventional and organic dairies in west-central Minnesota, USA. *Journal of Applied Microbiology* 2008; **104**(6): 1726-31.
22. Borgen K, Simonsen GS, Sundsfjord A, Wasteson Y, Olsvik O, Kruse H. Continuing high prevalence of VanA-type vancomycin-resistant enterococci on Norwegian poultry farms three years after avoparcin was banned. *Journal of Applied Microbiology* 2000; **89**(3): 478-85.
23. Borgen K, Sørum M, Wasteson Y, Kruse H. VanA-type vancomycin-resistant enterococci (VRE) remain prevalent in poultry carcasses 3 years after avoparcin was banned. *Int J Food Microbiol* 2001; **64**(1-2): 89-94.
24. Boutet P, Detilleux J, Motkin M, et al. A comparison of somatic cell count and antimicrobial susceptibility of subclinical mastitis pathogens in organic and conventional dairy herds. / Comparaison du taux cellulaire et de la sensibilité antimicrobienne des germes responsables de mammite subclinique bovine entre les filières conventionnelle et biologique. *Annales de Médecine Vétérinaire* 2005; **149**(3): 173-82.
25. Boyer TC. Antibiotic resistance in the lower intestinal microbiota of dairy cattle: Longitudinal analysis of phenotypic and genotypic resistance [Ph.D.]. Ann Arbor: University of Minnesota; 2012.
26. Bunner CA, Norby B, Bartlett PC, Erskine RJ, Downes FP, Kaneene JB. Prevalence and pattern of antimicrobial susceptibility in *Escherichia coli* isolated from pigs reared under antimicrobial-free and conventional production methods. *J Am Vet Med Assoc* 2007; **231**(2): 275-83.
27. Buntenkoetter V, Blaha T, Tegeler R, et al. Comparison of the phenotypic antimicrobial resistances and spa-types of methicillin-resistant *Staphylococcus aureus* (MRSA) isolates

- derived from pigs in conventional and in organic husbandry systems. *Berl Munch Tierarztl Wochenschr* 2014; **127**(3-4): 135-43.
28. Butaye P, Devriese LA, Goossens H, Ieven M, Haesebrouck F. Enterococci with acquired vancomycin resistance in pigs and chickens of different age groups. *Antimicrobial Agents and Chemotherapy* 1999; **43**(2): 365-66.
  29. Cho S, Bender JB, Diez-Gonzalez F, et al. Prevalence and characterization of Escherichia coli O157 isolates from Minnesota dairy farms and county fairs. *Journal of Food Protection* 2006; **69**(2): 252-9.
  30. Cho S, Fossler CP, Diez-Gonzalez F, et al. Antimicrobial susceptibility of Shiga toxin-producing Escherichia coli isolated from organic dairy farms, conventional dairy farms, and county fairs in Minnesota. *Foodborne Pathog Dis* 2007; **4**(2): 178-86.
  31. Cicconi-Hogan KM, Belomestnykh N, Gamroth M, Ruegg PL, Tikofsky L, Schukken YH. Prevalence of methicillin resistance in coagulase-negative staphylococci and Staphylococcus aureus isolated from bulk milk on organic and conventional dairy farms in the United States. *Journal of Dairy Science* 2014; **97**(5): 2959-64.
  32. Canada Go. Reductions in Antimicrobial Use and Resistance: Preliminary Evidence of the Effect of the Canadian Chicken Industry's Elimination of Use of Antimicrobials of Very High Importance to Human Medicine. Government of Canada; 2016. p. 1-5.
  33. Coalition for Animal Health. Political Bans on Antibiotics are Counterproductive. European Test Case: Increased Animal Disease, Mixed Human Health Benefit, nd.
  34. Cohen Stuart J, van den Munckhof T, Voets G, Scharringa J, Fluit A, Hall ML. Comparison of ESBL contamination in organic and conventional retail chicken meat. *Int J Food Microbiol* 2012; **154**(3): 212-4.
  35. Cui S. Detection and characterization of Escherichia coli O157:H7 and Salmonella in food [Ph.D.]. Ann Arbor: University of Maryland, College Park; 2004.
  36. Cui S, Ge B, Zheng J, Meng J. Prevalence and antimicrobial resistance of Campylobacter spp. and Salmonella serovars in organic chickens from Maryland retail stores. *Appl Environ Microbiol* 2005; **71**(7): 4108-11.
  37. Cuny C, Friedrich AW, Witte W. Absence of Livestock-Associated Methicillin-Resistant Staphylococcus aureus Clonal Complex CC398 as a Nasal Colonizer of Pigs Raised in an Alternative System. *Applied and Environmental Microbiology* 2012; **78**(4): 1296-7.
  38. Del Grosso M, Caprioli A, Chinzari P, et al. Detection and Characterization of Vancomycin-Resistant Enterococci in Farm Animals and Raw Meat Products in Italy. *Microbial Drug Resistance* 2000; **6**(4): 313-8.
  39. Desmots MH, Dufour-Gesbert F, Avrain L, Kempf I. Antimicrobial resistance in Campylobacter strains isolated from French broilers before and after antimicrobial growth promoter bans. *Journal of antimicrobial chemotherapy* 2004; **54**(6): 1025-30.
  40. Docic M, Bilkei G. Differences in antibiotic resistance in Escherichia coli, isolated from East-European swine herds with or without prophylactic use of antibiotics. *J Vet Med B Infect Dis Vet Public Health* 2003; **50**(1): 27-30.
  41. Dolejska M, Jurcickova Z, Literak I, et al. IncN plasmids carrying bla CTX-M-1 in Escherichia coli isolates on a dairy farm. *Vet Microbiol* 2011; **149**(3-4): 513-6.
  42. Dorado-García A, Bos ME, Dohmen W, Verstappen KM, Wagenaar JA, Heederik DJ. Intervention Measures Reducing Livestock-Associated MRSA on Pig Farms in The Netherlands: A Longitudinal Study. 3rd ASM-ESCMID Conference on Methicillin-resistant Staphylococci in Animals: Veterinary and Public Health Implications; 2013; Copenhagen, Denmark; 2013. p. 35.

43. Dorado-Garcia A, Dohmen W, Bos ME, et al. Dose-response relationship between antimicrobial drugs and livestock-associated MRSA in pig farming. *Emerg Infect Dis* 2015; **21**(6): 950-9.
44. Dorado-Garcia A, Graveland H, Bos ME, et al. Effects of Reducing Antimicrobial Use and Applying a Cleaning and Disinfection Program in Veal Calf Farming: Experiences from an Intervention Study to Control Livestock-Associated MRSA.[Erratum appears in PLoS One. 2015;10(9):e0139536; PMID: 26413843]. *PLoS ONE* 2015; **10**(8): e0135826.
45. Dorado-Garcia A, Mevius DJ, Jacobs JJH, et al. Quantitative assessment of antimicrobial resistance in livestock during the course of a nationwide antimicrobial use reduction in the Netherlands. *Journal of Antimicrobial Chemotherapy* 2016; **71**(12): 3607-19.
46. Dutil L, Irwin R, Finley R, et al. Ceftiofur resistance in *Salmonella enterica* serovar Heidelberg from chicken meat and humans, Canada. *Emerg Infect Dis* 2010; **16**(1): 48-54.
47. El-Shibiny A, Connerton PL, Connerton IF. Enumeration and diversity of campylobacters and bacteriophages isolated during the rearing cycles of free-range and organic chickens. *Appl Environ Microbiol* 2005; **71**(3): 1259-66.
48. Emborg HD, Andersen JS, Seyfarth AM, Andersen SR, Boel J, Wegener HC. Relations between the occurrence of resistance to antimicrobial growth promoters among *Enterococcus faecium* isolated from broilers and broiler meat. *Int J Food Microbiol* 2003; **84**(3): 273-84.
49. Fraqueza MJ, Martins A, Borges AC, et al. Antimicrobial resistance among *Campylobacter* spp. strains isolated from different poultry production systems at slaughterhouse level. *Poultry Science* 2014; **93**(6): 1578-86.
50. Gallay A, Prouzet-Mauleon V, Kempf I, et al. *Campylobacter* antimicrobial drug resistance among humans, broiler chickens, and pigs, France. *Emerg Infect Dis* 2007; **13**(2): 259-66.
51. Garcia-Migura L, Pleydell E, Barnes S, Davies RH, Liebana E. Characterization of vancomycin-resistant *Enterococcus faecium* isolates from broiler poultry and pig farms in England and Wales. *J Clin Microbiol* 2005; **43**(7): 3283-9.
52. Garmo RT, Waage S, Sviland S, Henriksen BI, Osteras O, Reksen O. Reproductive performance, udder health, and antibiotic resistance in mastitis bacteria isolated from Norwegian Red cows in conventional and organic farming. *Acta Vet Scand* 2010; **52**: 11.
53. Ge B, Zheng J, Meng J. Antimicrobial susceptibility of *Campylobacter* from retail organic and conventional chickens. Abstracts of the Interscience Conference on Antimicrobial Agents and Chemotherapy; 2004 Oct-Nov; 2004. p. 92.
54. Gebreyes WA, Thakur S, Morrow WEM. Comparison of Prevalence, Antimicrobial Resistance, and Occurrence of Multidrug-Resistant *Salmonella* in Antimicrobial-Free and Conventional Pig Production. *Journal of Food Protection* 2006; **69**(4): 743-8.
55. Gellin G, Langlois BE, Dawson KA, Aaron DK. Antibiotic resistance of gram-negative enteric bacteria from pigs in three herds with different histories of antibiotic exposure. *Applied and Environmental Microbiology* 1989; **55**(9).
56. Gerzova L, Babak V, Sedlar K, et al. Characterization of antibiotic resistance gene abundance and microbiota composition in feces of organic and conventional pigs from four EU countries. *PLoS ONE* 2015; **10**(7): e0132892-e.
57. Guarddon M, Miranda JM, Rodríguez JA, Vázquez BI, Cepeda A, Franco CM. Quantitative detection of tetracycline-resistant microorganisms in conventional and organic beef, pork and chicken meat. *CyTA - Journal of Food* 2014; **12**(4): 383-8.



58. Halbert LW, Kaneene JB, Linz J, et al. Genetic mechanisms contributing to reduced tetracycline susceptibility of *Campylobacter* isolated from organic and conventional dairy farms in the midwestern and northeastern United States. *Journal of Food Protection* 2006; **69**(3): 482-8.
59. Halbert LW, Kaneene JB, Ruegg PL, et al. Evaluation of antimicrobial susceptibility patterns in *Campylobacter* spp isolated from dairy cattle and farms managed organically and conventionally in the midwestern and northeastern United States. *J Am Vet Med Assoc* 2006; **228**(7): 1074-81.
60. Hammerum AM, Heuer OE, Emborg HD, et al. Danish integrated antimicrobial resistance monitoring and research program. *Emerg Infect Dis* 2007; **13**(11): 1632-9.
61. Han F, Lestari SI, Pu S, Ge B. Prevalence and antimicrobial resistance among *Campylobacter* spp. in Louisiana retail chickens after the enrofloxacin ban. *Foodborne Pathog Dis* 2009; **6**(2): 163-71.
62. Harper AL, Male AJ, Scheibel RP, Hanson BM, Wardyn SE, Smith TC. Prevalence of methicillin-resistant *Staphylococcus aureus* (MRSA) in organic and confinement swine operations in the Midwestern United States. ESCMID/ASM Conference; 2009; London, UK; 2009. p. 16-7.
63. Harvey R, Funk J, Wittum TE, Hoet AE. A metagenomic approach for determining prevalence of tetracycline resistance genes in the fecal flora of conventionally raised feedlot steers and feedlot steers raised without antimicrobials. *American Journal of Veterinary Research* 2009; **70**(2): 198-202.
64. Hässig M, Eugster S, Lewis FI. Herd level antimicrobial resistance in beef calves in Switzerland 1986 through 2011. *Open Journal of Veterinary Medicine* 2014; **4**(11): 247-54.
65. Heuer OE, Pedersen K, Andersen JS, Madsen M. Prevalence and antimicrobial susceptibility of thermophilic *Campylobacter* in organic and conventional broiler flocks. *Lett Appl Microbiol* 2001; **33**(4): 269-74.
66. Heuer OE, Pedersen K, Andersen JS, Madsen M. Vancomycin-resistant enterococci (VRE) in broiler flocks 5 years after the avoparcin ban. *Microb Drug Resist* 2002; **8**(2): 133-8.
67. Hiki M, Kawanishi M, Abo H, et al. Decreased Resistance to Broad-Spectrum Cephalosporin in *Escherichia coli* from Healthy Broilers at Farms in Japan After Voluntary Withdrawal of Ceftiofur. *Foodborne Pathog Dis* 2015; **12**(7): 639-43.
68. Hiroi M, Matsui S, Kubo R, et al. Factors for Occurrence of Extended-Spectrum beta-Lactamase-Producing *Escherichia coli* in Broilers. *J Vet Med Sci* 2012; **74**(12): 1635-7.
69. Hoogenboom LA, Bokhorst JG, Northolt MD, et al. Contaminants and microorganisms in Dutch organic food products: a comparison with conventional products. *Food Addit Contam Part A Chem Anal Control Expo Risk Assess* 2008; **25**(10): 1195-207.
70. Huijbers PM, van Hoek AH, Graat EA, et al. Methicillin-resistant *Staphylococcus aureus* and extended-spectrum and AmpC beta-lactamase-producing *Escherichia coli* in broilers and in people living and/or working on organic broiler farms. *Vet Microbiol* 2015; **176**(1-2): 120-5.
71. Jensen HH, Hayes DJ. Impact of Denmark's ban on antimicrobials for growth promotion. *Current Opinion in Microbiology* 2014; **19**: 30-6.
72. Johnson JR, Sannes MR, Croy C, et al. Antimicrobial drug-resistant *Escherichia coli* from humans and poultry products, Minnesota and Wisconsin, 2002-2004. *Emerg Infect Dis* 2007; **13**(6): 838-46.
73. Johnston JR. A comparison of antibiotic resistance in bacteria isolated from conventionally versus organically raised livestock. *BIOS (Ocean Grove)* 2002; **73**(2): 47-51.

74. Joseph SW, Paramadhas R, Cullen P, et al. Reduced Resistance to Antibiotics among *Enterococcus faecium* of Organic Poultry Farm Origin. *Abstracts of the Interscience Conference on Antimicrobial Agents and Chemotherapy* 2007; **47**: 95-6.
75. Joseph S, Sapkota A, Cullen P, et al. Reduced resistance to antibiotics among salmonella spp. recovered from U.S. organic poultry farms. Antimicrobial resistance in zoonotic bacteria and foodborne pathogens in animals, humans and the environment: American Society for Microbiology; 2008. p. 17.
76. Kassem II, Kehinde O, Kumar A, Rajashekara G. Antimicrobial-Resistant *Campylobacter* in Organically and Conventionally Raised Layer Chickens. *Foodborne Pathog Dis* 2017; **14**(1): 29-34.
77. Keelara Veerappa S. Molecular Epidemiology of Salmonella Isolated from Pigs Reared in Distinct Swine Production Systems and Humans [Ph.D.]. Ann Arbor: North Carolina State University; 2013.
78. Kerouanton A, Rose V, Chidaine B, Kempf I, Denis M. Comparison of organic and conventional pig productions on prevalence, antibiotic resistance and genetic diversity of *Escherichia coli* [Conference poster]. / Résistance à la tétracycline et diversité génétique d'*Escherichia coli* isolés de porcs biologiques et de porcs conventionnels. *Journées de la Recherche Porcine en France* 2014; **46**: 179-80.
79. Khachatryan AR, Besser TE, Hancock DD, Call DR. Use of a Nonmedicated Dietary Supplement Correlates with Increased Prevalence of Streptomycin-Sulfa-Tetracycline-Resistant *Escherichia coli* on a Dairy Farm. *Applied and Environmental Microbiology* 2006; **72**(7): 4583-8.
80. Kieke AL, Borchardt MA, Kieke BA, et al. Use of Streptogramin Growth Promoters in Poultry and Isolation of Streptogramin-Resistant *Enterococcus faecium* from Humans. *The Journal of Infectious Diseases* 2006; **194**(9): 1200-8.
81. Kilonzo-Nthenge A, Brown A, Nahashon SN, Long D. Occurrence and antimicrobial resistance of enterococci isolated from organic and conventional retail chicken. *Journal of Food Protection* 2015; **78**(4): 760-6.
82. Kola A, Kohler C, Pfeifer Y, et al. High prevalence of extended-spectrum- $\beta$ -lactamase-producing Enterobacteriaceae in organic and conventional retail chicken meat, Germany. *Journal of Antimicrobial Chemotherapy* 2012; **67**(11): 2631-4.
83. Kruse H, Johansen BK, Rorvik LM, Schaller G. The Use of Avoparcin as a Growth Promoter and the Occurrence of Vancomycin-Resistant *Enterococcus* Species in Norwegian Poultry and Swine Production. *Microbial Drug Resistance* 1999; **5**(2): 135-9.
84. Kuhn I, Iversen A, Finn M, et al. Occurrence and relatedness of vancomycin-resistant enterococci in animals, humans, and the environment in different European regions. *Appl Environ Microbiol* 2005; **71**(9): 5383-90.
85. Lam TJGM, Engelen Ev, Scherpenzeel CGM, Hage JJ. Strategies to reduce antibiotic usage in dairy cattle in the Netherlands. *Cattle Practice* 2012; **20**(3): 163-71.
86. Langlois BE, Cromwell GL, Stahly TS, Dawson KA, Hays VW. Antibiotic resistance of fecal coliforms after long-term withdrawal of therapeutic and subtherapeutic antibiotic use in a swine herd. *Appl Environ Microbiol* 1983; **46**(6): 1433-4.
87. Langlois BE, Dawson K, Cromwell G, Stahly T. Antibiotic resistance in pigs following a 13 year ban. *Journal of Animal Science* 1986; **62**(Suppl. 3): 18-32.

88. Larsen JL, Nielsen NC. Influence of restrictive use of antibiotics on the development of drug resistance in intestinal *Escherichia coli* from pigs (author's transl). *Nord Vet Med* 1975; **27**(7-8): 353-64.
89. Lauderdale TL, Shiao YR, Wang HY, et al. Effect of banning vancomycin analogue avoparcin on vancomycin-resistant enterococci in chicken farms in Taiwan. *Environ Microbiol* 2007; **9**(3): 819-23.
90. Lebek G, Gubelmann P. Six years of official restriction on the use of antibiotics as feed additives in Switzerland. Random bacteriological sampling of faeces on farms. / Sechs Jahre gesetzlich angeordnete Abstinenz von therapeutisch genutzten Antibiotika als nutritive Futterzusätze in der Schweiz-Tierfaeces-Stichproben in einigen landwirtschaftlichen Betrieben. *Schweizer Archiv für Tierheilkunde* 1979; **121**(6): 295-309.
91. Lee SK, Chon JW, Song KY, Hyeon JY, Moon JS, Seo KH. Prevalence, characterization, and antimicrobial susceptibility of *Salmonella Gallinarum* isolated from eggs produced in conventional or organic farms in South Korea. *Poultry Science* 2013; **92**(10): 2789-97.
92. LeJeune JT, Christie NP. Microbiological quality of ground beef from conventionally-reared cattle and "raised without antibiotics" label claims. *Journal of Food Protection* 2004; **67**(7): 1433-37.
93. Lenart-Boron A, Augustyniak K, Boron P. Screening of antimicrobial resistance and molecular detection of fluoroquinolone resistance mechanisms in chicken faeces-derived *Escherichia coli*. *Veterinární Medicina* 2016; **61**(2): 80-9.
94. Lestari SI, Han F, Wang F, Ge B. Prevalence and antimicrobial resistance of *Salmonella* serovars in conventional and organic chickens from Louisiana retail stores. *Journal of Food Protection* 2009; **72**(6): 1165-72.
95. Looft T, Johnson TA, Allen HK, et al. In-feed antibiotic effects on the swine intestinal microbiome. *Proceedings of the National Academy of Sciences of the United States of America* 2012; **109**(5): 1691-6.
96. Lou R. Dietary mannan-oligosaccharide as an approach for altering prevalence of antibiotic resistance and distribution of tetracycline resistance determinants in fecal bacteria from swine [Ph.D.]. Ann Arbor: University of Kentucky; 1995.
97. Luangtongkum T, Morishita TY, Ison AJ, Huang S, McDermott PF, Zhang Q. Effect of conventional and organic production practices on the prevalence and antimicrobial resistance of *Campylobacter* spp. in poultry. *Appl Environ Microbiol* 2006; **72**(5): 3600-7.
98. Mathew AG, Beckmann MA, Saxton AM. A comparison of antibiotic resistance in bacteria isolated from swine herds in which antibiotics were used or excluded. *Journal of Swine Health and Production* 2001; **9**(3): 125-9.
99. Mazengia E, Samadpour M, Hill HW, et al. Prevalence, Concentrations, and Antibiotic Sensitivities of *Salmonella* Serovars in Poultry from Retail Establishments in Seattle, Washington. *Journal of Food Protection* 2014; **77**(6): 885-93.
100. Meemken D, Blaha T. Research on the occurrence of methicillin-resistant *Staphylococcus aureus* (MRSA) in domestic pigs and wild boars in Germany. / Untersuchungen zum Vorkommen von Methicillin-resistenten *Staphylococcus aureus* (MRSA) bei Haus- und Wildschweinen. *Deutsche Tierärztliche Wochenschrift* 2009; **116**(8): 297-301.
101. Mehboob A, Kocherginskaya SA, Aminov RI, Mackie RI. Quantitation of tetracycline resistance genes using Real-Time PCR on pig farms with and without antibiotic use. *Abstracts of the General Meeting of the American Society for Microbiology* 2003; **103**: A-043.

102. Millar JR. The relationship between use of apramycin in the poultry industry and the detection of gentamicin resistant E. coli in processed chickens. *New Zealand Journal of Medical Laboratory Science* 2007; **61**(3): 65-8.
103. Millman J, Waits K, Grande H, et al. Prevalence of antibiotic-resistant E. coli in retail chicken: comparing conventional, organic, kosher, and raised without antibiotics [version 1; referees: 1 approved, 1 approved with reservations]. *F1000Res* 2013; **2**(155): 1-14.
104. Miranda JM, Guarddon M, Mondragon A, et al. Antimicrobial resistance in Enterococcus spp. strains isolated from organic chicken, conventional chicken, and turkey meat: a comparative survey. *Journal of Food Protection* 2007; **70**(4): 1021-4.
105. Miranda JM, Guarddon M, Vázquez BI, et al. Antimicrobial resistance in Enterobacteriaceae strains isolated from organic chicken, conventional chicken and conventional turkey meat: a comparative survey. *Food Control* 2008; **19**(4): 412-6.
106. Miranda JM, Vázquez BI, Fente CA, Barros-Velázquez J, Cepeda A, Abuín CMF. Antimicrobial resistance in Escherichia coli strains isolated from organic and conventional pork meat: a comparative survey. *European Food Research and Technology* 2008; **226**(3): 371-5.
107. Miranda JM, Vazquez BI, Fente CA, Calo-Mata P, Cepeda A, Franco CM. Comparison of antimicrobial resistance in Escherichia coli, Staphylococcus aureus, and Listeria monocytogenes strains isolated from organic and conventional poultry meat. *Journal of Food Protection* 2008; **71**(12): 2537-42.
108. Miranda JM, Mondragon A, Vazquez BI, Fente CA, Cepeda A, Franco CM. Influence of farming methods on microbiological contamination and prevalence of resistance to antimicrobial drugs in isolates from beef. *Meat Sci* 2009; **82**(2): 284-8.
109. Miranda JM, Mondragón A, Vázquez BI, Fente CA, Cepeda A, Franco CM. Microbiological quality and antimicrobial resistance of Escherichia coli and Staphylococcus aureus isolated from conventional and organic "Arzúa-ulloa" cheese. *CyTA - Journal of Food* 2009; **7**(2): 103-10.
110. Miranda CD, Rojas R. Occurrence of florfenicol resistance in bacteria associated with two Chilean salmon farms with different history of antibacterial usage. *Aquaculture* 2007; **266**(1/4): 39-46.
111. Mitchell R, Warnick LD, Ray K, et al. Antimicrobial susceptibility of Salmonella isolates from organic and conventional dairy farms. In: Smith RA, editor. Proceedings of the Thirty-Seventh Annual Conference, American Association of Bovine Practitioners, Fort Worth, Texas, USA, 23-25 September, 2004. Stillwater; USA: American Association of Bovine Practitioners; 2004.
112. Mollenkopf DF, Cenera JK, Bryant EM, et al. Organic or antibiotic-free labeling does not impact the recovery of enteric pathogens and antimicrobial-resistant Escherichia coli from fresh retail chicken. *Foodborne Pathog Dis* 2014; **11**(12): 920-9.
113. Morley PS, Dargatz DA, Hyatt DR, et al. Effects of Restricted Antimicrobial Exposure on Antimicrobial Resistance in Fecal Escherichia coli from Feedlot Cattle. *Foodborne Pathog Dis* 2011; **8**(1): 87-98.
114. Nannapaneni R, Hanning I, Wiggins KC, Story RP, Ricke SC, Johnson MG. Ciprofloxacin-resistant Campylobacter persists in raw retail chicken after the fluoroquinolone ban. *Food Addit Contam* 2009; **26**(10): 1348-53.
115. Noormohamed A, Fakhr MK. Prevalence and Antimicrobial Susceptibility of Campylobacter spp. in Oklahoma Conventional and Organic Retail Poultry. *Open Microbiol J* 2014; **8**: 130-7.

116. Norby B, Bartlett P, Kaneene J. Prevalence and Antimicrobial susceptibility of *Campylobacter* in antibiotic-free and conventional swine farms in the Mid-Western United States. *IJMM International Journal of Medical Microbiology* 2003; **293**(Suppl. 35): 53.
117. Nugent C, Murdough P, Panky W, Barlow J. Establishing and comparing profiles of antimicrobial resistance in *Staphylococcus aureus* isolates from selected organic and conventional dairy farms in Vermont. *Journal of Dairy Science* 2001; **84**(Suppl. 1): 334.
118. Nulsen MF, Mor MB, Lawton DE. Antibiotic resistance among indicator bacteria isolated from healthy pigs in New Zealand. *N Z Vet J* 2008; **56**(1): 29-35.
119. Nwankwo C, Ayogu T, Ifeanyichukwu I, et al. Cloacal fecal carriage and occurrence of antibiotic resistant *Escherichia coli* in chicken grown with and without antibiotic supplemented feed. *Journal of Veterinary Medicine and Animal Health* 2014; **6**(3): 91-4.
120. Obeng AS, Rickard H, Ndi O, Sexton M, Barton M. Antibiotic resistance, phylogenetic grouping and virulence potential of *Escherichia coli* isolated from the faeces of intensively farmed and free range poultry. *Vet Microbiol* 2012; **154**: 305-15.
121. O'Brien AM, Hanson BM, Farina SA, et al. MRSA in conventional and alternative retail pork products. *PLoS ONE* 2012; **7**(1): e30092.
122. O'Neill C. Antibiotic-resistant staphylococci in the agricultural environment: reservoirs of resistance and infection [Ph.D.]. Ann Arbor: University of Warwick (United Kingdom); 2010.
123. Osadebe L-MU. Prevalence and Characteristics of Community associated Methicillin Resistant *Staphylococcus aureus* (CA-MRSA) In Connecticut Swine Industry [Ph.D.]. Ann Arbor: Yale University; 2012.
124. Osterberg J, Wingstrand A, Jensen AN, et al. Antibiotic resistance in *Escherichia coli* from pigs in organic and conventional farming in four european countries. *PLoS ONE* 2016; **11** (6) (no pagination)(e0157049).
125. Pantosti A, Del Grosso M, Tagliabue S, Macri A, Caprioli A. Decrease of vancomycin-resistant enterococci in poultry meat after avoparcin ban. *The Lancet* 1999; **354**(9180): 741-42.
126. Park YK, Fox LK, Hancock DD, McMahan W, Park YH. Prevalence and antibiotic resistance of mastitis pathogens isolated from dairy herds transitioning to organic management. *J vet sci* 2012; **13**(1): 103-5.
127. Patchanee P. Epidemiology of *Salmonella enterica* related to swine production system and food safety [Ph.D.]. Ann Arbor: The Ohio State University; 2008.
128. Peng M, Salaheen S, Almario JA, Tesfaye B, Buchanan R, Biswas D. Prevalence and antibiotic resistance pattern of *Salmonella* serovars in integrated crop-livestock farms and their products sold in local markets. *Environ Microbiol* 2016; **18**(5): 1654-65.
129. Pettey EA. Comparison of antibiotic susceptibility characteristics of fecal lactobacilli and the distribution of tetracycline resistance genes on two swine farms with different histories of antibiotic use [Ph.D.]. Ann Arbor: University of Kentucky; 2008.
130. Pol M, Ruegg PL. Relationship between antimicrobial drug usage and antimicrobial susceptibility of gram-positive mastitis pathogens. *Journal of Dairy Science* 2007; **90**(1): 262-73.
131. Price LB, Johnson E, Vailes R, Silbergeld E. Fluoroquinolone-resistant *Campylobacter* isolates from conventional and antibiotic-free chicken products. *Environ Health Perspect* 2005; **113**(5): 557-60.
132. Price LB, Lackey LG, Vailes R, Silbergeld E. The persistence of fluoroquinolone-resistant *Campylobacter* in poultry production. *Environ Health Perspect* 2007; **115**(7): 1035-9.
133. Ray KA, Warnick LD, Mitchell RM, et al. Antimicrobial susceptibility of *Salmonella* from organic and conventional dairy farms. *Journal of Dairy Science* 2006; **89**(6): 2038-50.

134. Reinstein S, Fox JT, Shi X, Alam MJ, Renter DG, Nagaraja TG. Prevalence of *Escherichia coli* O157:H7 in organically and naturally raised beef cattle. *Applied and Environmental Microbiology* 2009; **75**(16): 5421-3.
135. Roesch M, Perreten V, Doherr MG, Schaeren W, Schallibaum M, Blum JW. Comparison of antibiotic resistance of udder pathogens in dairy cows kept on organic and on conventional farms. *Journal of Dairy Science* 2006; **89**(3): 989-97.
136. Rollo SN, Norby B, Bartlett PC, et al. Prevalence and patterns of antimicrobial resistance in *Campylobacter* spp isolated from pigs reared under antimicrobial-free and conventional production methods in eight states in the Midwestern United States. *J Am Vet Med Assoc* 2010; **236**(2): 201-10.
137. Rossa LS, Stahlke EvR, Diez DC, Weber SH, Stertz SC, Macedo REFd. Antimicrobial resistance and occurrence of indicator and pathogenic bacteria in organic and conventional chicken meat: comparative study. / Resistência antimicrobiana e ocorrência de micro-organismos patogênicos e indicadores em frangos orgânicos e convencionais: estudo comparativo. *Biotemas* 2013; **26**(3): 211-20.
138. Salaheen S, Peng M, Biswas D. Ecological Dynamics of *Campylobacter* in Integrated Mixed Crop-Livestock Farms and Its Prevalence and Survival Ability in Post-Harvest Products. *Zoonoses and Public Health* 2016; **13**: 13.
139. Sanchez HM. Antibiotic Resistance in Bacteria Isolated from Commercial Meat Samples and Air Samples Near Agricultural Sites [Ph.D.]. Ann Arbor: University of California, Los Angeles; 2015.
140. Sapkota AR, Kim A, Hulet RM, et al. Trends in the Prevalence and Antibiotic-resistance of *Salmonella* After Conventional Poultry Farms Transition to Organic Practices. *Abstracts of the General Meeting of the American Society for Microbiology* 2010; **110**: Q-1478.
141. Sapkota AR, Hulet RM, Zhang G, et al. Lower prevalence of antibiotic-resistant *Enterococci* on U.S. conventional poultry farms that transitioned to organic practices. *Environ Health Perspect* 2011; **119**(11): 1622-8.
142. Sapkota AR, Kinney EL, George A, et al. Lower prevalence of antibiotic-resistant *Salmonella* on large-scale U.S. conventional poultry farms that transitioned to organic practices. *Sci Total Environ* 2014; **476-477**: 387-92.
143. Sato K, Bartlett PC, Kaneene JB, Downes FP. Comparison of prevalence and antimicrobial susceptibilities of *Campylobacter* spp. isolates from organic and conventional dairy herds in Wisconsin. *Appl Environ Microbiol* 2004; **70**(3): 1442-7.
144. Sato K, Bennedsgaard TW, Bartlett PC, Erskine RJ, Kaneene JB. Comparison of antimicrobial susceptibility of *Staphylococcus aureus* isolated from bulk tank milk in organic and conventional dairy herds in the midwestern United States and Denmark. *Journal of Food Protection* 2004; **67**(6): 1104-10.
145. Sato K, Bartlett PC, Saeed MA. Antimicrobial susceptibility of *Escherichia coli* isolates from dairy farms using organic versus conventional production methods. *J Am Vet Med Assoc* 2005; **226**(4): 589-94.
146. Schmidt JW, Agga GE, Bosilevac JM, Wheeler TL, Arthur TM. Variations in the fecal occurrences of antimicrobial-resistant bacteria are greater between seasons than between "raised without antibiotics" and "conventional" cattle production systems. 4th ASM conference on antimicrobial resistance in zoonotic bacteria and foodborne pathogens; 2015; Washington DC, USA; 2015.

147. Schwaiger K, Schmied EM, Bauer J. Comparative analysis of antibiotic resistance characteristics of Gram-negative bacteria isolated from laying hens and eggs in conventional and organic keeping systems in Bavaria, Germany. *Zoonoses and Public Health* 2008; **55**(7): 331-41.
148. Schwaiger K, Schmied EM, Bauer J. Comparative analysis on antibiotic resistance characteristics of *Listeria* spp. and *Enterococcus* spp. isolated from laying hens and eggs in conventional and organic keeping systems in Bavaria, Germany. *Zoonoses and Public Health* 2010; **57**(3): 171-80.
149. Siemon CE, Bahnson PB, Gebreyes WA. Comparative investigations of prevalence and antimicrobial resistance of *Salmonella* between pasture and conventionally reared poultry. *Avian Dis* 2007; **51**(1): 112-17.
150. Sicho WM, Stevenson J, Kinder D. A case study of antibiotic use practices to change population level antibiotic resistance. Antimicrobial resistance in zoonotic bacteria and foodborne pathogens in animals, humans and the environment. Toronto, Canada;; 2010.
151. Skjot-Rasmussen L, Ethelberg S, Emborg HD, et al. Trends in occurrence of antimicrobial resistance in *Campylobacter jejuni* isolates from broiler chickens, broiler chicken meat, and human domestically acquired cases and travel associated cases in Denmark. *Int J Food Microbiol* 2009; **131**(2-3): 277-9.
152. Smith HW, Lovell MA. *Escherichia coli* resistant to tetracyclines and to other antibiotics in the faeces of U.K. chickens and pigs in 1980. *J Hyg (Lond)* 1981; **87**(3): 477-83.
153. Smith TC, Gebreyes WA, Abley MJ, et al. Methicillin-resistant *Staphylococcus aureus* in pigs and farm workers on conventional and antibiotic-free swine farms in the USA. *PLoS ONE* 2013; **8**(5): e63704.
154. Soonthornchaikul N. Resistance to antimicrobial agents in campylobacter isolated from chickens raised in intensive and organic farms and its implications for the management of risk to human health [Ph.D.]. Ann Arbor: Middlesex University (United Kingdom); 2006.
155. Sørum M, Holstad G, Lillehaug A, Kruse H. Prevalence of Vancomycin Resistant Enterococci on Poultry Farms Established after the Ban of Avoparcin. *Avian Dis* 2004; **48**(4): 823-8.
156. Sørum M, Johnsen PJ, Aasnes B, et al. Prevalence, Persistence, and Molecular Characterization of Glycopeptide-Resistant Enterococci in Norwegian Poultry and Poultry Farmers 3 to 8 Years after the Ban on Avoparcin. *Appl Environ Microbiol* 2006; **72**(1): 516-21.
157. Stegeman JA, Vernooij JCM, Khalifa OA, Van den Broek J, Mevius DJ. Establishing the change in antibiotic resistance of *Enterococcus faecium* strains isolated from Dutch broilers by logistic regression and survival analysis. *Preventive Veterinary Medicine* 2006; **74**(1): 56-66.
158. Struve T, Vigre H, Wingstrand A, et al. Effect of antimicrobial consumption on the occurrence of resistance in conventional, free range and organic slaughter pig production in Denmark. 2nd ASM Conference on Antimicrobial Resistance in Zoonotic Bacteria and Foodborne Pathogens in Animals, Humans and the Environment. Toronto, Canada;; 2010.
159. Suriyasathaporn W. Milk quality and antimicrobial resistance against mastitis pathogens after changing from a conventional to an experimentally organic dairy farm. *Asian-Australasian Journal of Animal Sciences* 2010; **23**(5): 659-64.
160. Tadesse DA. Molecular epidemiology of *Campylobacter* and *Yersinia enterocolitica* isolates from pigs reared in conventional and antibiotic free farms from different geographic regions [Ph.D.]. Ann Arbor: The Ohio State University; 2009.

161. Tamang MD, Gurung M, Nam HM, et al. Prevalence and characterization of Salmonella in pigs from conventional and organic farms and first report of S. serovar 1,4,[5],12:i:- from Korea. *Vet Microbiol* 2015; **178**(1-2): 119-24.
162. Teramoto H, Salaheen S, Debabrata B. Contamination of post-harvest poultry products with multidrug resistant Staphylococcus aureus in Maryland-Washington DC metro area. *Food Control* 2016; **65**: 132-35.
163. Thakur S, Gebreyes WA. Prevalence and Antimicrobial Resistance of Campylobacter in Antimicrobial-Free and Conventional Pig Production Systems. *Journal of Food Protection* 2005; **68**(11): 2402-10.
164. Tikofsky LL, Barlow JW, Santisteban C, Schukken YH. A comparison of antimicrobial susceptibility patterns for Staphylococcus aureus in organic and conventional dairy herds. *Microb Drug Resist* 2003; **9**(Suppl 1): S39-45.
165. Tragesser LA, Wittum TE, Funk JA, Winokur PL, Rajala-Schultz PJ. Association between ceftiofur use and isolation of Escherichia coli with reduced susceptibility to ceftriaxone from fecal samples of dairy cows. *American Journal of Veterinary Research* 2006; **67**(10): 1696-700.
166. Trost E, Mantel O, Dobrindt U. Genomic and phenotypic characterization of commensal E. coli isolates from chicken: Prevalence of virulence and resistance traits. *International Journal of Medical Microbiology* 2013; **303**: 63-4.
167. Truszczyn'ski M, Pejsak Z. Influence of antibiotics used in animals on antibiotic resistance to bacteria pathogenic for man. / Wpływ stosowania u zwierząt antybiotyków na lekooporność bakterii chorobotwórczych dla człowieka. *Medycyna Weterynaryjna* 2006; **62**(12): 1339-43.
168. van den Bogaard AE, Bruinsma N, Stobberingh EE. The effect of banning avoparcin on VRE carriage in The Netherlands. *Journal of Antimicrobial Chemotherapy* 2000; **46**(1): 146-8.
169. van den Bogaard AE, London N, Driessen C, Stobberingh EE. Antibiotic resistance of faecal Escherichia coli in poultry, poultry farmers and poultry slaughterers. *Journal of Antimicrobial Chemotherapy* 2001; **47**(6): 763-71.
170. Veldman K, Dierikx C, Testerink J, et al. Decrease of antimicrobial resistance in E. coli from animal husbandry reflects the reduction of antibiotic usage in animals in the Netherlands. 24th European Congress of Clinical Microbiology and Infectious Diseases; 2014; Barcelona, Spain; 2014.
171. Walk ST, Mladonicky JM, Middleton JA, et al. Influence of antibiotic selection on genetic composition of Escherichia coli populations from conventional and organic dairy farms. *Appl Environ Microbiol* 2007; **73**(19): 5982-9.
172. Wanninger S, Donati M, Di Francesco A, et al. Selective pressure promotes tetracycline resistance of Chlamydia suis in fattening pigs. *PLoS ONE* 2016; **11** (11) (no pagination)(e0166917).
173. Warnick L, Ray K, Mitchell R, et al. Salmonella antimicrobial resistance on organic and conventional dairy farms. *Science - Prevention - Control*; 2015.
174. Wyckoff TJ, Wyckoff PH, Hanson JA, Davison JM, Gerber MM, Skala JR. Changes in Antimicrobial Susceptibility of Staphylococcus Milk Isolates from a West-Central Minnesota Dairy Herd During Transition to Organic Management. *Abstracts of the General Meeting of the American Society for Microbiology* 2012; **112**: 3156.



175. Zawack K, Li M, Booth JG, Love W, Lanzas C, Grohn YT. Monitoring Antimicrobial Resistance in the Food Supply Chain and its Implications for FDA Policy Initiatives. *Antimicrob Agents Chemother* 2016; **20**: 20.
176. Zhang Y. Antimicrobial resistance of *Listeria monocytogenes* and *Enterococcus faecium* from food and animal sources [Ph.D.]. Ann Arbor: University of Maryland, College Park; 2005.
177. Zhang J, Wall SK, Xu L, Ebner PD. Contamination rates and antimicrobial resistance in bacteria isolated from "grass-fed" labeled beef products. *Foodborne Pathog Dis* 2010; **7**(11): 1331-6.
178. Zhang J, Massow A, Stanley M, et al. Contamination rates and antimicrobial resistance in *Enterococcus* spp., *Escherichia coli*, and *Salmonella* isolated from "no antibiotics added"-labeled chicken products. *Foodborne Pathog Dis* 2011; **8**(11): 1147-52.
179. Zwonitzer MR, Soupir ML, Jarboe LR, Smith DR. Quantifying Attachment and Antibiotic Resistance of from Conventional and Organic Swine Manure. *J Environ Qual* 2016; **45**(2): 609-17.
180. Klare I, Badstübner D, Konstabel C, Böhme G, Claus H, Witte W. Decreased incidence of VanA-type Vancomycin-Resistant Enterococci isolated from poultry meat and from faecal samples of humans in the community after discontinuation of Avoparcin usage in animal husbandry. *Microbial Drug Resistance* 1999; **5**(1): 45-52.
181. Rinsky JL, Nadimpalli M, Wing S, et al. Livestock-associated methicillin and multidrug resistant *Staphylococcus aureus* is present among industrial, not antibiotic-free livestock operation workers in North Carolina. *PLoS ONE* 2013; **8**(7): e67641.
